# Supplementary material for: Survey of owner motivations and veterinary input of owners feeding diets containing raw animal products
Source: PeerJ. 2017 Mar 2;5:e3031. doi: 10.7717/peerj.3031 (PMC5337082; doi:10.7717/peerj.3031)
Supplement: Supplemental Information 1 [file peerj-05-3031-s001.xlsx]

## Sheet: VariableLabels
V1	ResponseID
V8	StartDate
V9	EndDate
Q1.1_10	Do you currently have a dog or cat in your household: No?
Q1.1_11	Do you currently have a dog or cat in your household: Yes, cat(s)?
Q1.1_12	Do you currently have a dog or cat in your household: Yes, dog(s)?
Q1.1c_1	Please specify the number of cats.
Q1.1d_1	Please specify the number of dogs.
Q2.13_1_1	How often do you take each pet to a veterinarian: cat-1?
Q2.13_1_2	How often do you take each pet to a veterinarian: cat-2?
Q2.13_1_3	How often do you take each pet to a veterinarian: cat-3?
Q2.13_1_4	How often do you take each pet to a veterinarian: cat-4?
Q2.13_1_5	How often do you take each pet to a veterinarian: cat-5?
Q2.13_1_6	How often do you take each pet to a veterinarian: cat-6?
Q2.13_1_7	How often do you take each pet to a veterinarian: cat-7?
Q2.13_1_8	How often do you take each pet to a veterinarian: cat-8?
Q2.13_1_9	How often do you take each pet to a veterinarian: cat-9?
Q2.13_1_10	How often do you take each pet to a veterinarian: cat-10?
Q2.13_1_11	How often do you take each pet to a veterinarian: dog-1?
Q2.13_1_12	How often do you take each pet to a veterinarian: dog-2?
Q2.13_1_13	How often do you take each pet to a veterinarian: dog-3?
Q2.13_1_14	How often do you take each pet to a veterinarian: dog-4?
Q2.13_1_15	How often do you take each pet to a veterinarian: dog-5?
Q2.13_1_16	How often do you take each pet to a veterinarian: dog-6?
Q2.13_1_17	How often do you take each pet to a veterinarian: dog-7?
Q2.13_1_18	How often do you take each pet to a veterinarian: dog-8?
Q2.13_1_19	How often do you take each pet to a veterinarian: dog-9?
Q2.13_1_20	How often do you take each pet to a veterinarian: dog-10?
Q2.14_1_1	How often and under what circumstances do you discuss each pet's diet/nutrition with your veternarian: cat-1?
Q2.14_1_2	How often and under what circumstances do you discuss each pet's diet/nutrition with your veternarian: cat-2?
Q2.14_1_3	How often and under what circumstances do you discuss each pet's diet/nutrition with your veternarian: cat-3?
Q2.14_1_4	How often and under what circumstances do you discuss each pet's diet/nutrition with your veternarian: cat-4?
Q2.14_1_5	How often and under what circumstances do you discuss each pet's diet/nutrition with your veternarian: cat-5?
Q2.14_1_6	How often and under what circumstances do you discuss each pet's diet/nutrition with your veternarian: cat-6?
Q2.14_1_7	How often and under what circumstances do you discuss each pet's diet/nutrition with your veternarian: cat-7?
Q2.14_1_8	How often and under what circumstances do you discuss each pet's diet/nutrition with your veternarian: cat-8?
Q2.14_1_9	How often and under what circumstances do you discuss each pet's diet/nutrition with your veternarian: cat-9?
Q2.14_1_10	How often and under what circumstances do you discuss each pet's diet/nutrition with your veternarian: cat-10?
Q2.14_1_11	How often and under what circumstances do you discuss each pet's diet/nutrition with your veternarian: dog-1?
Q2.14_1_12	How often and under what circumstances do you discuss each pet's diet/nutrition with your veternarian: dog-2?
Q2.14_1_13	How often and under what circumstances do you discuss each pet's diet/nutrition with your veternarian: dog-3?
Q2.14_1_14	How often and under what circumstances do you discuss each pet's diet/nutrition with your veternarian: dog-4?
Q2.14_1_15	How often and under what circumstances do you discuss each pet's diet/nutrition with your veternarian: dog-5?
Q2.14_1_16	How often and under what circumstances do you discuss each pet's diet/nutrition with your veternarian: dog-6?
Q2.14_1_17	How often and under what circumstances do you discuss each pet's diet/nutrition with your veternarian: dog-7?
Q2.14_1_18	How often and under what circumstances do you discuss each pet's diet/nutrition with your veternarian: dog-8?
Q2.14_1_19	How often and under what circumstances do you discuss each pet's diet/nutrition with your veternarian: dog-9?
Q2.14_1_20	How often and under what circumstances do you discuss each pet's diet/nutrition with your veternarian: dog-10?
Q2.21_1_1	Have you ever fed this pet raw animal products one or more times weekly: cat-1?
Q2.21_1_2	Have you ever fed this pet raw animal products one or more times weekly: cat-2?
Q2.21_1_3	Have you ever fed this pet raw animal products one or more times weekly: cat-3?
Q2.21_1_4	Have you ever fed this pet raw animal products one or more times weekly: cat-4?
Q2.21_1_5	Have you ever fed this pet raw animal products one or more times weekly: cat-5?
Q2.21_1_6	Have you ever fed this pet raw animal products one or more times weekly: cat-6?
Q2.21_1_7	Have you ever fed this pet raw animal products one or more times weekly: cat-7?
Q2.21_1_8	Have you ever fed this pet raw animal products one or more times weekly: cat-8?
Q2.21_1_9	Have you ever fed this pet raw animal products one or more times weekly: cat-9?
Q2.21_1_10	Have you ever fed this pet raw animal products one or more times weekly: cat-10?
Q2.21_1_11	Have you ever fed this pet raw animal products one or more times weekly: dog-1?
Q2.21_1_12	Have you ever fed this pet raw animal products one or more times weekly: dog-2?
Q2.21_1_13	Have you ever fed this pet raw animal products one or more times weekly: dog-3?
Q2.21_1_14	Have you ever fed this pet raw animal products one or more times weekly: dog-4?
Q2.21_1_15	Have you ever fed this pet raw animal products one or more times weekly: dog-5?
Q2.21_1_16	Have you ever fed this pet raw animal products one or more times weekly: dog-6?
Q2.21_1_17	Have you ever fed this pet raw animal products one or more times weekly: dog-7?
Q2.21_1_18	Have you ever fed this pet raw animal products one or more times weekly: dog-8?
Q2.21_1_19	Have you ever fed this pet raw animal products one or more times weekly: dog-9?
Q2.21_1_20	Have you ever fed this pet raw animal products one or more times weekly: dog-10?
Q2.22_1_1	Do you currently feed this pet raw animal products one or more times weekly: cat-1?
Q2.22_1_2	Do you currently feed this pet raw animal products one or more times weekly: cat-2?
Q2.22_1_3	Do you currently feed this pet raw animal products one or more times weekly: cat-3?
Q2.22_1_4	Do you currently feed this pet raw animal products one or more times weekly: cat-4?
Q2.22_1_5	Do you currently feed this pet raw animal products one or more times weekly: cat-5?
Q2.22_1_6	Do you currently feed this pet raw animal products one or more times weekly: cat-6?
Q2.22_1_7	Do you currently feed this pet raw animal products one or more times weekly: cat-7?
Q2.22_1_8	Do you currently feed this pet raw animal products one or more times weekly: cat-8?
Q2.22_1_9	Do you currently feed this pet raw animal products one or more times weekly: cat-9?
Q2.22_1_10	Do you currently feed this pet raw animal products one or more times weekly: cat-10?
Q2.22_1_11	Do you currently feed this pet raw animal products one or more times weekly: dog-1?
Q2.22_1_12	Do you currently feed this pet raw animal products one or more times weekly: dog-2?
Q2.22_1_13	Do you currently feed this pet raw animal products one or more times weekly: dog-3?
Q2.22_1_14	Do you currently feed this pet raw animal products one or more times weekly: dog-4?
Q2.22_1_15	Do you currently feed this pet raw animal products one or more times weekly: dog-5?
Q2.22_1_16	Do you currently feed this pet raw animal products one or more times weekly: dog-6?
Q2.22_1_17	Do you currently feed this pet raw animal products one or more times weekly: dog-7?
Q2.22_1_18	Do you currently feed this pet raw animal products one or more times weekly: dog-8?
Q2.22_1_19	Do you currently feed this pet raw animal products one or more times weekly: dog-9?
Q2.22_1_20	Do you currently feed this pet raw animal products one or more times weekly: dog-10?
Q2.25c1_4	What made you choose to feed cat-1 raw animal products: Concern about safety/quality control/nutritional value of commercial foods?
Q2.25c1_5	What made you choose to feed cat-1 raw animal products: Discussion with a friend or family member?
Q2.25c1_6	What made you choose to feed cat-1 raw animal products: Read about raw animal products (RAP) on a message board or website?
Q2.25c1_7	What made you choose to feed cat-1 raw animal products: My veterinarian?
Q2.25c1_8	What made you choose to feed cat-1 raw animal products: A veterinary resource other than my veterinarian?
Q2.25c1_9	What made you choose to feed cat-1 raw animal products: I try not to consume processed foods and do not want my pet to consume them either?
Q2.25c1_10	What made you choose to feed cat-1 raw animal products: To prevent food allergies?
Q2.25c1_11	What made you choose to feed cat-1 raw animal products: To improve dental or oral hygiene?
Q2.25c1_12	What made you choose to feed cat-1 raw animal products: To improve the skin or coat?
Q2.25c1_13	What made you choose to feed cat-1 raw animal products: To improve my pet's immune system?
Q2.25c1_14	What made you choose to feed cat-1 raw animal products: Feeding a raw animal product diet is healthier?
Q2.25c1_15	What made you choose to feed cat-1 raw animal products: Feeding a raw animal product diet is more natural?
Q2.25c1_16	What made you choose to feed cat-1 raw animal products: My pet prefers a raw animal product diet?
Q2.25c1_17	What made you choose to feed cat-1 raw animal products: Other reason?
Q2.25c1_17_TEXT	What made you choose to feed cat-1 raw animal products: Other reason-TEXT?
Q2.25c2_4	What made you choose to feed cat-2 raw animal products: Concern about safety/quality control/nutritional value of commercial foods?
Q2.25c2_5	What made you choose to feed cat-2 raw animal products: Discussion with a friend or family member?
Q2.25c2_6	What made you choose to feed cat-2 raw animal products: Read about raw animal products (RAP) on a message board or website?
Q2.25c2_7	What made you choose to feed cat-2 raw animal products: My veterinarian?
Q2.25c2_8	What made you choose to feed cat-2 raw animal products: A veterinary resource other than my veterinarian?
Q2.25c2_9	What made you choose to feed cat-2 raw animal products: I try not to consume processed foods and do not want my pet to consume them either?
Q2.25c2_10	What made you choose to feed cat-2 raw animal products: To prevent food allergies?
Q2.25c2_11	What made you choose to feed cat-2 raw animal products: To improve dental or oral hygiene?
Q2.25c2_12	What made you choose to feed cat-2 raw animal products: To improve the skin or coat?
Q2.25c2_13	What made you choose to feed cat-2 raw animal products: To improve my pet's immune system?
Q2.25c2_14	What made you choose to feed cat-2 raw animal products: Feeding a raw animal product diet is healthier?
Q2.25c2_15	What made you choose to feed cat-2 raw animal products: Feeding a raw animal product diet is more natural?
Q2.25c2_16	What made you choose to feed cat-2 raw animal products: My pet prefers a raw animal product diet?
Q2.25c2_17	What made you choose to feed cat-2 raw animal products: Other reason?
Q2.25c2_17_TEXT	What made you choose to feed cat-2 raw animal products: Other reason-TEXT?
Q2.25c3_4	What made you choose to feed cat-3 raw animal products: Concern about safety/quality control/nutritional value of commercial foods?
Q2.25c3_5	What made you choose to feed cat-3 raw animal products: Discussion with a friend or family member?
Q2.25c3_6	What made you choose to feed cat-3 raw animal products: Read about raw animal products (RAP) on a message board or website?
Q2.25c3_7	What made you choose to feed cat-3 raw animal products: My veterinarian?
Q2.25c3_8	What made you choose to feed cat-3 raw animal products: A veterinary resource other than my veterinarian?
Q2.25c3_9	What made you choose to feed cat-3 raw animal products: I try not to consume processed foods and do not want my pet to consume them either?
Q2.25c3_10	What made you choose to feed cat-3 raw animal products: To prevent food allergies?
Q2.25c3_11	What made you choose to feed cat-3 raw animal products: To improve dental or oral hygiene?
Q2.25c3_12	What made you choose to feed cat-3 raw animal products: To improve the skin or coat?
Q2.25c3_13	What made you choose to feed cat-3 raw animal products: To improve my pet's immune system?
Q2.25c3_14	What made you choose to feed cat-3 raw animal products: Feeding a raw animal product diet is healthier?
Q2.25c3_15	What made you choose to feed cat-3 raw animal products: Feeding a raw animal product diet is more natural?
Q2.25c3_16	What made you choose to feed cat-3 raw animal products: My pet prefers a raw animal product diet?
Q2.25c3_17	What made you choose to feed cat-3 raw animal products: Other reason?
Q2.25c3_17_TEXT	What made you choose to feed cat-3 raw animal products: Other reason-TEXT?
Q2.25c4_4	What made you choose to feed cat-4 raw animal products: Concern about safety/quality control/nutritional value of commercial foods?
Q2.25c4_5	What made you choose to feed cat-4 raw animal products: Discussion with a friend or family member?
Q2.25c4_6	What made you choose to feed cat-4 raw animal products: Read about raw animal products (RAP) on a message board or website?
Q2.25c4_7	What made you choose to feed cat-4 raw animal products: My veterinarian?
Q2.25c4_8	What made you choose to feed cat-4 raw animal products: A veterinary resource other than my veterinarian?
Q2.25c4_9	What made you choose to feed cat-4 raw animal products: I try not to consume processed foods and do not want my pet to consume them either?
Q2.25c4_10	What made you choose to feed cat-4 raw animal products: To prevent food allergies?
Q2.25c4_11	What made you choose to feed cat-4 raw animal products: To improve dental or oral hygiene?
Q2.25c4_12	What made you choose to feed cat-4 raw animal products: To improve the skin or coat?
Q2.25c4_13	What made you choose to feed cat-4 raw animal products: To improve my pet's immune system?
Q2.25c4_14	What made you choose to feed cat-4 raw animal products: Feeding a raw animal product diet is healthier?
Q2.25c4_15	What made you choose to feed cat-4 raw animal products: Feeding a raw animal product diet is more natural?
Q2.25c4_16	What made you choose to feed cat-4 raw animal products: My pet prefers a raw animal product diet?
Q2.25c4_17	What made you choose to feed cat-4 raw animal products: Other reason?
Q2.25c4_17_TEXT	What made you choose to feed cat-4 raw animal products: Other reason-TEXT?
Q2.25c5_4	What made you choose to feed cat-5 raw animal products: Concern about safety/quality control/nutritional value of commercial foods?
Q2.25c5_5	What made you choose to feed cat-5 raw animal products: Discussion with a friend or family member?
Q2.25c5_6	What made you choose to feed cat-5 raw animal products: Read about raw animal products (RAP) on a message board or website?
Q2.25c5_7	What made you choose to feed cat-5 raw animal products: My veterinarian?
Q2.25c5_8	What made you choose to feed cat-5 raw animal products: A veterinary resource other than my veterinarian?
Q2.25c5_9	What made you choose to feed cat-5 raw animal products: I try not to consume processed foods and do not want my pet to consume them either?
Q2.25c5_10	What made you choose to feed cat-5 raw animal products: To prevent food allergies?
Q2.25c5_11	What made you choose to feed cat-5 raw animal products: To improve dental or oral hygiene?
Q2.25c5_12	What made you choose to feed cat-5 raw animal products: To improve the skin or coat?
Q2.25c5_13	What made you choose to feed cat-5 raw animal products: To improve my pet's immune system?
Q2.25c5_14	What made you choose to feed cat-5 raw animal products: Feeding a raw animal product diet is healthier?
Q2.25c5_15	What made you choose to feed cat-5 raw animal products: Feeding a raw animal product diet is more natural?
Q2.25c5_16	What made you choose to feed cat-5 raw animal products: My pet prefers a raw animal product diet?
Q2.25c5_17	What made you choose to feed cat-5 raw animal products: Other reason?
Q2.25c5_17_TEXT	What made you choose to feed cat-5 raw animal products: Other reason-TEXT?
Q2.25c6_4	What made you choose to feed cat-6 raw animal products: Concern about safety/quality control/nutritional value of commercial foods?
Q2.25c6_5	What made you choose to feed cat-6 raw animal products: Discussion with a friend or family member?
Q2.25c6_6	What made you choose to feed cat-6 raw animal products: Read about raw animal products (RAP) on a message board or website?
Q2.25c6_7	What made you choose to feed cat-6 raw animal products: My veterinarian?
Q2.25c6_8	What made you choose to feed cat-6 raw animal products: A veterinary resource other than my veterinarian?
Q2.25c6_9	What made you choose to feed cat-6 raw animal products: I try not to consume processed foods and do not want my pet to consume them either?
Q2.25c6_10	What made you choose to feed cat-6 raw animal products: To prevent food allergies?
Q2.25c6_11	What made you choose to feed cat-6 raw animal products: To improve dental or oral hygiene?
Q2.25c6_12	What made you choose to feed cat-6 raw animal products: To improve the skin or coat?
Q2.25c6_13	What made you choose to feed cat-6 raw animal products: To improve my pet's immune system?
Q2.25c6_14	What made you choose to feed cat-6 raw animal products: Feeding a raw animal product diet is healthier?
Q2.25c6_15	What made you choose to feed cat-6 raw animal products: Feeding a raw animal product diet is more natural?
Q2.25c6_16	What made you choose to feed cat-6 raw animal products: My pet prefers a raw animal product diet?
Q2.25c6_17	What made you choose to feed cat-6 raw animal products: Other reason?
Q2.25c6_17_TEXT	What made you choose to feed cat-6 raw animal products: Other reason-TEXT?
Q2.25c7_4	What made you choose to feed cat-7 raw animal products: Concern about safety/quality control/nutritional value of commercial foods?
Q2.25c7_5	What made you choose to feed cat-7 raw animal products: Discussion with a friend or family member?
Q2.25c7_6	What made you choose to feed cat-7 raw animal products: Read about raw animal products (RAP) on a message board or website?
Q2.25c7_7	What made you choose to feed cat-7 raw animal products: My veterinarian?
Q2.25c7_8	What made you choose to feed cat-7 raw animal products: A veterinary resource other than my veterinarian?
Q2.25c7_9	What made you choose to feed cat-7 raw animal products: I try not to consume processed foods and do not want my pet to consume them either?
Q2.25c7_10	What made you choose to feed cat-7 raw animal products: To prevent food allergies?
Q2.25c7_11	What made you choose to feed cat-7 raw animal products: To improve dental or oral hygiene?
Q2.25c7_12	What made you choose to feed cat-7 raw animal products: To improve the skin or coat?
Q2.25c7_13	What made you choose to feed cat-7 raw animal products: To improve my pet's immune system?
Q2.25c7_14	What made you choose to feed cat-7 raw animal products: Feeding a raw animal product diet is healthier?
Q2.25c7_15	What made you choose to feed cat-7 raw animal products: Feeding a raw animal product diet is more natural?
Q2.25c7_16	What made you choose to feed cat-7 raw animal products: My pet prefers a raw animal product diet?
Q2.25c7_17	What made you choose to feed cat-7 raw animal products: Other reason?
Q2.25c7_17_TEXT	What made you choose to feed cat-7 raw animal products: Other reason-TEXT?
Q2.25c8_4	What made you choose to feed cat-8 raw animal products: Concern about safety/quality control/nutritional value of commercial foods?
Q2.25c8_5	What made you choose to feed cat-8 raw animal products: Discussion with a friend or family member?
Q2.25c8_6	What made you choose to feed cat-8 raw animal products: Read about raw animal products (RAP) on a message board or website?
Q2.25c8_7	What made you choose to feed cat-8 raw animal products: My veterinarian?
Q2.25c8_8	What made you choose to feed cat-8 raw animal products: A veterinary resource other than my veterinarian?
Q2.25c8_9	What made you choose to feed cat-8 raw animal products: I try not to consume processed foods and do not want my pet to consume them either?
Q2.25c8_10	What made you choose to feed cat-8 raw animal products: To prevent food allergies?
Q2.25c8_11	What made you choose to feed cat-8 raw animal products: To improve dental or oral hygiene?
Q2.25c8_12	What made you choose to feed cat-8 raw animal products: To improve the skin or coat?
Q2.25c8_13	What made you choose to feed cat-8 raw animal products: To improve my pet's immune system?
Q2.25c8_14	What made you choose to feed cat-8 raw animal products: Feeding a raw animal product diet is healthier?
Q2.25c8_15	What made you choose to feed cat-8 raw animal products: Feeding a raw animal product diet is more natural?
Q2.25c8_16	What made you choose to feed cat-8 raw animal products: My pet prefers a raw animal product diet?
Q2.25c8_17	What made you choose to feed cat-8 raw animal products: Other reason?
Q2.25c8_17_TEXT	What made you choose to feed cat-8 raw animal products: Other reason-TEXT?
Q2.25c9_4	What made you choose to feed cat-9 raw animal products: Concern about safety/quality control/nutritional value of commercial foods?
Q2.25c9_5	What made you choose to feed cat-9 raw animal products: Discussion with a friend or family member?
Q2.25c9_6	What made you choose to feed cat-9 raw animal products: Read about raw animal products (RAP) on a message board or website?
Q2.25c9_7	What made you choose to feed cat-9 raw animal products: My veterinarian?
Q2.25c9_8	What made you choose to feed cat-9 raw animal products: A veterinary resource other than my veterinarian?
Q2.25c9_9	What made you choose to feed cat-9 raw animal products: I try not to consume processed foods and do not want my pet to consume them either?
Q2.25c9_10	What made you choose to feed cat-9 raw animal products: To prevent food allergies?
Q2.25c9_11	What made you choose to feed cat-9 raw animal products: To improve dental or oral hygiene?
Q2.25c9_12	What made you choose to feed cat-9 raw animal products: To improve the skin or coat?
Q2.25c9_13	What made you choose to feed cat-9 raw animal products: To improve my pet's immune system?
Q2.25c9_14	What made you choose to feed cat-9 raw animal products: Feeding a raw animal product diet is healthier?
Q2.25c9_15	What made you choose to feed cat-9 raw animal products: Feeding a raw animal product diet is more natural?
Q2.25c9_16	What made you choose to feed cat-9 raw animal products: My pet prefers a raw animal product diet?
Q2.25c9_17	What made you choose to feed cat-9 raw animal products: Other reason?
Q2.25c9_17_TEXT	What made you choose to feed cat-9 raw animal products: Other reason-TEXT?
Q2.25c10_4	What made you choose to feed cat-10 raw animal products: Concern about safety/quality control/nutritional value of commercial foods?
Q2.25c10_5	What made you choose to feed cat-10 raw animal products: Discussion with a friend or family member?
Q2.25c10_6	What made you choose to feed cat-10 raw animal products: Read about raw animal products (RAP) on a message board or website?
Q2.25c10_7	What made you choose to feed cat-10 raw animal products: My veterinarian?
Q2.25c10_8	What made you choose to feed cat-10 raw animal products: A veterinary resource other than my veterinarian?
Q2.25c10_9	What made you choose to feed cat-10 raw animal products: I try not to consume processed foods and do not want my pet to consume them either?
Q2.25c10_10	What made you choose to feed cat-10 raw animal products: To prevent food allergies?
Q2.25c10_11	What made you choose to feed cat-10 raw animal products: To improve dental or oral hygiene?
Q2.25c10_12	What made you choose to feed cat-10 raw animal products: To improve the skin or coat?
Q2.25c10_13	What made you choose to feed cat-10 raw animal products: To improve my pet's immune system?
Q2.25c10_14	What made you choose to feed cat-10 raw animal products: Feeding a raw animal product diet is healthier?
Q2.25c10_15	What made you choose to feed cat-10 raw animal products: Feeding a raw animal product diet is more natural?
Q2.25c10_16	What made you choose to feed cat-10 raw animal products: My pet prefers a raw animal product diet?
Q2.25c10_17	What made you choose to feed cat-10 raw animal products: Other reason?
Q2.25c10_17_TEXT	What made you choose to feed cat-10 raw animal products: Other reason-TEXT?
Q2.25d1_4	What made you choose to feed dog-1 raw animal products: Concern about safety/quality control/nutritional value of commercial foods?
Q2.25d1_5	What made you choose to feed dog-1 raw animal products: Discussion with a friend or family member?
Q2.25d1_6	What made you choose to feed dog-1 raw animal products: Read about raw animal products (RAP) on a message board or website?
Q2.25d1_7	What made you choose to feed dog-1 raw animal products: My veterinarian?
Q2.25d1_8	What made you choose to feed dog-1 raw animal products: A veterinary resource other than my veterinarian?
Q2.25d1_9	What made you choose to feed dog-1 raw animal products: I try not to consume processed foods and do not want my pet to consume them either?
Q2.25d1_10	What made you choose to feed dog-1 raw animal products: To prevent food allergies?
Q2.25d1_11	What made you choose to feed dog-1 raw animal products: To improve dental or oral hygiene?
Q2.25d1_12	What made you choose to feed dog-1 raw animal products: To improve the skin or coat?
Q2.25d1_13	What made you choose to feed dog-1 raw animal products: To improve my pet's immune system?
Q2.25d1_14	What made you choose to feed dog-1 raw animal products: Feeding a raw animal product diet is healthier?
Q2.25d1_15	What made you choose to feed dog-1 raw animal products: Feeding a raw animal product diet is more natural?
Q2.25d1_16	What made you choose to feed dog-1 raw animal products: My pet prefers a raw animal product diet?
Q2.25d1_17	What made you choose to feed dog-1 raw animal products: Other reason?
Q2.25d1_17_TEXT	What made you choose to feed dog-1 raw animal products: Other reason-TEXT?
Q2.25d2_4	What made you choose to feed dog-2 raw animal products: Concern about safety/quality control/nutritional value of commercial foods?
Q2.25d2_5	What made you choose to feed dog-2 raw animal products: Discussion with a friend or family member?
Q2.25d2_6	What made you choose to feed dog-2 raw animal products: Read about raw animal products (RAP) on a message board or website?
Q2.25d2_7	What made you choose to feed dog-2 raw animal products: My veterinarian?
Q2.25d2_8	What made you choose to feed dog-2 raw animal products: A veterinary resource other than my veterinarian?
Q2.25d2_9	What made you choose to feed dog-2 raw animal products: I try not to consume processed foods and do not want my pet to consume them either?
Q2.25d2_10	What made you choose to feed dog-2 raw animal products: To prevent food allergies?
Q2.25d2_11	What made you choose to feed dog-2 raw animal products: To improve dental or oral hygiene?
Q2.25d2_12	What made you choose to feed dog-2 raw animal products: To improve the skin or coat?
Q2.25d2_13	What made you choose to feed dog-2 raw animal products: To improve my pet's immune system?
Q2.25d2_14	What made you choose to feed dog-2 raw animal products: Feeding a raw animal product diet is healthier?
Q2.25d2_15	What made you choose to feed dog-2 raw animal products: Feeding a raw animal product diet is more natural?
Q2.25d2_16	What made you choose to feed dog-2 raw animal products: My pet prefers a raw animal product diet?
Q2.25d2_17	What made you choose to feed dog-2 raw animal products: Other reason?
Q2.25d2_17_TEXT	What made you choose to feed dog-2 raw animal products: Other reason-TEXT?
Q2.25d3_4	What made you choose to feed dog-3 raw animal products: Concern about safety/quality control/nutritional value of commercial foods?
Q2.25d3_5	What made you choose to feed dog-3 raw animal products: Discussion with a friend or family member?
Q2.25d3_6	What made you choose to feed dog-3 raw animal products: Read about raw animal products (RAP) on a message board or website?
Q2.25d3_7	What made you choose to feed dog-3 raw animal products: My veterinarian?
Q2.25d3_8	What made you choose to feed dog-3 raw animal products: A veterinary resource other than my veterinarian?
Q2.25d3_9	What made you choose to feed dog-3 raw animal products: I try not to consume processed foods and do not want my pet to consume them either?
Q2.25d3_10	What made you choose to feed dog-3 raw animal products: To prevent food allergies?
Q2.25d3_11	What made you choose to feed dog-3 raw animal products: To improve dental or oral hygiene?
Q2.25d3_12	What made you choose to feed dog-3 raw animal products: To improve the skin or coat?
Q2.25d3_13	What made you choose to feed dog-3 raw animal products: To improve my pet's immune system?
Q2.25d3_14	What made you choose to feed dog-3 raw animal products: Feeding a raw animal product diet is healthier?
Q2.25d3_15	What made you choose to feed dog-3 raw animal products: Feeding a raw animal product diet is more natural?
Q2.25d3_16	What made you choose to feed dog-3 raw animal products: My pet prefers a raw animal product diet?
Q2.25d3_17	What made you choose to feed dog-3 raw animal products: Other reason?
Q2.25d3_17_TEXT	What made you choose to feed dog-3 raw animal products: Other reason-TEXT?
Q2.25d4_4	What made you choose to feed dog-4 raw animal products: Concern about safety/quality control/nutritional value of commercial foods?
Q2.25d4_5	What made you choose to feed dog-4 raw animal products: Discussion with a friend or family member?
Q2.25d4_6	What made you choose to feed dog-4 raw animal products: Read about raw animal products (RAP) on a message board or website?
Q2.25d4_7	What made you choose to feed dog-4 raw animal products: My veterinarian?
Q2.25d4_8	What made you choose to feed dog-4 raw animal products: A veterinary resource other than my veterinarian?
Q2.25d4_9	What made you choose to feed dog-4 raw animal products: I try not to consume processed foods and do not want my pet to consume them either?
Q2.25d4_10	What made you choose to feed dog-4 raw animal products: To prevent food allergies?
Q2.25d4_11	What made you choose to feed dog-4 raw animal products: To improve dental or oral hygiene?
Q2.25d4_12	What made you choose to feed dog-4 raw animal products: To improve the skin or coat?
Q2.25d4_13	What made you choose to feed dog-4 raw animal products: To improve my pet's immune system?
Q2.25d4_14	What made you choose to feed dog-4 raw animal products: Feeding a raw animal product diet is healthier?
Q2.25d4_15	What made you choose to feed dog-4 raw animal products: Feeding a raw animal product diet is more natural?
Q2.25d4_16	What made you choose to feed dog-4 raw animal products: My pet prefers a raw animal product diet?
Q2.25d4_17	What made you choose to feed dog-4 raw animal products: Other reason?
Q2.25d4_17_TEXT	What made you choose to feed dog-4 raw animal products: Other reason-TEXT?
Q2.25d5_4	What made you choose to feed dog-5 raw animal products: Concern about safety/quality control/nutritional value of commercial foods?
Q2.25d5_5	What made you choose to feed dog-5 raw animal products: Discussion with a friend or family member?
Q2.25d5_6	What made you choose to feed dog-5 raw animal products: Read about raw animal products (RAP) on a message board or website?
Q2.25d5_7	What made you choose to feed dog-5 raw animal products: My veterinarian?
Q2.25d5_8	What made you choose to feed dog-5 raw animal products: A veterinary resource other than my veterinarian?
Q2.25d5_9	What made you choose to feed dog-5 raw animal products: I try not to consume processed foods and do not want my pet to consume them either?
Q2.25d5_10	What made you choose to feed dog-5 raw animal products: To prevent food allergies?
Q2.25d5_11	What made you choose to feed dog-5 raw animal products: To improve dental or oral hygiene?
Q2.25d5_12	What made you choose to feed dog-5 raw animal products: To improve the skin or coat?
Q2.25d5_13	What made you choose to feed dog-5 raw animal products: To improve my pet's immune system?
Q2.25d5_14	What made you choose to feed dog-5 raw animal products: Feeding a raw animal product diet is healthier?
Q2.25d5_15	What made you choose to feed dog-5 raw animal products: Feeding a raw animal product diet is more natural?
Q2.25d5_16	What made you choose to feed dog-5 raw animal products: My pet prefers a raw animal product diet?
Q2.25d5_17	What made you choose to feed dog-5 raw animal products: Other reason?
Q2.25d5_17_TEXT	What made you choose to feed dog-5 raw animal products: Other reason-TEXT?
Q2.25d6_4	What made you choose to feed dog-6 raw animal products: Concern about safety/quality control/nutritional value of commercial foods?
Q2.25d6_5	What made you choose to feed dog-6 raw animal products: Discussion with a friend or family member?
Q2.25d6_6	What made you choose to feed dog-6 raw animal products: Read about raw animal products (RAP) on a message board or website?
Q2.25d6_7	What made you choose to feed dog-6 raw animal products: My veterinarian?
Q2.25d6_8	What made you choose to feed dog-6 raw animal products: A veterinary resource other than my veterinarian?
Q2.25d6_9	What made you choose to feed dog-6 raw animal products: I try not to consume processed foods and do not want my pet to consume them either?
Q2.25d6_10	What made you choose to feed dog-6 raw animal products: To prevent food allergies?
Q2.25d6_11	What made you choose to feed dog-6 raw animal products: To improve dental or oral hygiene?
Q2.25d6_12	What made you choose to feed dog-6 raw animal products: To improve the skin or coat?
Q2.25d6_13	What made you choose to feed dog-6 raw animal products: To improve my pet's immune system?
Q2.25d6_14	What made you choose to feed dog-6 raw animal products: Feeding a raw animal product diet is healthier?
Q2.25d6_15	What made you choose to feed dog-6 raw animal products: Feeding a raw animal product diet is more natural?
Q2.25d6_16	What made you choose to feed dog-6 raw animal products: My pet prefers a raw animal product diet?
Q2.25d6_17	What made you choose to feed dog-6 raw animal products: Other reason?
Q2.25d6_17_TEXT	What made you choose to feed dog-6 raw animal products: Other reason-TEXT?
Q2.25d7_4	What made you choose to feed dog-7 raw animal products: Concern about safety/quality control/nutritional value of commercial foods?
Q2.25d7_5	What made you choose to feed dog-7 raw animal products: Discussion with a friend or family member?
Q2.25d7_6	What made you choose to feed dog-7 raw animal products: Read about raw animal products (RAP) on a message board or website?
Q2.25d7_7	What made you choose to feed dog-7 raw animal products: My veterinarian?
Q2.25d7_8	What made you choose to feed dog-7 raw animal products: A veterinary resource other than my veterinarian?
Q2.25d7_9	What made you choose to feed dog-7 raw animal products: I try not to consume processed foods and do not want my pet to consume them either?
Q2.25d7_10	What made you choose to feed dog-7 raw animal products: To prevent food allergies?
Q2.25d7_11	What made you choose to feed dog-7 raw animal products: To improve dental or oral hygiene?
Q2.25d7_12	What made you choose to feed dog-7 raw animal products: To improve the skin or coat?
Q2.25d7_13	What made you choose to feed dog-7 raw animal products: To improve my pet's immune system?
Q2.25d7_14	What made you choose to feed dog-7 raw animal products: Feeding a raw animal product diet is healthier?
Q2.25d7_15	What made you choose to feed dog-7 raw animal products: Feeding a raw animal product diet is more natural?
Q2.25d7_16	What made you choose to feed dog-7 raw animal products: My pet prefers a raw animal product diet?
Q2.25d7_17	What made you choose to feed dog-7 raw animal products: Other reason?
Q2.25d7_17_TEXT	What made you choose to feed dog-7 raw animal products: Other reason-TEXT?
Q2.25d8_4	What made you choose to feed dog-8 raw animal products: Concern about safety/quality control/nutritional value of commercial foods?
Q2.25d8_5	What made you choose to feed dog-8 raw animal products: Discussion with a friend or family member?
Q2.25d8_6	What made you choose to feed dog-8 raw animal products: Read about raw animal products (RAP) on a message board or website?
Q2.25d8_7	What made you choose to feed dog-8 raw animal products: My veterinarian?
Q2.25d8_8	What made you choose to feed dog-8 raw animal products: A veterinary resource other than my veterinarian?
Q2.25d8_9	What made you choose to feed dog-8 raw animal products: I try not to consume processed foods and do not want my pet to consume them either?
Q2.25d8_10	What made you choose to feed dog-8 raw animal products: To prevent food allergies?
Q2.25d8_11	What made you choose to feed dog-8 raw animal products: To improve dental or oral hygiene?
Q2.25d8_12	What made you choose to feed dog-8 raw animal products: To improve the skin or coat?
Q2.25d8_13	What made you choose to feed dog-8 raw animal products: To improve my pet's immune system?
Q2.25d8_14	What made you choose to feed dog-8 raw animal products: Feeding a raw animal product diet is healthier?
Q2.25d8_15	What made you choose to feed dog-8 raw animal products: Feeding a raw animal product diet is more natural?
Q2.25d8_16	What made you choose to feed dog-8 raw animal products: My pet prefers a raw animal product diet?
Q2.25d8_17	What made you choose to feed dog-8 raw animal products: Other reason?
Q2.25d8_17_TEXT	What made you choose to feed dog-8 raw animal products: Other reason-TEXT?
Q2.25d9_4	What made you choose to feed dog-9 raw animal products: Concern about safety/quality control/nutritional value of commercial foods?
Q2.25d9_5	What made you choose to feed dog-9 raw animal products: Discussion with a friend or family member?
Q2.25d9_6	What made you choose to feed dog-9 raw animal products: Read about raw animal products (RAP) on a message board or website?
Q2.25d9_7	What made you choose to feed dog-9 raw animal products: My veterinarian?
Q2.25d9_8	What made you choose to feed dog-9 raw animal products: A veterinary resource other than my veterinarian?
Q2.25d9_9	What made you choose to feed dog-9 raw animal products: I try not to consume processed foods and do not want my pet to consume them either?
Q2.25d9_10	What made you choose to feed dog-9 raw animal products: To prevent food allergies?
Q2.25d9_11	What made you choose to feed dog-9 raw animal products: To improve dental or oral hygiene?
Q2.25d9_12	What made you choose to feed dog-9 raw animal products: To improve the skin or coat?
Q2.25d9_13	What made you choose to feed dog-9 raw animal products: To improve my pet's immune system?
Q2.25d9_14	What made you choose to feed dog-9 raw animal products: Feeding a raw animal product diet is healthier?
Q2.25d9_15	What made you choose to feed dog-9 raw animal products: Feeding a raw animal product diet is more natural?
Q2.25d9_16	What made you choose to feed dog-9 raw animal products: My pet prefers a raw animal product diet?
Q2.25d9_17	What made you choose to feed dog-9 raw animal products: Other reason?
Q2.25d9_17_TEXT	What made you choose to feed dog-9 raw animal products: Other reason-TEXT?
Q2.25d10_4	What made you choose to feed dog-10 raw animal products: Concern about safety/quality control/nutritional value of commercial foods?
Q2.25d10_5	What made you choose to feed dog-10 raw animal products: Discussion with a friend or family member?
Q2.25d10_6	What made you choose to feed dog-10 raw animal products: Read about raw animal products (RAP) on a message board or website?
Q2.25d10_7	What made you choose to feed dog-10 raw animal products: My veterinarian?
Q2.25d10_8	What made you choose to feed dog-10 raw animal products: A veterinary resource other than my veterinarian?
Q2.25d10_9	What made you choose to feed dog-10 raw animal products: I try not to consume processed foods and do not want my pet to consume them either?
Q2.25d10_10	What made you choose to feed dog-10 raw animal products: To prevent food allergies?
Q2.25d10_11	What made you choose to feed dog-10 raw animal products: To improve dental or oral hygiene?
Q2.25d10_12	What made you choose to feed dog-10 raw animal products: To improve the skin or coat?
Q2.25d10_13	What made you choose to feed dog-10 raw animal products: To improve my pet's immune system?
Q2.25d10_14	What made you choose to feed dog-10 raw animal products: Feeding a raw animal product diet is healthier?
Q2.25d10_15	What made you choose to feed dog-10 raw animal products: Feeding a raw animal product diet is more natural?
Q2.25d10_16	What made you choose to feed dog-10 raw animal products: My pet prefers a raw animal product diet?
Q2.25d10_17	What made you choose to feed dog-10 raw animal products: Other reason?
Q2.25d10_17_TEXT	What made you choose to feed dog-10 raw animal products: Other reason-TEXT?
Q2.26_1_1	How frequently does this pet eat raw animal products: cat-1?
Q2.26_1_2	How frequently does this pet eat raw animal products: cat-2?
Q2.26_1_3	How frequently does this pet eat raw animal products: cat-3?
Q2.26_1_4	How frequently does this pet eat raw animal products: cat-4?
Q2.26_1_5	How frequently does this pet eat raw animal products: cat-5?
Q2.26_1_6	How frequently does this pet eat raw animal products: cat-6?
Q2.26_1_7	How frequently does this pet eat raw animal products: cat-7?
Q2.26_1_8	How frequently does this pet eat raw animal products: cat-8?
Q2.26_1_9	How frequently does this pet eat raw animal products: cat-9?
Q2.26_1_10	How frequently does this pet eat raw animal products: cat-10?
Q2.26_1_11	How frequently does this pet eat raw animal products: dog-1?
Q2.26_1_12	How frequently does this pet eat raw animal products: dog-2?
Q2.26_1_13	How frequently does this pet eat raw animal products: dog-3?
Q2.26_1_14	How frequently does this pet eat raw animal products: dog-4?
Q2.26_1_15	How frequently does this pet eat raw animal products: dog-5?
Q2.26_1_16	How frequently does this pet eat raw animal products: dog-6?
Q2.26_1_17	How frequently does this pet eat raw animal products: dog-7?
Q2.26_1_18	How frequently does this pet eat raw animal products: dog-8?
Q2.26_1_19	How frequently does this pet eat raw animal products: dog-9?
Q2.26_1_20	How frequently does this pet eat raw animal products: dog-10?
q3.1	Before this survey were you familiar with the practice of pet owners feeding raw animal products?
q3.2_1	Where did you first learn about feeding raw animal product diets for pets: Breeder instructions or advice
q3.2_2	Where did you first learn about feeding raw animal product diets for pets: Internet
q3.2_3	Where did you first learn about feeding raw animal product diets for pets: Friend/family member
q3.2_4	Where did you first learn about feeding raw animal product diets for pets: Magazine
q3.2_5	Where did you first learn about feeding raw animal product diets for pets: Book
q3.2_6	Where did you first learn about feeding raw animal product diets for pets: Pet store employee
q3.2_7	Where did you first learn about feeding raw animal product diets for pets: My veterinarian
q3.2_8	Where did you first learn about feeding raw animal product diets for pets: Email group
q3.2_9	Where did you first learn about feeding raw animal product diets for pets: Book, magazine or other printed source written by a veterinarian other than your own
q3.3_1	How did you decide what or how much raw animal product to feed your pet(s): Consult with a nutritionist or veterinarian
q3.3_2	How did you decide what or how much raw animal product to feed your pet(s): Used a published reference source
q3.3_3	How did you decide what or how much raw animal product to feed your pet(s): Used information from an online resource
q3.3_4	How did you decide what or how much raw animal product to feed your pet(s): Friend/family member
q3.3_5	How did you decide what or how much raw animal product to feed your pet(s): Breeder
q3.3_6	How did you decide what or how much raw animal product to feed your pet(s): Pet store personnel
q3.3_7	How did you decide what or how much raw animal product to feed your pet(s): Decided proportions and composition based on availability
q3.4	Have you ever told a veterinarian that your pet is fed a raw animal product diet?
q3.5	What was the veterinarian's response to including raw animal products in your pet's diet?
q3.6_1	What precautions are taken to prevent disease transmission when preparing raw animal product meals for your pet: Cleaning and disinfecting all bowls and surfaces that have come into contact with the pet and its food daily
q3.6_2	What precautions are taken to prevent disease transmission when preparing raw animal product meals for your pet: Washing hands after preparing food or handling pet
q3.6_3	What precautions are taken to prevent disease transmission when preparing raw animal product meals for your pet: Not allowing pet to lick others and not kissing pet
q3.6_4	What precautions are taken to prevent disease transmission when preparing raw animal product meals for your pet: Not allowing pet in human dining areas
q3.6_5	What precautions are taken to prevent disease transmission when preparing raw animal product meals for your pet: No precautions
q3.7	Do you have any concerns regarding potential bacterial or parasite transmission from feeding your pet raw animal products?
q4.1	How much do you trust the advice of veterinarians in general?
q4.2	With respect to pet nutrition, to what extent do you trust veterinarians as a knowledgeable resource?
q4.3_1	How important is the role of nutrition to the health of your pet(s)?
q4.3_2	How important is pet stool consistency, volume, or odor in your choice of a diet for your pet?
q4.3_3	How important is pet dental/oral health in your choice of a diet for your pet?
q4.3_4	How important is pet skin/coat health in your choice of a diet for your pet?
q4.3_5	How important is muscle mass/strength in your choice of a diet for your pet?
q4.8_1	Do you generally consider vaccinations recommended by your veterinarian to be...
q4.8_2	Do you generally consider flea and tick prevention to be...
q4.8_3	Do you generally consider deworming and heartworm prevention to be...
q4.8_4	Do you generally consider natural/organic pet foods to be...
q4.8_5	Do you generally consider grain (corn, wheat etc.) in pet foods to be...
q4.8_6	Do you generally consider animal by-products in pet foods to be...
q4.8_7	Do you generally consider meat as the first ingredient in pet foods to be...
q4.8_8	Do you generally consider soy, gluten, and other vegetable proteins in pet foods to be...
q4.8_9	Do you generally consider routine checks for worms and other parasites to be...
q5.1_1	Please indicate your level of agreement with the statements below: Eating organic or all-natural foods are important to me.
q5.1_2	Please indicate your level of agreement with the statements below: I am very conscious of what I eat and where it comes from.
q5.1_3	Please indicate your level of agreement with the statements below: I feel that I am knowledgeable about my pet's nutrition.
q5.1_4	Please indicate your level of agreement with the statements below: I feel that I am knowledgeable about my nutrition.
q5.1_5	Please indicate your level of agreement with the statements below: Grains are a common source of health problems in people.
q5.1_6	Please indicate your level of agreement with the statements below: Grains are a common source of health problems in animals.
q5.1_7	Please indicate your level of agreement with the statements below: I feel that proper nutrition is very important for both me and my pets.
q5.1_8	Please indicate your level of agreement with the statements below: I am interested in learning more about appropriate nutrition for my pets.
q6.1_1_1	Which of the following small animal nutrition references are you familiar with and which have you consulted about pet nutrition: Association of American Feed Control Officials Publications - Familiar With
q6.1_1_2	Which of the following small animal nutrition references are you familiar with and which have you consulted about pet nutrition: Association of American Feed Control Officials Publications.-Consulted
q6.1_2_1	Which of the following small animal nutrition references are you familiar with and which have you consulted about pet nutrition: National Research Council: Nutrient Requirements for Dogs and Cats - Familiar With
q6.1_2_2	Which of the following small animal nutrition references are you familiar with and which have you consulted about pet nutrition: National Research Council: Nutrient Requirements for Dogs and Cats - Consulted
q6.1_3_1	Which of the following small animal nutrition references are you familiar with and which have you consulted about pet nutrition: Small Animal Clinical Nutrition, or similar texts for professionals - Familiar With
q6.1_3_2	Which of the following small animal nutrition references are you familiar with and which have you consulted about pet nutrition: Small Animal Clinical Nutrition, or similar texts for professionals - Consulted
q6.1_4_1	Which of the following small animal nutrition references are you familiar with and which have you consulted about pet nutrition: Professional websites - Familiar With
q6.1_4_2	Which of the following small animal nutrition references are you familiar with and which have you consulted about pet nutrition: Professional websites - Consulted
q6.2	Are there any other pet nutrition references you consult?
q6.2_TEXT	Are there any other pet nutrition references you consult-TEXT
q7.1	How many hours per day are you online?
q7.2	What is your gender?
q7.3	What is your age?
q7.4	Marital/child status
q7.5	What is your highest level of education?
q7.6	Do you live in an urban, rural, or suburban area?
q7.7	Please provide any additional information you feel would be helpful in helping us understand the nutritional and feeding choices you make for your pet(s).

## Sheet: VetMed_RawFood_combined
V10	Q1.1_10	Q1.1_11	Q1.1_12	Q1.1c_1	Q1.1d_1	q3.1	q3.2_1	q3.2_2	q3.2_3	q3.2_4	q3.2_5	q3.2_6	q3.2_7	q3.2_8	q3.2_9	q3.3_1	q3.3_2	q3.3_3	q3.3_4	q3.3_5	q3.3_6	q3.3_7	q4.1	q4.2	q4.8_1	q4.8_2	q4.8_3	q4.8_9	q5.1_1	q5.1_2	q5.1_3	q5.1_4	q5.1_5	q5.1_6	q5.1_7	q5.1_8	q6.1_1_1	q6.1_1_2	q6.1_2_1	q6.1_2_2	q6.1_3_1	q6.1_3_2	q6.1_4_1	q6.1_4_2	q6.2	q6.2_TEXT	q7.1	q7.2	q7.3
1		Selected	Selected	1	2	Yes		Internet			Book												Very much	Somewhat	Beneficial	Beneficial	Beneficial	Beneficial	Disagree Strongly	Agree Somewhat	Agree Strongly	Agree Strongly	Disagree Strongly	Disagree Strongly	Agree Strongly	Agree Strongly	Familiar With Association of American Feed Control Officials Publications	Consulted Association of American Feed Control Officials Publications							No		1-2 hours per day	Female	18-30
1			Selected		3	No																	Somewhat	A little	Beneficial	Beneficial	Beneficial	Beneficial	Agree Somewhat	Agree Strongly	Agree Somewhat	Agree Somewhat			Agree Strongly	Agree Strongly							Familiar With Professional websites		No		1-2 hours per day	Female	31-40
1			Selected		3	Yes	Breeder instructions or advice		Friend/family member					Email group	Book, magazine or other printed source written by a veterinarian other than your own		Used a published reference source		Friend/family member	Breeder			Somewhat	Not very much	Unnecessary	Unnecessary	Beneficial	Beneficial	Agree Strongly	Agree Strongly	Agree Strongly	Agree Somewhat	Agree Strongly	Agree Strongly	Agree Strongly	Agree Strongly	Familiar With Association of American Feed Control Officials Publications		Familiar With National Research Council: Nutrient Requirements for Dogs and Cats		Familiar With Small Animal Clinical Nutrition, or similar texts for professionals		Familiar With Professional websites		No		1-2 hours per day	Female	51-60
1		Selected	Selected	1	2	Yes					Book						Used a published reference source						Somewhat	Not very much	Harmful	Harmful	Harmful	Beneficial	Agree Strongly	Agree Strongly	Agree Strongly	Agree Strongly	Don't Know	Agree Strongly	Agree Strongly		Familiar With Association of American Feed Control Officials Publications	Consulted Association of American Feed Control Officials Publications	Familiar With National Research Council: Nutrient Requirements for Dogs and Cats	Consulted National Research Council: Nutrient Requirements for Dogs and Cats	Familiar With Small Animal Clinical Nutrition, or similar texts for professionals	Consulted Small Animal Clinical Nutrition, or similar texts for professionals	Familiar With Professional websites	Consulted Professional websites	Yes (Please specify)	Dr. Doug Kneuven, Dr. Marty Goldstein, Rodney Habib, Dog's Naturally Magazine, Truth About pet Food	More than 2 hours per day	Female	51-60
1			Selected		1	No																	Very much	Somewhat	Beneficial	Beneficial	Beneficial		Agree Strongly	Agree Strongly	Agree Strongly	Agree Strongly																	18-30
1			Selected		4	Yes			Friend/family member													Decided proportions and composition based on availability	Very much	Very much	Beneficial	Beneficial	Beneficial	Beneficial	Disagree Somewhat	Disagree Somewhat	Agree Somewhat	Agree Somewhat	Agree Somewhat	Don't Know	Agree Strongly	Agree Strongly									No		More than 2 hours per day	Female	41-50
1			Selected		1	Yes							My veterinarian	Email group									Very much	Very much	Beneficial	Beneficial	Beneficial	Beneficial	Disagree Somewhat	Disagree Somewhat	Agree Strongly	Agree Somewhat	Disagree Somewhat	Disagree Somewhat	Agree Strongly	Agree Somewhat	Familiar With Association of American Feed Control Officials Publications		Familiar With National Research Council: Nutrient Requirements for Dogs and Cats		Familiar With Small Animal Clinical Nutrition, or similar texts for professionals		Familiar With Professional websites		No		More than 2 hours per day	Female	51-60
1		Selected	Selected	1	1	Yes		Internet															Very much	Very much	Beneficial	Unnecessary	Unnecessary	Unnecessary	Disagree Somewhat	Agree Somewhat	Agree Somewhat	Agree Somewhat	Agree Somewhat	Disagree Somewhat	Agree Strongly	Disagree Strongly											Less than one hour per day	Male	41-50
1		Selected		4		Yes							My veterinarian		Book, magazine or other printed source written by a veterinarian other than your own		Used a published reference source	Used information from an online resource					Not very much	Not very much	Harmful			Unnecessary	Agree Strongly	Agree Strongly	Agree Strongly	Agree Strongly	Agree Strongly	Agree Strongly	Agree Strongly	Agree Strongly	Familiar With Association of American Feed Control Officials Publications		Familiar With National Research Council: Nutrient Requirements for Dogs and Cats		Familiar With Small Animal Clinical Nutrition, or similar texts for professionals		Familiar With Professional websites		Yes (Please specify)	cat info.org; Little Big Cat; cat nutrition.com	1-2 hours per day	Female	61 or older
1		Selected		2		Yes			Friend/family member														Very much	Not very much	Beneficial	Beneficial	Beneficial	Beneficial	Agree Somewhat	Agree Somewhat	Disagree Strongly	Agree Somewhat	Don't Know	Agree Strongly	Agree Strongly	Agree Strongly											More than 2 hours per day	Female	18-30
1		Selected	Selected	1	2	Yes		Internet	Friend/family member						Book, magazine or other printed source written by a veterinarian other than your own			Used information from an online resource	Friend/family member				Very much	Somewhat	Beneficial	Unnecessary	Beneficial	Beneficial	Agree Strongly	Agree Strongly	Agree Strongly	Agree Strongly	Agree Strongly	Agree Strongly	Agree Strongly	Agree Strongly								Consulted Professional websites	Yes (Please specify)	books	More than 2 hours per day	Female	41-50
1		Selected	Selected	4	2	Yes		Internet			Book				Book, magazine or other printed source written by a veterinarian other than your own		Used a published reference source	Used information from an online resource					Not very much	Not very much	Harmful	Harmful	Harmful	Beneficial	Agree Strongly	Agree Strongly	Agree Strongly	Agree Strongly	Agree Somewhat	Agree Strongly	Agree Strongly	Agree Somewhat	Familiar With Association of American Feed Control Officials Publications		Familiar With National Research Council: Nutrient Requirements for Dogs and Cats		Familiar With Small Animal Clinical Nutrition, or similar texts for professionals		Familiar With Professional websites		Yes (Please specify)	Holistic vets, books, research documents not funded by big ag and pet food corporations	More than 2 hours per day	Female	31-40
1		Selected		8		Yes		Internet										Used information from an online resource					Somewhat	A little	Harmful	Harmful	Beneficial	Beneficial	Agree Strongly	Agree Somewhat	Agree Strongly	Agree Somewhat	Agree Somewhat	Agree Strongly	Agree Strongly	Agree Strongly								Consulted Professional websites	Yes (Please specify)	Feline Nutrition Education Society, Dr. Lisa Pierson, cat-info.org	More than 2 hours per day	Female	41-50
1			Selected		5	Yes			Friend/family member														Very much	Not very much	Unnecessary	Unnecessary	Unnecessary	Beneficial	Agree Somewhat	Agree Somewhat	Agree Strongly	Agree Somewhat	Don't Know	Don't Know	Agree Strongly	Disagree Strongly									No		More than 2 hours per day	Female	61 or older
1		Selected	Selected	1	1	Yes			Friend/family member									Used information from an online resource	Friend/family member				Somewhat	Not very much	Unnecessary	Beneficial	Beneficial	Beneficial	Agree Somewhat	Agree Somewhat	Agree Somewhat	Agree Somewhat	Agree Somewhat	Agree Strongly	Agree Strongly	Agree Strongly									No		More than 2 hours per day	Female	31-40
1			Selected		4	Yes		Internet										Used information from an online resource	Friend/family member			Decided proportions and composition based on availability	Somewhat	Somewhat	Beneficial	Beneficial		Beneficial	Agree Strongly	Agree Strongly	Agree Strongly	Agree Strongly	Agree Somewhat	Agree Strongly	Agree Strongly	Agree Strongly											1-2 hours per day	Female	18-30
1		Selected	Selected	2	2	Yes	Breeder instructions or advice	Internet	Friend/family member					Email group					Friend/family member				Somewhat	Somewhat	Beneficial	Beneficial	Beneficial	Beneficial	Agree Somewhat	Agree Strongly	Agree Somewhat	Agree Somewhat	Agree Somewhat	Agree Somewhat	Agree Strongly	Agree Strongly							Familiar With Professional websites				1-2 hours per day	Female	61 or older
1			Selected		1	Yes			Friend/family member							Consult with a nutritionist or veterinarian							Somewhat	Somewhat	Unnecessary	Unnecessary	Beneficial	Beneficial	Agree Strongly	Agree Strongly	Agree Somewhat	Agree Strongly	Disagree Somewhat	Disagree Somewhat	Agree Strongly	Agree Strongly	Familiar With Association of American Feed Control Officials Publications		Familiar With National Research Council: Nutrient Requirements for Dogs and Cats		Familiar With Small Animal Clinical Nutrition, or similar texts for professionals		Familiar With Professional websites		Yes (Please specify)	Whole Dog Journal, Conference lectures on nutirution delivered by canine nutrition specialists (PhDs). I also have four veterinarians due to travel, so talk with more than one vet	1-2 hours per day	Female	51-60
1			Selected		2	Yes							My veterinarian										Very much	Somewhat	Beneficial	Beneficial	Beneficial	Beneficial	Agree Somewhat	Agree Somewhat	Agree Somewhat	Agree Somewhat	Disagree Somewhat	Disagree Somewhat	Agree Strongly	Agree Strongly			Familiar With National Research Council: Nutrient Requirements for Dogs and Cats		Familiar With Small Animal Clinical Nutrition, or similar texts for professionals		Familiar With Professional websites		No		More than 2 hours per day	Male	18-30
1			Selected		1	Yes		Internet			Book				Book, magazine or other printed source written by a veterinarian other than your own		Used a published reference source						Somewhat	A little	Unnecessary	Beneficial	Unnecessary	Unnecessary	Agree Somewhat	Agree Somewhat	Agree Strongly	Agree Somewhat	Don't Know	Agree Somewhat	Agree Strongly	Agree Strongly		Consulted Association of American Feed Control Officials Publications		Consulted National Research Council: Nutrient Requirements for Dogs and Cats	Familiar With Small Animal Clinical Nutrition, or similar texts for professionals		Familiar With Professional websites		No		1-2 hours per day	Female	41-50
1			Selected		1	No																	Somewhat	Not very much	Harmful	Harmful	Harmful	Beneficial	Agree Strongly	Agree Strongly	Agree Strongly	Agree Strongly	Agree Strongly	Agree Strongly	Agree Strongly	Disagree Strongly	Familiar With Association of American Feed Control Officials Publications		Familiar With National Research Council: Nutrient Requirements for Dogs and Cats		Familiar With Small Animal Clinical Nutrition, or similar texts for professionals		Familiar With Professional websites		No		More than 2 hours per day	Female	51-60
1		Selected	Selected	1	1	Yes		Internet			Book			Email group			Used a published reference source	Used information from an online resource					A little	Not very much	Harmful	Beneficial	Beneficial	Beneficial	Agree Somewhat	Agree Strongly	Agree Strongly	Agree Strongly	Agree Somewhat	Agree Strongly	Agree Strongly	Agree Strongly	Familiar With Association of American Feed Control Officials Publications		Familiar With National Research Council: Nutrient Requirements for Dogs and Cats		Familiar With Small Animal Clinical Nutrition, or similar texts for professionals	Consulted Small Animal Clinical Nutrition, or similar texts for professionals	Familiar With Professional websites	Consulted Professional websites	No		More than 2 hours per day	Female	61 or older
1			Selected		3	Yes			Friend/family member							Consult with a nutritionist or veterinarian							Somewhat	Somewhat	Unnecessary	Beneficial	Beneficial	Beneficial	Agree Strongly	Agree Somewhat	Agree Strongly	Agree Somewhat	Agree Somewhat	Agree Somewhat	Agree Strongly	Agree Strongly									No		More than 2 hours per day	Female	31-40
1			Selected		1	Yes		Internet	Friend/family member	Magazine	Book		My veterinarian		Book, magazine or other printed source written by a veterinarian other than your own	Consult with a nutritionist or veterinarian							Somewhat	Not very much	Harmful	Harmful	Harmful	Beneficial	Agree Somewhat	Agree Strongly	Agree Strongly	Agree Strongly	Disagree Somewhat	Agree Somewhat	Agree Strongly	Disagree Strongly	Familiar With Association of American Feed Control Officials Publications						Familiar With Professional websites		Yes (Please specify)	books, magazines, friends, my holistic veterinarian,	More than 2 hours per day		51-60
1			Selected		2	Yes		Internet			Book					Consult with a nutritionist or veterinarian							Somewhat	Somewhat	Harmful	Harmful	Beneficial	Beneficial	Agree Strongly	Agree Strongly	Agree Somewhat	Agree Somewhat	Agree Somewhat	Agree Somewhat	Agree Strongly	Agree Somewhat							Familiar With Professional websites		Yes (Please specify)	Dr. Karen Becker - Real Food for Healthy Pets, Dr. Ian Billinghurst - Give Your Dog a Bone, Whole Dog Journal	1-2 hours per day	Female	51-60
1		Selected		2		Yes			Friend/family member							Consult with a nutritionist or veterinarian			Friend/family member				Somewhat	Somewhat	Beneficial	Beneficial	Beneficial	Beneficial	Agree Strongly	Agree Strongly	Agree Strongly	Agree Strongly	Agree Somewhat	Agree Strongly	Don't Know	Agree Strongly											More than 2 hours per day	Male	18-30
1			Selected		4	Yes					Book						Used a published reference source						Somewhat	Not very much	Beneficial	Beneficial	Beneficial	Beneficial	Agree Somewhat	Agree Somewhat	Agree Strongly	Agree Strongly	Disagree Somewhat	Disagree Somewhat	Agree Strongly	Disagree Somewhat									No		More than 2 hours per day	Female	51-60
1		Selected	Selected	2	2	Yes			Friend/family member														Very much	Very much	Beneficial	Beneficial	Beneficial	Beneficial	Agree Strongly	Agree Strongly	Agree Strongly	Agree Strongly	Don't Know	Don't Know	Agree Strongly	Disagree Somewhat									No		1-2 hours per day	Female	41-50
1			Selected		1	Yes		Internet										Used information from an online resource	Friend/family member				Very much	Somewhat	Beneficial	Beneficial	Beneficial	Beneficial	Agree Somewhat	Agree Somewhat	Agree Somewhat	Agree Somewhat	Disagree Somewhat	Agree Somewhat	Agree Strongly	Agree Strongly							Familiar With Professional websites	Consulted Professional websites	No		More than 2 hours per day	Female	61 or older
1		Selected	Selected	3	1	Yes			Friend/family member						Book, magazine or other printed source written by a veterinarian other than your own								Somewhat	Not very much	Beneficial	Beneficial	Harmful	Beneficial	Agree Strongly	Agree Strongly	Agree Somewhat	Agree Strongly	Agree Strongly	Agree Strongly	Agree Strongly	Agree Strongly									Yes (Please specify)	facebook pages	More than 2 hours per day	Female	41-50
1			Selected		2	Yes							My veterinarian			Consult with a nutritionist or veterinarian							A little	Not very much	Harmful	Harmful	Harmful	Beneficial	Disagree Strongly	Agree Somewhat	Agree Strongly	Agree Strongly	Agree Strongly	Agree Strongly	Agree Strongly	Agree Strongly	Familiar With Association of American Feed Control Officials Publications						Familiar With Professional websites		No		More than 2 hours per day	Female	61 or older
1		Selected	Selected	1	2	Yes		Internet										Used information from an online resource					Somewhat	A little	Beneficial	Beneficial	Beneficial	Beneficial	Agree Somewhat	Agree Somewhat	Agree Strongly	Agree Strongly	Agree Somewhat	Agree Strongly	Agree Strongly	Don't Know								Consulted Professional websites			More than 2 hours per day	Female	18-30
1			Selected		3	Yes			Friend/family member	Magazine				Email group				Used information from an online resource					Somewhat	A little	Beneficial	Beneficial	Beneficial	Beneficial	Agree Strongly	Agree Somewhat	Agree Somewhat	Agree Strongly	Don't Know	Don't Know	Agree Strongly	Agree Strongly							Familiar With Professional websites		No		More than 2 hours per day	Female	41-50
1			Selected		2	Yes		Internet	Friend/family member	Magazine	Book					Consult with a nutritionist or veterinarian							Somewhat	A little	Unnecessary	Beneficial	Beneficial	Beneficial	Agree Strongly	Agree Strongly	Agree Strongly	Agree Strongly	Disagree Somewhat	Agree Somewhat	Agree Strongly	Agree Strongly									No		1-2 hours per day	Female	61 or older
1		Selected	Selected	5	4	Yes			Friend/family member								Used a published reference source	Used information from an online resource	Friend/family member	Breeder			Very much	Somewhat	Unnecessary	Beneficial	Beneficial	Beneficial	Agree Strongly	Agree Strongly	Agree Strongly	Agree Strongly	Agree Strongly	Agree Strongly	Agree Strongly	Agree Strongly	Familiar With Association of American Feed Control Officials Publications		Familiar With National Research Council: Nutrient Requirements for Dogs and Cats	Consulted National Research Council: Nutrient Requirements for Dogs and Cats			Familiar With Professional websites	Consulted Professional websites	No		More than 2 hours per day	Female	51-60
1			Selected		4	Yes	Breeder instructions or advice		Friend/family member														Somewhat	Somewhat	Beneficial	Beneficial	Beneficial	Beneficial	Agree Somewhat	Agree Somewhat	Agree Strongly	Agree Somewhat	Don't Know	Don't Know	Agree Strongly	Don't Know									No		Less than one hour per day	Female	61 or older
1		Selected		2		Yes		Internet						Email group				Used information from an online resource	Friend/family member				Very much	Somewhat	Beneficial	Beneficial	Beneficial	Beneficial	Agree Somewhat	Agree Somewhat	Agree Strongly	Agree Strongly	Disagree Somewhat	Agree Somewhat	Agree Strongly	Agree Strongly	Familiar With Association of American Feed Control Officials Publications				Familiar With Small Animal Clinical Nutrition, or similar texts for professionals		Familiar With Professional websites		No		1-2 hours per day	Female	51-60
1			Selected		2	Yes			Friend/family member		Book				Book, magazine or other printed source written by a veterinarian other than your own							Decided proportions and composition based on availability	Somewhat	Not very much	Beneficial	Beneficial	Beneficial	Beneficial	Agree Strongly	Agree Strongly	Agree Strongly	Agree Strongly	Agree Somewhat	Agree Somewhat	Agree Strongly	Agree Strongly	Familiar With Association of American Feed Control Officials Publications		Familiar With National Research Council: Nutrient Requirements for Dogs and Cats		Familiar With Small Animal Clinical Nutrition, or similar texts for professionals		Familiar With Professional websites		Yes (Please specify)	Whole Dog Journal	1-2 hours per day	Female	51-60
1			Selected		3	Yes		Internet	Friend/family member		Book					Consult with a nutritionist or veterinarian	Used a published reference source	Used information from an online resource	Friend/family member				Somewhat	Not very much	Beneficial	Beneficial	Beneficial	Beneficial	Agree Strongly	Agree Somewhat	Agree Strongly	Agree Strongly	Don't Know	Agree Strongly	Agree Strongly	Disagree Somewhat											1-2 hours per day	Female	61 or older
1		Selected	Selected	1	1	Yes		Internet															Very much	Very much	Beneficial	Beneficial	Beneficial	Beneficial	Disagree Strongly	Disagree Somewhat	Disagree Somewhat	Disagree Somewhat	Disagree Somewhat	Don't Know	Agree Strongly	Agree Somewhat	Familiar With Association of American Feed Control Officials Publications				Familiar With Small Animal Clinical Nutrition, or similar texts for professionals				No		1-2 hours per day	Female	18-30
1			Selected		1	Yes	Breeder instructions or advice		Friend/family member							Consult with a nutritionist or veterinarian	Used a published reference source			Breeder			Very much	Very much	Beneficial	Beneficial	Beneficial	Unnecessary	Agree Strongly	Agree Strongly	Agree Strongly	Agree Strongly	Disagree Somewhat	Disagree Somewhat	Agree Strongly	Agree Somewhat			Familiar With National Research Council: Nutrient Requirements for Dogs and Cats	Consulted National Research Council: Nutrient Requirements for Dogs and Cats			Familiar With Professional websites	Consulted Professional websites	Yes (Please specify)	my local trainers	Less than one hour per day	Female	51-60
1			Selected		2	Yes		Internet			Book						Used a published reference source	Used information from an online resource					Somewhat	Not very much	Harmful	Harmful	Beneficial	Unnecessary	Agree Strongly	Agree Strongly	Agree Strongly	Agree Strongly	Agree Somewhat	Agree Strongly	Agree Strongly	Agree Strongly	Familiar With Association of American Feed Control Officials Publications								Yes (Please specify)	many books and articles published by veterinarians	More than 2 hours per day	Female	51-60
1		Selected	Selected	1	2	Yes		Internet	Friend/family member	Magazine													Very much	Very much	Beneficial	Unnecessary	Beneficial	Beneficial	Disagree Somewhat	Agree Somewhat	Agree Strongly	Agree Strongly	Disagree Strongly	Disagree Strongly	Agree Strongly	Agree Strongly	Familiar With Association of American Feed Control Officials Publications	Consulted Association of American Feed Control Officials Publications	Familiar With National Research Council: Nutrient Requirements for Dogs and Cats	Consulted National Research Council: Nutrient Requirements for Dogs and Cats	Familiar With Small Animal Clinical Nutrition, or similar texts for professionals	Consulted Small Animal Clinical Nutrition, or similar texts for professionals	Familiar With Professional websites	Consulted Professional websites	Yes (Please specify)	notes from my nutrition professor (I am a vet student)	1-2 hours per day	Female	31-40
1		Selected	Selected	2	4	Yes		Internet	Friend/family member		Book						Used a published reference source	Used information from an online resource					A little	Not very much	Unnecessary	Beneficial	Unnecessary	Beneficial	Agree Somewhat	Disagree Somewhat	Agree Somewhat	Agree Somewhat	Agree Somewhat	Agree Somewhat	Agree Strongly	Agree Strongly									No		1-2 hours per day	Female	31-40
1		Selected		2		Yes		Internet									Used a published reference source	Used information from an online resource					Very much	A little	Beneficial	Beneficial	Beneficial	Beneficial	Agree Somewhat	Agree Somewhat	Agree Strongly	Agree Somewhat	Disagree Somewhat	Agree Strongly	Agree Strongly	Agree Strongly	Familiar With Association of American Feed Control Officials Publications		Familiar With National Research Council: Nutrient Requirements for Dogs and Cats						Yes (Please specify)	feline-nutrition.org, catcentric.org	More than 2 hours per day	Female	18-30
1			Selected		2	Yes									Book, magazine or other printed source written by a veterinarian other than your own	Consult with a nutritionist or veterinarian	Used a published reference source	Used information from an online resource					Very much	Not very much	Beneficial	Beneficial		Beneficial	Agree Strongly	Agree Strongly	Agree Strongly	Agree Strongly	Agree Somewhat	Agree Somewhat	Agree Strongly	Agree Strongly				Consulted National Research Council: Nutrient Requirements for Dogs and Cats		Consulted Small Animal Clinical Nutrition, or similar texts for professionals			Yes (Please specify)	Canine Nutrigenomics, Unlocking the Canine Ancestral Diet, K9 Kitchen, Optimal Nutrition, Dr.Becker's Real Food For Healthy Dogs, many more	More than 2 hours per day	Female	41-50
1			Selected		3	Yes			Friend/family member									Used information from an online resource					Very much	Not very much	Beneficial	Beneficial	Beneficial	Beneficial	Agree Somewhat	Disagree Somewhat	Agree Strongly	Agree Somewhat	Agree Somewhat	Agree Strongly	Agree Strongly	Agree Strongly	Familiar With Association of American Feed Control Officials Publications		Familiar With National Research Council: Nutrient Requirements for Dogs and Cats		Familiar With Small Animal Clinical Nutrition, or similar texts for professionals		Familiar With Professional websites		No		1-2 hours per day	Female	41-50
1			Selected		1	Yes			Friend/family member														Somewhat	Somewhat	Beneficial	Beneficial	Unnecessary	Beneficial	Disagree Strongly	Disagree Strongly	Disagree Strongly	Agree Somewhat	Disagree Somewhat	Disagree Somewhat	Agree Somewhat	Disagree Somewhat									No		Less than one hour per day	Female	61 or older
1		Selected		1		Yes									Book, magazine or other printed source written by a veterinarian other than your own	Consult with a nutritionist or veterinarian	Used a published reference source						Very much	Somewhat	Beneficial	Beneficial	Beneficial	Beneficial	Agree Somewhat	Agree Strongly	Agree Somewhat	Agree Strongly	Agree Somewhat	Agree Somewhat	Agree Strongly	Agree Strongly						Consulted Small Animal Clinical Nutrition, or similar texts for professionals		Consulted Professional websites	No		More than 2 hours per day	Female	18-30
1			Selected		1	No																	Very much	Very much	Beneficial	Beneficial	Beneficial	Beneficial	Agree Strongly	Agree Somewhat	Agree Somewhat	Agree Somewhat	Disagree Somewhat	Disagree Somewhat	Don't Know	Agree Somewhat							Familiar With Professional websites		No		More than 2 hours per day	Female	31-40
1		Selected	Selected	2	1	Yes		Internet	Friend/family member														Somewhat	Somewhat	Beneficial	Beneficial	Beneficial	Beneficial	Agree Strongly	Agree Strongly	Agree Strongly	Agree Strongly	Disagree Somewhat	Disagree Somewhat	Agree Strongly	Agree Strongly									Yes (Please specify)	yourdiabeticcat.com	Less than one hour per day	Female	41-50
1			Selected		2	Yes		Internet	Friend/family member		Book								Friend/family member				Somewhat	A little	Harmful	Unnecessary	Unnecessary	Beneficial	Agree Strongly	Agree Strongly	Agree Strongly	Agree Somewhat	Agree Somewhat	Disagree Strongly	Agree Strongly	Agree Strongly			Familiar With National Research Council: Nutrient Requirements for Dogs and Cats				Familiar With Professional websites		Yes (Please specify)	Books, raw feed grouls	More than 2 hours per day	Female	51-60
1		Selected		1		Yes		Internet										Used information from an online resource	Friend/family member			Decided proportions and composition based on availability	Somewhat	A little	Beneficial	Beneficial	Beneficial	Unnecessary	Agree Somewhat	Agree Somewhat	Agree Strongly	Agree Somewhat	Agree Somewhat	Agree Strongly	Agree Strongly	Agree Strongly							Familiar With Professional websites		No		More than 2 hours per day	Female	18-30
1		Selected	Selected	4	2	Yes		Internet														Decided proportions and composition based on availability	Very much	Somewhat	Beneficial	Beneficial	Beneficial	Beneficial	Disagree Somewhat	Agree Strongly	Agree Somewhat	Agree Strongly	Disagree Somewhat	Disagree Strongly	Agree Somewhat	Agree Strongly		Consulted Association of American Feed Control Officials Publications		Consulted National Research Council: Nutrient Requirements for Dogs and Cats		Consulted Small Animal Clinical Nutrition, or similar texts for professionals	Familiar With Professional websites				More than 2 hours per day	Female	18-30
1		Selected		2		Yes		Internet	Friend/family member			Pet store employee	My veterinarian		Book, magazine or other printed source written by a veterinarian other than your own								Very much	Not very much	Beneficial	Unnecessary	Unnecessary	Beneficial	Agree Somewhat	Agree Somewhat	Agree Strongly	Agree Strongly	Disagree Somewhat	Agree Strongly	Agree Strongly	Agree Strongly							Familiar With Professional websites		Yes (Please specify)	catinfo.org, raw feeding support groups	More than 2 hours per day	Female	18-30
1		Selected		1		Yes		Internet	Friend/family member			Pet store employee					Used a published reference source	Used information from an online resource	Friend/family member		Pet store personnel		Very much	Somewhat	Beneficial	Beneficial	Beneficial	Beneficial	Agree Somewhat	Agree Somewhat	Agree Strongly	Agree Somewhat	Disagree Strongly	Agree Strongly	Agree Strongly	Agree Strongly			Familiar With National Research Council: Nutrient Requirements for Dogs and Cats				Familiar With Professional websites		No		More than 2 hours per day	Female	18-30
1			Selected		1	Yes	Breeder instructions or advice	Internet			Book			Email group	Book, magazine or other printed source written by a veterinarian other than your own								Very much	Not very much	Beneficial	Unnecessary	Beneficial	Beneficial	Agree Somewhat	Agree Somewhat	Agree Somewhat	Agree Somewhat	Disagree Strongly	Agree Somewhat	Don't Know	Don't Know			Familiar With National Research Council: Nutrient Requirements for Dogs and Cats					Consulted Professional websites	Yes (Please specify)	Whole dog journal	1-2 hours per day	Female	61 or older
1		Selected	Selected	1	1	Yes		Internet															Very much	A little	Beneficial	Unnecessary	Beneficial	Beneficial	Agree Somewhat	Agree Somewhat	Agree Strongly	Agree Strongly	Agree Somewhat	Agree Strongly	Agree Strongly	Don't Know							Familiar With Professional websites		No		More than 2 hours per day	Female	31-40
1			Selected		3	Yes							My veterinarian										Very much	Very much	Beneficial	Beneficial	Beneficial	Beneficial	Agree Somewhat	Agree Strongly	Agree Strongly	Agree Strongly	Agree Somewhat	Disagree Strongly	Agree Strongly	Agree Strongly	Familiar With Association of American Feed Control Officials Publications	Consulted Association of American Feed Control Officials Publications	Familiar With National Research Council: Nutrient Requirements for Dogs and Cats		Familiar With Small Animal Clinical Nutrition, or similar texts for professionals	Consulted Small Animal Clinical Nutrition, or similar texts for professionals	Familiar With Professional websites		No		More than 2 hours per day	Male	18-30
1			Selected		1	Yes		Internet										Used information from an online resource	Friend/family member				Very much	Somewhat	Beneficial	Beneficial	Beneficial	Beneficial	Agree Somewhat	Agree Somewhat	Agree Strongly	Agree Strongly	Disagree Somewhat	Agree Strongly	Agree Strongly	Agree Strongly									No		More than 2 hours per day	Female	18-30
1			Selected		1	Yes		Internet															Very much	Somewhat	Beneficial	Beneficial	Beneficial	Beneficial	Disagree Somewhat	Agree Somewhat	Agree Somewhat	Agree Strongly	Disagree Somewhat	Disagree Somewhat		Agree Somewhat									No		More than 2 hours per day	Female	31-40
1		Selected	Selected	3	3	Yes		Internet															Very much	Somewhat	Beneficial	Beneficial	Beneficial	Beneficial	Agree Somewhat	Disagree Somewhat	Agree Somewhat	Agree Strongly	Agree Somewhat	Agree Somewhat	Don't Know	Agree Strongly	Familiar With Association of American Feed Control Officials Publications		Familiar With National Research Council: Nutrient Requirements for Dogs and Cats			Consulted Small Animal Clinical Nutrition, or similar texts for professionals		Consulted Professional websites	No		More than 2 hours per day	Female	41-50
1			Selected		2	Yes		Internet	Friend/family member		Book			Email group	Book, magazine or other printed source written by a veterinarian other than your own		Used a published reference source	Used information from an online resource	Friend/family member			Decided proportions and composition based on availability	A little	Not very much	Harmful	Unnecessary	Unnecessary	Unnecessary	Agree Somewhat	Agree Somewhat	Agree Strongly	Agree Strongly	Agree Strongly	Agree Strongly	Agree Strongly	Agree Strongly	Familiar With Association of American Feed Control Officials Publications		Familiar With National Research Council: Nutrient Requirements for Dogs and Cats		Familiar With Small Animal Clinical Nutrition, or similar texts for professionals		Familiar With Professional websites				More than 2 hours per day	Female	51-60
1		Selected	Selected	1	5	Yes			Friend/family member							Consult with a nutritionist or veterinarian	Used a published reference source	Used information from an online resource		Breeder		Decided proportions and composition based on availability	Not very much	Not very much	Harmful	Harmful	Harmful	Beneficial	Disagree Strongly	Disagree Strongly	Disagree Strongly	Disagree Strongly	Disagree Strongly	Disagree Strongly	Disagree Strongly	Disagree Strongly			Familiar With National Research Council: Nutrient Requirements for Dogs and Cats		Familiar With Small Animal Clinical Nutrition, or similar texts for professionals		Familiar With Professional websites		No		More than 2 hours per day	Female	41-50
1			Selected		6	Yes							My veterinarian				Used a published reference source						Somewhat	Somewhat	Harmful	Harmful	Beneficial	Beneficial	Agree Strongly	Agree Strongly	Agree Strongly	Agree Strongly	Agree Somewhat	Agree Strongly	Agree Strongly	Agree Strongly			Familiar With National Research Council: Nutrient Requirements for Dogs and Cats		Familiar With Small Animal Clinical Nutrition, or similar texts for professionals				Yes (Please specify)	Too many to write down. One I do enjoy is "The Truth About Pet Food" by Susan Thixton. I have a library here full of nutritional books for humans and dogs	More than 2 hours per day	Female	51-60
1		Selected	Selected	2	2	Yes																	Very much	Very much	Beneficial	Beneficial	Beneficial	Beneficial	Disagree Somewhat	Agree Strongly	Agree Strongly	Agree Strongly	Disagree Strongly	Disagree Strongly	Agree Strongly	Agree Strongly	Familiar With Association of American Feed Control Officials Publications		Familiar With National Research Council: Nutrient Requirements for Dogs and Cats		Familiar With Small Animal Clinical Nutrition, or similar texts for professionals		Familiar With Professional websites		Yes (Please specify)	I am a veterinarian		Female	31-40
1			Selected		3	Yes		Internet	Friend/family member		Book							Used information from an online resource					Very much	Not very much	Unnecessary	Beneficial	Beneficial	Beneficial	Agree Somewhat	Agree Somewhat	Agree Strongly	Agree Somewhat	Don't Know	Agree Strongly	Agree Strongly	Agree Strongly			Familiar With National Research Council: Nutrient Requirements for Dogs and Cats				Familiar With Professional websites		No		More than 2 hours per day	Female	18-30
1			Selected		3	Yes		Internet								Consult with a nutritionist or veterinarian							Very much	Somewhat	Beneficial	Beneficial	Beneficial	Beneficial	Agree Somewhat	Agree Somewhat	Agree Strongly	Agree Strongly	Disagree Somewhat	Agree Strongly	Agree Strongly	Agree Strongly		Consulted Association of American Feed Control Officials Publications		Consulted National Research Council: Nutrient Requirements for Dogs and Cats		Consulted Small Animal Clinical Nutrition, or similar texts for professionals		Consulted Professional websites	Yes (Please specify)	some books and magazines	1-2 hours per day	Female	31-40
1			Selected		3	Yes		Internet															Very much	Very much	Beneficial	Beneficial	Beneficial	Beneficial	Agree Somewhat	Agree Strongly	Agree Strongly	Agree Strongly	Disagree Somewhat	Agree Somewhat	Agree Strongly	Agree Strongly									No		Less than one hour per day	Male	51-60
1		Selected		2		Yes		Internet										Used information from an online resource					Somewhat	Not very much	Unnecessary	Beneficial	Unnecessary	Unnecessary	Agree Somewhat	Agree Somewhat	Agree Strongly	Agree Somewhat	Agree Somewhat		Agree Strongly	Agree Strongly	Familiar With Association of American Feed Control Officials Publications								Yes (Please specify)	CatCentric, Little Big Cat	1-2 hours per day	Female	51-60
1			Selected		1	Yes			Friend/family member			Pet store employee					Used a published reference source	Used information from an online resource			Pet store personnel		Very much	Somewhat	Beneficial	Beneficial	Beneficial	Beneficial	Agree Strongly	Agree Strongly	Agree Strongly	Agree Strongly	Disagree Somewhat	Disagree Somewhat	Agree Strongly	Don't Know						Consulted Small Animal Clinical Nutrition, or similar texts for professionals			Yes (Please specify)	Nutrient Requirements of Dogs and Cats (2005) National Research Council	More than 2 hours per day	Female	31-40
1			Selected		1	Yes		Internet									Used a published reference source	Used information from an online resource					Somewhat	Not very much	Unnecessary	Unnecessary	Beneficial	Beneficial	Agree Strongly	Agree Somewhat	Agree Strongly	Agree Strongly	Disagree Strongly	Agree Strongly	Agree Strongly	Agree Strongly											1-2 hours per day	Female	18-30
1			Selected		1	Yes			Friend/family member				My veterinarian			Consult with a nutritionist or veterinarian			Friend/family member				Somewhat	Somewhat	Beneficial	Beneficial	Beneficial	Beneficial	Agree Somewhat	Agree Somewhat	Agree Somewhat	Agree Somewhat	Agree Somewhat	Agree Somewhat	Agree Strongly	Agree Strongly									No		1-2 hours per day	Female	41-50
1			Selected		4	Yes							My veterinarian			Consult with a nutritionist or veterinarian							Very much	Very much	Beneficial	Beneficial	Beneficial	Beneficial	Agree Strongly	Agree Strongly	Agree Strongly	Agree Strongly	Agree Somewhat	Agree Somewhat	Agree Strongly	Agree Strongly		Consulted Association of American Feed Control Officials Publications		Consulted National Research Council: Nutrient Requirements for Dogs and Cats		Consulted Small Animal Clinical Nutrition, or similar texts for professionals	Familiar With Professional websites		Yes (Please specify)	Cachorro verde	More than 2 hours per day	Female	31-40
1			Selected		2	Yes		Internet	Friend/family member					Email group	Book, magazine or other printed source written by a veterinarian other than your own		Used a published reference source		Friend/family member				Somewhat	Somewhat	Beneficial	Beneficial	Beneficial	Unnecessary	Agree Somewhat	Agree Strongly	Agree Strongly		Don't Know	Agree Somewhat	Agree Strongly	Agree Strongly											1-2 hours per day	Female	51-60
1		Selected	Selected	1	2	Yes		Internet	Friend/family member		Book				Book, magazine or other printed source written by a veterinarian other than your own			Used information from an online resource				Decided proportions and composition based on availability	Somewhat	Somewhat	Beneficial		Beneficial	Beneficial	Agree Strongly	Agree Somewhat	Agree Strongly	Agree Somewhat	Agree Somewhat	Don't Know	Agree Strongly	Agree Strongly									Yes (Please specify)	I dont remeber	More than 2 hours per day	Female	18-30
1			Selected		1	Yes		Internet										Used information from an online resource					Somewhat	Not very much	Unnecessary	Unnecessary	Unnecessary	Unnecessary	Agree Strongly	Agree Strongly	Agree Strongly	Agree Strongly	Disagree Somewhat	Agree Strongly	Agree Strongly	Agree Strongly									Yes (Please specify)	Raw feeding group on facebook	1-2 hours per day	Male	51-60
1		Selected		3		Yes		Internet		Magazine				Email group				Used information from an online resource				Decided proportions and composition based on availability	Somewhat	Somewhat	Unnecessary	Unnecessary	Unnecessary	Beneficial	Disagree Somewhat	Agree Somewhat	Agree Strongly	Agree Strongly	Disagree Somewhat	Agree Strongly	Agree Strongly	Agree Strongly		Consulted Association of American Feed Control Officials Publications		Consulted National Research Council: Nutrient Requirements for Dogs and Cats		Consulted Small Animal Clinical Nutrition, or similar texts for professionals	Familiar With Professional websites		Yes (Please specify)	Dr. Jean Hofve. Dr. Elizabeth Hodgkins, Dr.Lisa PIerson. Dr. Karen Becker, AHVMA	More than 2 hours per day	Female	61 or older
1		Selected	Selected	1	2	Yes							My veterinarian			Consult with a nutritionist or veterinarian	Used a published reference source						Somewhat	Not very much	Unnecessary	Unnecessary	Unnecessary	Beneficial	Agree Strongly	Agree Strongly	Agree Strongly	Agree Strongly	Agree Strongly	Agree Strongly	Agree Strongly	Agree Strongly		Consulted Association of American Feed Control Officials Publications		Consulted National Research Council: Nutrient Requirements for Dogs and Cats		Consulted Small Animal Clinical Nutrition, or similar texts for professionals		Consulted Professional websites	Yes (Please specify)	catnutrition.org, conrucopia institute, catinfo.org, dog food logic, truth about pet food	1-2 hours per day	Female	41-50
1			Selected		3	Yes			Friend/family member													Decided proportions and composition based on availability	Very much	Somewhat	Unnecessary	Unnecessary	Unnecessary	Beneficial	Agree Strongly	Agree Strongly	Agree Strongly	Agree Strongly	Agree Somewhat	Agree Somewhat	Agree Strongly	Agree Somewhat											1-2 hours per day	Female	61 or older
1		Selected	Selected	4	4	Yes	Breeder instructions or advice		Friend/family member										Friend/family member	Breeder			Somewhat	A little	Harmful	Harmful	Beneficial	Beneficial	Agree Strongly	Agree Strongly	Agree Strongly	Agree Strongly	Agree Strongly	Agree Strongly	Agree Strongly	Agree Strongly									No		1-2 hours per day	Female	51-60
1			Selected		1	Yes						Pet store employee	My veterinarian		Book, magazine or other printed source written by a veterinarian other than your own								Very much	Somewhat	Beneficial	Beneficial		Beneficial	Disagree Strongly	Agree Somewhat	Agree Somewhat	Agree Somewhat	Disagree Somewhat	Disagree Somewhat	Agree Strongly	Agree Somewhat	Familiar With Association of American Feed Control Officials Publications						Familiar With Professional websites		No		Less than one hour per day	Male	61 or older
1			Selected		5	Yes	Breeder instructions or advice						My veterinarian			Consult with a nutritionist or veterinarian	Used a published reference source						Somewhat	A little	Beneficial	Beneficial	Beneficial	Beneficial	Agree Somewhat	Agree Somewhat	Agree Strongly	Agree Strongly	Agree Somewhat	Agree Somewhat	Agree Strongly	Agree Strongly			Familiar With National Research Council: Nutrient Requirements for Dogs and Cats		Familiar With Small Animal Clinical Nutrition, or similar texts for professionals				Yes (Please specify)		More than 2 hours per day	Female	51-60
1		Selected	Selected	1	1	Yes			Friend/family member										Friend/family member			Decided proportions and composition based on availability	Somewhat	Not very much	Harmful	Harmful	Unnecessary	Unnecessary	Agree Strongly	Agree Strongly	Agree Strongly	Agree Strongly	Agree Strongly	Agree Strongly	Agree Strongly	Don't Know									No		More than 2 hours per day	Female	41-50
1			Selected		2	Yes			Friend/family member							Consult with a nutritionist or veterinarian							Somewhat	Not very much	Harmful	Harmful	Unnecessary	Beneficial	Agree Somewhat	Agree Somewhat	Agree Strongly	Agree Somewhat	Don't Know	Agree Strongly	Agree Somewhat	Agree Somewhat									Yes (Please specify)	A friend who speaks at holistic vet conferences on nutrition	Less than one hour per day	Female	41-50
1		Selected	Selected	6	5	Yes	Breeder instructions or advice						My veterinarian					Used information from an online resource					Somewhat	Somewhat	Unnecessary	Beneficial	Beneficial	Beneficial	Disagree Strongly	Disagree Strongly	Disagree Strongly	Disagree Strongly	Disagree Strongly	Disagree Strongly	Disagree Strongly	Disagree Somewhat	Familiar With Association of American Feed Control Officials Publications		Familiar With National Research Council: Nutrient Requirements for Dogs and Cats		Familiar With Small Animal Clinical Nutrition, or similar texts for professionals		Familiar With Professional websites		No		Less than one hour per day	Female	18-30
1			Selected		6	Yes		Internet	Friend/family member									Used information from an online resource	Friend/family member				Somewhat	Somewhat	Beneficial	Beneficial	Beneficial	Beneficial	Agree Strongly	Agree Strongly	Agree Strongly	Agree Strongly	Agree Strongly	Agree Strongly	Agree Strongly	Agree Strongly	Familiar With Association of American Feed Control Officials Publications		Familiar With National Research Council: Nutrient Requirements for Dogs and Cats		Familiar With Small Animal Clinical Nutrition, or similar texts for professionals		Familiar With Professional websites		No		More than 2 hours per day	Male	41-50
1		Selected		1		Yes			Friend/family member														Very much	Very much	Beneficial	Beneficial	Beneficial	Beneficial	Disagree Somewhat	Disagree Somewhat	Agree Somewhat	Agree Somewhat	Agree Somewhat	Agree Somewhat	Agree Somewhat	Agree Somewhat									No		More than 2 hours per day	Female	18-30
1			Selected		1	Yes		Internet							Book, magazine or other printed source written by a veterinarian other than your own	Consult with a nutritionist or veterinarian	Used a published reference source					Decided proportions and composition based on availability	Very much	Very much	Beneficial	Beneficial	Beneficial	Beneficial	Agree Strongly	Agree Somewhat	Agree Somewhat	Agree Somewhat	Agree Strongly	Agree Strongly	Agree Strongly	Agree Strongly	Familiar With Association of American Feed Control Officials Publications		Familiar With National Research Council: Nutrient Requirements for Dogs and Cats		Familiar With Small Animal Clinical Nutrition, or similar texts for professionals		Familiar With Professional websites		Yes (Please specify)	www.cachorroverde.com.br	1-2 hours per day	Female	31-40
1			Selected		2	Yes		Internet									Used a published reference source	Used information from an online resource					Somewhat	Not very much	Harmful	Harmful	Harmful	Unnecessary	Agree Strongly	Agree Strongly	Agree Strongly	Agree Strongly	Don't Know	Agree Strongly	Agree Strongly	Agree Strongly									Yes (Please specify)	Rodney habin, j.mercola, etc	1-2 hours per day	Female	61 or older
1		Selected	Selected	1	1	Yes		Internet	Friend/family member									Used information from an online resource	Friend/family member				Somewhat	A little	Beneficial	Beneficial	Beneficial	Beneficial	Agree Somewhat	Agree Somewhat	Agree Strongly	Agree Somewhat	Don't Know	Agree Strongly	Agree Somewhat	Agree Somewhat									No		More than 2 hours per day	Female	18-30
1		Selected	Selected	1	2	Yes		Internet									Used a published reference source	Used information from an online resource					Somewhat	A little	Harmful	Harmful	Harmful	Beneficial	Agree Strongly	Agree Strongly	Agree Strongly	Agree Strongly	Agree Somewhat	Agree Strongly	Agree Strongly	Agree Strongly	Familiar With Association of American Feed Control Officials Publications		Familiar With National Research Council: Nutrient Requirements for Dogs and Cats			Consulted Small Animal Clinical Nutrition, or similar texts for professionals	Familiar With Professional websites		Yes (Please specify)	Cachorro Verde (Brazil)	More than 2 hours per day	Female	31-40
1			Selected		9	Yes	Breeder instructions or advice		Friend/family member										Friend/family member	Breeder			Very much	Somewhat	Beneficial	Beneficial	Beneficial	Beneficial	Agree Somewhat	Agree Somewhat	Agree Strongly	Agree Strongly	Agree Somewhat	Agree Somewhat	Agree Strongly	Agree Somewhat									No		More than 2 hours per day	Male	61 or older
1		Selected		2		Yes		Internet								Consult with a nutritionist or veterinarian	Used a published reference source	Used information from an online resource			Pet store personnel	Decided proportions and composition based on availability	Somewhat	A little	Beneficial	Beneficial	Beneficial	Unnecessary	Agree Strongly	Agree Strongly	Agree Strongly	Agree Strongly	Agree Somewhat	Agree Strongly	Agree Strongly	Agree Strongly	Familiar With Association of American Feed Control Officials Publications				Familiar With Small Animal Clinical Nutrition, or similar texts for professionals		Familiar With Professional websites		Yes (Please specify)	Dr. Pierson's site, Dr. Hofve's site, Cornell Vet School site, numerous others.	More than 2 hours per day	Female	51-60
1			Selected		3	Yes			Friend/family member				My veterinarian			Consult with a nutritionist or veterinarian							Very much	Somewhat	Beneficial	Harmful	Beneficial	Beneficial	Agree Strongly	Agree Somewhat	Agree Somewhat	Agree Somewhat	Agree Somewhat	Agree Somewhat	Agree Strongly	Agree Somewhat									Yes (Please specify)	my vet who specializes in nutrition	1-2 hours per day	Female	51-60
1		Selected		1		Yes							My veterinarian			Consult with a nutritionist or veterinarian	Used a published reference source						Very much	Somewhat	Unnecessary	Beneficial	Beneficial	Beneficial	Agree Strongly	Agree Strongly	Agree Strongly	Agree Strongly	Disagree Strongly	Agree Somewhat	Agree Strongly	Agree Strongly	Familiar With Association of American Feed Control Officials Publications					Consulted Small Animal Clinical Nutrition, or similar texts for professionals	Familiar With Professional websites		Yes (Please specify)	littlebigcat.com, catinfo.org	Less than one hour per day	Female	41-50
1		Selected	Selected	2	3	Yes			Friend/family member														Very much	Very much	Beneficial	Beneficial	Beneficial	Unnecessary	Agree Somewhat	Agree Somewhat	Agree Strongly	Agree Strongly	Disagree Somewhat	Disagree Somewhat	Agree Strongly	Agree Strongly	Familiar With Association of American Feed Control Officials Publications		Familiar With National Research Council: Nutrient Requirements for Dogs and Cats	Consulted National Research Council: Nutrient Requirements for Dogs and Cats	Familiar With Small Animal Clinical Nutrition, or similar texts for professionals		Familiar With Professional websites		No		1-2 hours per day	Female	31-40
1		Selected		2		Yes		Internet									Used a published reference source	Used information from an online resource					Somewhat	Somewhat	Unnecessary	Beneficial	Beneficial	Unnecessary	Agree Strongly	Agree Strongly	Agree Strongly	Agree Strongly	Agree Strongly	Agree Strongly	Agree Strongly	Agree Somewhat											More than 2 hours per day	Female	31-40
1		Selected	Selected	3	3	Yes	Breeder instructions or advice																Very much	Very much	Beneficial	Beneficial	Beneficial	Beneficial	Disagree Somewhat	Agree Somewhat	Agree Strongly	Agree Strongly	Disagree Somewhat	Disagree Somewhat	Agree Strongly	Agree Strongly	Familiar With Association of American Feed Control Officials Publications				Familiar With Small Animal Clinical Nutrition, or similar texts for professionals				Yes (Please specify)	Our board certified veterinary nutritionists	1-2 hours per day	Female	51-60
1			Selected		2	Yes		Internet	Friend/family member								Used a published reference source		Friend/family member				Somewhat	Somewhat	Unnecessary	Beneficial	Beneficial	Beneficial	Agree Strongly	Agree Strongly	Agree Strongly	Agree Strongly	Disagree Somewhat	Agree Strongly	Agree Strongly	Agree Strongly									Yes (Please specify)	www.cachorroverde.com.br (a website about natural food for pets, created by a veterinarian who researched and studied deeply the subject)	More than 2 hours per day	Female	51-60
1		Selected	Selected	1	3	Yes		Internet										Used information from an online resource					Somewhat	Not very much	Harmful	Unnecessary	Beneficial	Unnecessary	Agree Strongly	Agree Strongly	Agree Strongly	Agree Strongly	Disagree Strongly	Agree Strongly	Agree Strongly	Agree Strongly	Familiar With Association of American Feed Control Officials Publications		Familiar With National Research Council: Nutrient Requirements for Dogs and Cats						No		1-2 hours per day	Female	51-60
1		Selected		1		Yes		Internet	Friend/family member	Magazine		Pet store employee	My veterinarian										Very much	Very much	Beneficial	Beneficial	Beneficial	Beneficial	Disagree Somewhat	Agree Somewhat	Agree Strongly	Agree Strongly	Disagree Strongly	Disagree Strongly	Agree Strongly	Agree Somewhat							Familiar With Professional websites		No		More than 2 hours per day	Female	31-40
1			Selected		7	Yes		Internet										Used information from an online resource					Somewhat	A little	Harmful	Unnecessary	Beneficial	Beneficial	Agree Somewhat	Agree Somewhat	Agree Strongly	Agree Somewhat	Agree Somewhat	Agree Somewhat	Agree Strongly	Don't Know											1-2 hours per day	Female	51-60
1			Selected		6	Yes	Breeder instructions or advice	Internet	Friend/family member						Book, magazine or other printed source written by a veterinarian other than your own	Consult with a nutritionist or veterinarian	Used a published reference source	Used information from an online resource					Somewhat	Not very much	Harmful	Beneficial	Beneficial	Beneficial	Agree Strongly	Agree Strongly	Agree Strongly	Agree Strongly	Agree Strongly	Agree Strongly	Agree Strongly	Agree Strongly	Familiar With Association of American Feed Control Officials Publications		Familiar With National Research Council: Nutrient Requirements for Dogs and Cats				Familiar With Professional websites				Less than one hour per day	Female	51-60
1			Selected		4	Yes		Internet															Very much	Very much	Beneficial	Beneficial	Beneficial	Beneficial	Disagree Somewhat	Disagree Somewhat	Agree Somewhat	Agree Somewhat	Disagree Somewhat	Disagree Strongly	Agree Somewhat	Agree Strongly							Familiar With Professional websites				1-2 hours per day	Female	18-30
1			Selected		2	Yes		Internet	Friend/family member		Book				Book, magazine or other printed source written by a veterinarian other than your own		Used a published reference source	Used information from an online resource					Very much	Somewhat	Beneficial	Beneficial	Beneficial	Beneficial	Agree Strongly	Agree Somewhat	Agree Strongly	Agree Strongly	Agree Strongly	Agree Strongly	Agree Strongly	Agree Strongly									Yes (Please specify)	Cachorro verde	More than 2 hours per day	Female	41-50
1		Selected		4		Yes							My veterinarian										Very much	Very much	Beneficial	Beneficial	Beneficial	Beneficial	Agree Strongly	Agree Strongly	Agree Strongly	Agree Strongly	Agree Somewhat	Agree Somewhat	Agree Strongly	Don't Know									No		More than 2 hours per day	Female	61 or older
1		Selected		7		Yes		Internet						Email group				Used information from an online resource	Friend/family member				Somewhat	Not very much	Unnecessary	Harmful	Unnecessary	Beneficial	Agree Somewhat	Agree Somewhat	Agree Strongly	Agree Strongly	Agree Somewhat	Agree Strongly	Agree Strongly	Agree Strongly	Familiar With Association of American Feed Control Officials Publications	Consulted Association of American Feed Control Officials Publications							Yes (Please specify)	Lisa Piersons online resources, also www.felinenutrition.org and www.diabeticcatcare.com	More than 2 hours per day	Female	41-50
1		Selected	Selected	1	1	Yes		Internet	Friend/family member				My veterinarian		Book, magazine or other printed source written by a veterinarian other than your own								Very much	Very much	Beneficial	Beneficial	Beneficial	Beneficial	Disagree Strongly	Agree Somewhat	Agree Strongly	Agree Strongly	Agree Somewhat	Disagree Somewhat	Agree Strongly	Agree Somewhat	Familiar With Association of American Feed Control Officials Publications		Familiar With National Research Council: Nutrient Requirements for Dogs and Cats		Familiar With Small Animal Clinical Nutrition, or similar texts for professionals		Familiar With Professional websites		No		Less than one hour per day	Male	31-40
1			Selected		2	Yes	Breeder instructions or advice	Internet	Friend/family member					Email group			Used a published reference source	Used information from an online resource					Somewhat	Somewhat	Beneficial	Beneficial	Beneficial	Beneficial	Agree Somewhat	Agree Somewhat	Agree Strongly	Agree Strongly	Agree Somewhat	Agree Strongly	Agree Strongly	Agree Strongly									Yes (Please specify)	Raw and holistic	1-2 hours per day	Female	51-60
1			Selected		1	Yes							My veterinarian									Decided proportions and composition based on availability	Very much	Very much	Beneficial	Unnecessary	Unnecessary	Beneficial	Agree Strongly	Agree Strongly	Agree Strongly	Agree Strongly	Agree Somewhat	Agree Somewhat	Agree Strongly	Agree Strongly									No		Less than one hour per day	Female	61 or older
1			Selected		3	Yes	Breeder instructions or advice	Internet										Used information from an online resource	Friend/family member	Breeder			Somewhat	A little	Harmful	Harmful	Harmful	Beneficial	Agree Strongly		Agree Strongly	Agree Strongly	Agree Strongly			Agree Strongly									No		More than 2 hours per day	Female	51-60
1			Selected		1	Yes																	Somewhat	Not very much	Harmful	Harmful	Beneficial	Beneficial	Agree Strongly	Agree Strongly	Agree Strongly	Agree Strongly	Agree Strongly	Agree Strongly	Agree Strongly	Agree Somewhat	Familiar With Association of American Feed Control Officials Publications		Familiar With National Research Council: Nutrient Requirements for Dogs and Cats		Familiar With Small Animal Clinical Nutrition, or similar texts for professionals				Yes (Please specify)	I am a holistic veterinarian, and rely on seminars/talking to holistic colleagues/etc for whole food nutrition education	More than 2 hours per day	Female	51-60
1			Selected		1	Yes		Internet									Used a published reference source	Used information from an online resource					Somewhat	A little	Beneficial	Beneficial	Beneficial	Beneficial	Agree Somewhat	Agree Somewhat	Agree Strongly	Agree Strongly	Agree Somewhat	Agree Somewhat	Agree Strongly	Agree Strongly	Familiar With Association of American Feed Control Officials Publications		Familiar With National Research Council: Nutrient Requirements for Dogs and Cats		Familiar With Small Animal Clinical Nutrition, or similar texts for professionals			Consulted Professional websites	No		More than 2 hours per day	Female	18-30
1			Selected		2	Yes	Breeder instructions or advice														Pet store personnel		Somewhat	Somewhat	Beneficial	Unnecessary	Unnecessary	Beneficial	Agree Strongly	Agree Strongly	Agree Strongly	Agree Strongly	Agree Strongly	Agree Strongly	Agree Strongly	Agree Strongly							Familiar With Professional websites		No		More than 2 hours per day	Female	61 or older
1			Selected		3	Yes		Internet	Friend/family member														Very much	Somewhat	Beneficial	Unnecessary	Unnecessary	Beneficial	Agree Strongly	Agree Somewhat	Agree Strongly	Agree Somewhat	Disagree Strongly	Agree Strongly	Agree Strongly	Agree Strongly									Yes (Please specify)	Brazilian's articles	1-2 hours per day	Female	18-30
1		Selected		1		Yes		Internet				Pet store employee			Book, magazine or other printed source written by a veterinarian other than your own								Very much	Very much	Beneficial	Beneficial	Beneficial	Beneficial	Agree Somewhat	Agree Strongly	Agree Strongly	Agree Strongly	Disagree Strongly	Disagree Strongly	Agree Strongly	Agree Somewhat		Consulted Association of American Feed Control Officials Publications				Consulted Small Animal Clinical Nutrition, or similar texts for professionals		Consulted Professional websites			1-2 hours per day	Female	31-40
1		Selected		1		Yes		Internet	Friend/family member														Somewhat	Not very much	Unnecessary	Beneficial	Beneficial	Beneficial	Agree Strongly	Agree Strongly	Agree Somewhat	Agree Somewhat	Agree Strongly	Agree Strongly	Agree Strongly	Agree Strongly											More than 2 hours per day	Female	31-40
1			Selected		1	Yes			Friend/family member														Very much	Somewhat	Beneficial	Beneficial	Beneficial	Beneficial	Agree Strongly	Agree Strongly	Agree Strongly	Agree Strongly	Agree Somewhat	Agree Somewhat	Agree Strongly	Agree Strongly							Familiar With Professional websites		No		1-2 hours per day	Female	18-30
1		Selected	Selected	5	4	No																	Somewhat	Not very much	Unnecessary	Beneficial	Beneficial	Unnecessary	Agree Somewhat	Agree Somewhat	Agree Strongly	Agree Somewhat	Don't Know	Agree Strongly	Agree Strongly	Agree Strongly									No		More than 2 hours per day	Female	31-40
1		Selected		4		Yes		Internet										Used information from an online resource					Very much	Somewhat	Beneficial	Beneficial	Beneficial	Beneficial	Agree Somewhat	Agree Somewhat	Agree Somewhat	Agree Somewhat	Agree Somewhat	Agree Somewhat	Agree Strongly	Agree Strongly											More than 2 hours per day	Female	51-60
1			Selected		1	No																	Very much	Very much	Beneficial	Beneficial	Beneficial	Beneficial	Disagree Strongly	Agree Somewhat	Agree Somewhat	Agree Somewhat	Agree Somewhat	Agree Somewhat	Agree Somewhat	Agree Somewhat									No		1-2 hours per day	Female	51-60
1		Selected	Selected	1	2	Yes			Friend/family member														Somewhat	A little	Beneficial	Unnecessary	Beneficial	Beneficial	Agree Strongly	Agree Strongly	Disagree Somewhat	Agree Somewhat	Agree Somewhat	Don't Know	Agree Strongly	Agree Strongly									Yes (Please specify)	Whole dog journal & pet food advisor	More than 2 hours per day	Female	31-40
1			Selected		1	Yes			Friend/family member							Consult with a nutritionist or veterinarian	Used a published reference source	Used information from an online resource	Friend/family member		Pet store personnel		Somewhat	Not very much	Unnecessary	Unnecessary	Unnecessary	Unnecessary	Agree Somewhat	Agree Somewhat	Agree Strongly	Agree Strongly	Don't Know	Don't Know	Agree Strongly	Agree Strongly									No		More than 2 hours per day	Female	18-30
1			Selected		2	No																	Very much	Very much	Beneficial	Beneficial	Beneficial	Beneficial	Agree Somewhat	Agree Somewhat	Agree Somewhat	Agree Somewhat	Agree Somewhat	Agree Strongly	Agree Strongly	Agree Strongly											More than 2 hours per day	Female	18-30
1			Selected		2	Yes	Breeder instructions or advice		Friend/family member		Book						Used a published reference source	Used information from an online resource		Breeder			Somewhat	Not very much	Unnecessary	Beneficial	Beneficial	Beneficial	Agree Strongly	Agree Strongly	Agree Strongly	Agree Strongly	Agree Somewhat	Agree Strongly	Agree Strongly	Agree Somewhat			Familiar With National Research Council: Nutrient Requirements for Dogs and Cats		Familiar With Small Animal Clinical Nutrition, or similar texts for professionals				Yes (Please specify)	Dr. Jean Dodds, DVM	More than 2 hours per day	Female	51-60
1		Selected		1		Yes	Breeder instructions or advice	Internet				Pet store employee											Somewhat	A little	Beneficial	Beneficial	Beneficial	Beneficial	Agree Strongly	Agree Somewhat	Agree Strongly		Disagree Somewhat	Agree Strongly	Agree Strongly	Agree Strongly	Familiar With Association of American Feed Control Officials Publications		Familiar With National Research Council: Nutrient Requirements for Dogs and Cats		Familiar With Small Animal Clinical Nutrition, or similar texts for professionals		Familiar With Professional websites	Consulted Professional websites	No		1-2 hours per day	Female	31-40
1			Selected		1	Yes			Friend/family member														Somewhat	Not very much	Beneficial	Beneficial	Beneficial	Beneficial	Agree Somewhat	Agree Somewhat	Agree Strongly	Agree Strongly	Agree Somewhat	Agree Somewhat	Agree Strongly	Agree Somewhat									No		More than 2 hours per day	Female	51-60
1		Selected	Selected	5	1	Yes		Internet										Used information from an online resource					Somewhat	A little	Beneficial	Beneficial	Beneficial	Unnecessary	Agree Strongly	Agree Strongly	Agree Somewhat	Agree Somewhat	Disagree Somewhat	Agree Strongly	Agree Strongly	Agree Strongly	Familiar With Association of American Feed Control Officials Publications		Familiar With National Research Council: Nutrient Requirements for Dogs and Cats		Familiar With Small Animal Clinical Nutrition, or similar texts for professionals		Familiar With Professional websites		Yes (Please specify)	Dr lisa pierson	More than 2 hours per day	Female	41-50
1		Selected	Selected	1	1	Yes		Internet						Email group									Very much	Very much	Beneficial	Beneficial	Beneficial	Beneficial	Disagree Strongly	Agree Somewhat	Agree Strongly	Agree Somewhat	Don't Know	Disagree Strongly	Agree Strongly	Agree Strongly		Consulted Association of American Feed Control Officials Publications	Familiar With National Research Council: Nutrient Requirements for Dogs and Cats	Consulted National Research Council: Nutrient Requirements for Dogs and Cats	Familiar With Small Animal Clinical Nutrition, or similar texts for professionals	Consulted Small Animal Clinical Nutrition, or similar texts for professionals	Familiar With Professional websites	Consulted Professional websites	Yes (Please specify)	Pet food websites for product information	More than 2 hours per day	Female	18-30
1		Selected		1		Yes		Internet		Magazine	Book	Pet store employee	My veterinarian		Book, magazine or other printed source written by a veterinarian other than your own								Very much	Very much	Beneficial	Beneficial	Beneficial	Beneficial	Disagree Strongly	Agree Somewhat	Agree Somewhat	Agree Somewhat	Agree Somewhat	Disagree Strongly	Agree Somewhat	Disagree Somewhat					Familiar With Small Animal Clinical Nutrition, or similar texts for professionals		Familiar With Professional websites		No		More than 2 hours per day	Female	18-30
1		Selected	Selected	1	2	Yes			Friend/family member			Pet store employee			Book, magazine or other printed source written by a veterinarian other than your own								Very much	Very much	Beneficial	Beneficial	Beneficial	Beneficial	Disagree Strongly	Disagree Somewhat	Agree Strongly	Agree Strongly	Agree Strongly	Disagree Strongly	Agree Strongly	Agree Strongly	Familiar With Association of American Feed Control Officials Publications		Familiar With National Research Council: Nutrient Requirements for Dogs and Cats		Familiar With Small Animal Clinical Nutrition, or similar texts for professionals		Familiar With Professional websites		Yes (Please specify)	My Nutrition Professor, I am a vet student	More than 2 hours per day	Female	18-30
1		Selected	Selected	1	1	Yes		Internet										Used information from an online resource					Very much	Somewhat	Beneficial	Beneficial	Beneficial	Beneficial	Disagree Strongly	Agree Strongly	Agree Strongly	Agree Strongly	Disagree Somewhat	Disagree Somewhat	Agree Strongly	Agree Strongly							Familiar With Professional websites	Consulted Professional websites			More than 2 hours per day	Female	18-30
1			Selected		2	Yes		Internet			Book				Book, magazine or other printed source written by a veterinarian other than your own		Used a published reference source						Somewhat	Not very much	Harmful	Beneficial	Beneficial	Unnecessary	Agree Strongly	Agree Strongly	Agree Strongly	Agree Strongly	Don't Know	Don't Know	Agree Strongly	Agree Strongly											Less than one hour per day	Female	51-60
1		Selected		1		Yes		Internet					My veterinarian		Book, magazine or other printed source written by a veterinarian other than your own								Very much	Somewhat	Beneficial	Beneficial	Beneficial	Beneficial	Disagree Strongly	Disagree Somewhat	Agree Somewhat	Disagree Somewhat	Disagree Strongly	Disagree Strongly	Agree Somewhat	Agree Somewhat	Familiar With Association of American Feed Control Officials Publications	Consulted Association of American Feed Control Officials Publications	Familiar With National Research Council: Nutrient Requirements for Dogs and Cats		Familiar With Small Animal Clinical Nutrition, or similar texts for professionals	Consulted Small Animal Clinical Nutrition, or similar texts for professionals	Familiar With Professional websites		No		More than 2 hours per day	Male	18-30
1		Selected		1		Yes		Internet															Very much	Very much	Beneficial	Beneficial	Beneficial	Beneficial	Disagree Strongly	Agree Somewhat	Agree Somewhat	Agree Somewhat	Disagree Somewhat	Disagree Somewhat	Agree Strongly	Agree Somewhat	Familiar With Association of American Feed Control Officials Publications		Familiar With National Research Council: Nutrient Requirements for Dogs and Cats				Familiar With Professional websites		No		More than 2 hours per day	Female	31-40
1		Selected	Selected	4	1	Yes							My veterinarian										Very much	Very much	Beneficial	Beneficial	Beneficial	Beneficial	Disagree Somewhat	Agree Somewhat	Agree Strongly	Agree Strongly	Agree Somewhat	Disagree Strongly	Agree Strongly	Agree Strongly					Familiar With Small Animal Clinical Nutrition, or similar texts for professionals		Familiar With Professional websites		No		More than 2 hours per day	Female	31-40
1		Selected		13		Yes		Internet															Very much	Very much	Beneficial	Beneficial	Beneficial	Beneficial	Disagree Strongly	Agree Somewhat	Agree Strongly	Agree Strongly	Disagree Strongly	Disagree Strongly	Agree Strongly	Agree Somewhat	Familiar With Association of American Feed Control Officials Publications	Consulted Association of American Feed Control Officials Publications					Familiar With Professional websites	Consulted Professional websites	No		More than 2 hours per day	Male	61 or older
1		Selected		2		Yes		Internet	Friend/family member			Pet store employee											Very much	Very much	Beneficial	Beneficial	Beneficial	Beneficial	Disagree Somewhat	Disagree Somewhat	Agree Strongly	Agree Somewhat	Disagree Strongly	Disagree Strongly	Agree Somewhat	Agree Somewhat	Familiar With Association of American Feed Control Officials Publications		Familiar With National Research Council: Nutrient Requirements for Dogs and Cats		Familiar With Small Animal Clinical Nutrition, or similar texts for professionals		Familiar With Professional websites		No		More than 2 hours per day	Female	18-30
1			Selected		1	Yes	Breeder instructions or advice	Internet								Consult with a nutritionist or veterinarian		Used information from an online resource		Breeder			Somewhat	Somewhat	Beneficial	Beneficial	Beneficial	Beneficial	Agree Strongly	Agree Somewhat	Agree Somewhat	Agree Somewhat	Agree Strongly	Agree Strongly	Agree Strongly	Agree Strongly									Yes (Please specify)	Cachorro Verde	More than 2 hours per day	Female	18-30
1		Selected	Selected	3	3	Yes	Breeder instructions or advice	Internet	Friend/family member					Email group	Book, magazine or other printed source written by a veterinarian other than your own	Consult with a nutritionist or veterinarian	Used a published reference source	Used information from an online resource		Breeder			Somewhat	Not very much	Unnecessary	Beneficial	Beneficial	Beneficial	Agree Somewhat	Agree Strongly	Agree Strongly	Agree Strongly	Disagree Somewhat	Agree Strongly	Agree Strongly	Agree Strongly	Familiar With Association of American Feed Control Officials Publications		Familiar With National Research Council: Nutrient Requirements for Dogs and Cats	Consulted National Research Council: Nutrient Requirements for Dogs and Cats	Familiar With Small Animal Clinical Nutrition, or similar texts for professionals		Familiar With Professional websites		Yes (Please specify)	zoological research in captive animals	1-2 hours per day	Female	18-30
1		Selected		1		Yes		Internet															Very much	Very much	Beneficial	Beneficial	Beneficial	Beneficial	Disagree Somewhat	Agree Strongly	Agree Somewhat	Agree Strongly	Disagree Strongly	Disagree Strongly	Agree Strongly	Agree Strongly									No		More than 2 hours per day	Male	18-30
1			Selected		2	Yes									Book, magazine or other printed source written by a veterinarian other than your own								Very much	Somewhat	Beneficial	Beneficial	Beneficial	Beneficial	Agree Somewhat	Agree Strongly	Agree Strongly	Agree Strongly	Disagree Somewhat	Don't Know	Agree Strongly	Agree Strongly	Familiar With Association of American Feed Control Officials Publications			Consulted National Research Council: Nutrient Requirements for Dogs and Cats	Familiar With Small Animal Clinical Nutrition, or similar texts for professionals			Consulted Professional websites	Yes (Please specify)	multiple	1-2 hours per day	Female
1		Selected	Selected	2	2	Yes		Internet	Friend/family member		Book		My veterinarian		Book, magazine or other printed source written by a veterinarian other than your own	Consult with a nutritionist or veterinarian	Used a published reference source	Used information from an online resource					Somewhat	Somewhat	Unnecessary	Beneficial	Beneficial	Beneficial	Agree Strongly	Agree Strongly	Agree Strongly	Agree Strongly	Agree Somewhat	Agree Strongly	Agree Strongly	Agree Strongly		Consulted Association of American Feed Control Officials Publications		Consulted National Research Council: Nutrient Requirements for Dogs and Cats		Consulted Small Animal Clinical Nutrition, or similar texts for professionals		Consulted Professional websites	No		More than 2 hours per day	Female	18-30
1			Selected		2	Yes			Friend/family member														Very much	Somewhat		Beneficial	Beneficial	Unnecessary	Agree Strongly	Agree Strongly	Agree Strongly	Agree Somewhat		Don't Know	Agree Strongly	Agree Strongly									No		1-2 hours per day		61 or older
1		Selected	Selected	1	3	Yes		Internet				Pet store employee		Email group	Book, magazine or other printed source written by a veterinarian other than your own			Used information from an online resource					Very much	A little	Unnecessary	Harmful	Beneficial	Beneficial	Agree Strongly	Agree Strongly	Agree Strongly	Agree Strongly	Agree Somewhat	Agree Strongly	Agree Strongly	Agree Strongly									Yes (Please specify)	raw feeder group on Facebook & pet nutritionist	More than 2 hours per day	Female	41-50
1		Selected	Selected	3	3	Yes							My veterinarian		Book, magazine or other printed source written by a veterinarian other than your own	Consult with a nutritionist or veterinarian	Used a published reference source	Used information from an online resource					Very much	Somewhat	Harmful	Harmful	Unnecessary	Beneficial	Agree Strongly	Agree Strongly	Agree Strongly	Agree Strongly	Agree Strongly	Agree Strongly	Agree Strongly	Agree Strongly	Familiar With Association of American Feed Control Officials Publications		Familiar With National Research Council: Nutrient Requirements for Dogs and Cats		Familiar With Small Animal Clinical Nutrition, or similar texts for professionals		Familiar With Professional websites		No		More than 2 hours per day	Female	41-50
1			Selected		3	Yes			Friend/family member		Book			Email group				Used information from an online resource	Friend/family member				Somewhat	Not very much	Unnecessary	Unnecessary	Beneficial	Beneficial	Agree Strongly	Agree Strongly	Agree Strongly	Agree Strongly	Agree Strongly	Agree Strongly	Agree Strongly	Agree Strongly									Yes (Please specify)	books, online information specifically about raw	More than 2 hours per day	Female	61 or older
1		Selected		2		Yes		Internet	Friend/family member								Used a published reference source	Used information from an online resource					Very much	Not very much	Unnecessary	Unnecessary	Unnecessary	Unnecessary	Disagree Somewhat	Agree Somewhat	Agree Somewhat	Agree Strongly	Disagree Somewhat	Agree Somewhat	Agree Strongly	Agree Strongly									Yes (Please specify)	Cat Centric; Raw feeding forums	1-2 hours per day	Female	61 or older
1		Selected	Selected	1	3	Yes		Internet					My veterinarian		Book, magazine or other printed source written by a veterinarian other than your own								Very much	Somewhat	Beneficial	Beneficial	Beneficial	Beneficial	Disagree Somewhat	Agree Somewhat	Agree Strongly	Agree Strongly	Disagree Somewhat	Disagree Somewhat	Agree Strongly	Agree Strongly	Familiar With Association of American Feed Control Officials Publications		Familiar With National Research Council: Nutrient Requirements for Dogs and Cats		Familiar With Small Animal Clinical Nutrition, or similar texts for professionals	Consulted Small Animal Clinical Nutrition, or similar texts for professionals	Familiar With Professional websites	Consulted Professional websites	Yes (Please specify)	Dr wakshlag	1-2 hours per day	Female	18-30
1		Selected		3		Yes		Internet				Pet store employee				Consult with a nutritionist or veterinarian		Used information from an online resource			Pet store personnel		Somewhat	Somewhat	Beneficial	Beneficial	Beneficial	Beneficial	Agree Somewhat	Agree Strongly	Agree Somewhat	Agree Somewhat	Disagree Strongly	Agree Strongly	Don't Know	Don't Know							Familiar With Professional websites	Consulted Professional websites	No		More than 2 hours per day	Female	61 or older
1		Selected		2		Yes		Internet	Friend/family member				My veterinarian										Very much	Very much	Beneficial	Beneficial	Beneficial	Beneficial	Disagree Strongly	Disagree Somewhat	Agree Somewhat	Disagree Somewhat	Disagree Strongly	Disagree Somewhat	Agree Strongly	Agree Somewhat					Familiar With Small Animal Clinical Nutrition, or similar texts for professionals						More than 2 hours per day	Female	18-30
1		Selected		3		Yes		Internet	Friend/family member				My veterinarian	Email group									Very much	Very much	Unnecessary	Beneficial	Beneficial	Beneficial	Agree Somewhat	Agree Somewhat	Agree Strongly	Agree Somewhat	Agree Somewhat	Don't Know	Don't Know	Don't Know	Familiar With Association of American Feed Control Officials Publications		Familiar With National Research Council: Nutrient Requirements for Dogs and Cats						Yes (Please specify)	Friends who are feline only veterinarians and support groups to which I belong for Sir Hubble's illnesses	More than 2 hours per day	Female	61 or older
1			Selected		6	Yes		Internet	Friend/family member			Pet store employee											Very much	Somewhat	Unnecessary	Unnecessary	Beneficial	Beneficial	Agree Somewhat	Agree Somewhat	Agree Strongly	Agree Somewhat	Don't Know	Don't Know	Agree Strongly	Agree Strongly	Familiar With Association of American Feed Control Officials Publications		Familiar With National Research Council: Nutrient Requirements for Dogs and Cats		Familiar With Small Animal Clinical Nutrition, or similar texts for professionals			Consulted Professional websites	No		More than 2 hours per day	Female	18-30
1			Selected		2	Yes		Internet									Used a published reference source	Used information from an online resource					Very much	Not very much	Beneficial	Beneficial	Beneficial	Beneficial	Agree Somewhat	Disagree Somewhat	Agree Strongly	Disagree Somewhat	Don't Know	Agree Strongly	Agree Strongly	Agree Strongly							Familiar With Professional websites	Consulted Professional websites	Yes (Please specify)	A Brazilian website, www.cachorroverde.com.br	More than 2 hours per day	Male	31-40
1		Selected	Selected	6	1	Yes	Breeder instructions or advice	Internet	Friend/family member		Book			Email group	Book, magazine or other printed source written by a veterinarian other than your own		Used a published reference source	Used information from an online resource	Friend/family member	Breeder		Decided proportions and composition based on availability	Somewhat	Not very much	Beneficial	Beneficial	Beneficial	Unnecessary	Agree Strongly	Agree Somewhat	Don't Know	Agree Strongly	Agree Strongly	Don't Know	Don't Know	Don't Know	Familiar With Association of American Feed Control Officials Publications		Familiar With National Research Council: Nutrient Requirements for Dogs and Cats		Familiar With Small Animal Clinical Nutrition, or similar texts for professionals		Familiar With Professional websites		Yes (Please specify)	www.catinfo.org, www.feline-nutrition.org, www.truthaboutpetfood.com	1-2 hours per day	Female	18-30
1			Selected		2	Yes		Internet					My veterinarian		Book, magazine or other printed source written by a veterinarian other than your own	Consult with a nutritionist or veterinarian						Decided proportions and composition based on availability	Not very much	Not very much	Unnecessary			Beneficial	Agree Strongly	Agree Strongly	Agree Strongly			Agree Strongly	Agree Strongly	Agree Strongly								Consulted Professional websites	No		1-2 hours per day	Female	31-40
1		Selected	Selected	2	2	Yes		Internet		Magazine								Used information from an online resource					Very much	A little	Harmful	Unnecessary	Unnecessary	Unnecessary	Agree Somewhat	Agree Somewhat	Agree Strongly	Agree Somewhat	Don't Know	Agree Strongly	Agree Somewhat	Agree Strongly									No		More than 2 hours per day	Female	18-30
1			Selected		9	Yes		Internet	Friend/family member		Book	Pet store employee	My veterinarian										A little	Not very much	Unnecessary	Unnecessary	Beneficial	Beneficial	Disagree Strongly	Agree Somewhat	Disagree Strongly	Disagree Strongly		Disagree Somewhat	Disagree Strongly	Disagree Somewhat							Familiar With Professional websites		No		Less than one hour per day	Female	61 or older
1		Selected		14		Yes		Internet										Used information from an online resource	Friend/family member			Decided proportions and composition based on availability	Somewhat	Not very much					Agree Somewhat	Agree Somewhat	Agree Strongly	Agree Somewhat	Don't Know	Agree Strongly	Agree Somewhat	Agree Strongly		Consulted Association of American Feed Control Officials Publications		Consulted National Research Council: Nutrient Requirements for Dogs and Cats	Familiar With Small Animal Clinical Nutrition, or similar texts for professionals		Familiar With Professional websites		Yes (Please specify)	I worked with a software writer to develop a front end analysis program to pull data from the USDA database and compare diet composition to AAFCO and FEDIAF minimum requirements, even though those are developed for foods made with commercial animal grade	More than 2 hours per day	Female	51-60
1		Selected		2		Yes		Internet			Book							Used information from an online resource					A little	Not very much	Harmful	Harmful	Unnecessary	Beneficial	Agree Strongly	Agree Strongly	Agree Strongly	Agree Strongly	Agree Strongly	Agree Strongly	Agree Strongly	Agree Somewhat									No		More than 2 hours per day	Female	41-50
1		Selected		1		Yes		Internet	Friend/family member					Email group									Very much	Very much	Beneficial	Beneficial	Beneficial	Beneficial	Disagree Somewhat	Agree Somewhat	Agree Strongly	Agree Strongly	Disagree Strongly	Disagree Somewhat	Agree Strongly	Agree Strongly				Consulted National Research Council: Nutrient Requirements for Dogs and Cats		Consulted Small Animal Clinical Nutrition, or similar texts for professionals		Consulted Professional websites	Yes (Please specify)	skepvet.com	More than 2 hours per day	Female	31-40
1		Selected		4		Yes		Internet										Used information from an online resource					A little	Not very much	Unnecessary	Unnecessary	Unnecessary	Unnecessary	Disagree Strongly	Disagree Strongly	Disagree Strongly	Disagree Strongly	Disagree Strongly	Agree Strongly	Don't Know	Disagree Strongly									No		More than 2 hours per day	Female	31-40
1		Selected		1		No																	Somewhat	Somewhat	Unnecessary	Beneficial	Beneficial	Unnecessary	Agree Somewhat	Disagree Somewhat	Disagree Somewhat	Disagree Somewhat	Agree Strongly	Agree Strongly	Agree Somewhat	Agree Somewhat				Consulted National Research Council: Nutrient Requirements for Dogs and Cats					No		1-2 hours per day	Female	31-40
1		Selected		2		Yes		Internet							Book, magazine or other printed source written by a veterinarian other than your own	Consult with a nutritionist or veterinarian		Used information from an online resource					Somewhat	Somewhat	Beneficial	Beneficial	Beneficial	Unnecessary	Agree Strongly	Agree Strongly	Agree Strongly	Agree Strongly	Disagree Somewhat	Agree Somewhat	Don't Know	Don't Know			Familiar With National Research Council: Nutrient Requirements for Dogs and Cats						Yes (Please specify)	Feline-nutrition.org, Lisa Pierson DVM	1-2 hours per day	Female	51-60
1			Selected		4	Yes			Friend/family member								Used a published reference source	Used information from an online resource	Friend/family member			Decided proportions and composition based on availability	A little	Not very much	Unnecessary	Beneficial	Beneficial	Beneficial	Agree Somewhat	Agree Somewhat	Don't Know	Agree Strongly	Disagree Somewhat	Agree Strongly	Don't Know	Don't Know	Familiar With Association of American Feed Control Officials Publications	Consulted Association of American Feed Control Officials Publications	Familiar With National Research Council: Nutrient Requirements for Dogs and Cats	Consulted National Research Council: Nutrient Requirements for Dogs and Cats		Consulted Small Animal Clinical Nutrition, or similar texts for professionals		Consulted Professional websites			More than 2 hours per day	Female	18-30
1			Selected		2	Yes						Pet store employee				Consult with a nutritionist or veterinarian							Not very much	Not very much	Harmful	Harmful	Harmful	Beneficial	Agree Strongly	Agree Strongly	Agree Strongly	Agree Strongly	Agree Strongly	Agree Strongly	Agree Strongly	Agree Strongly	Familiar With Association of American Feed Control Officials Publications						Familiar With Professional websites		No		More than 2 hours per day	Female	51-60
1			Selected		2	Yes	Breeder instructions or advice		Friend/family member										Friend/family member				Somewhat	Somewhat	Harmful	Beneficial	Beneficial	Unnecessary	Disagree Somewhat	Agree Somewhat	Agree Somewhat	Disagree Somewhat	Don't Know	Agree Somewhat	Agree Strongly	Agree Somewhat									No		More than 2 hours per day	Female	41-50
1		Selected	Selected	4	2	Yes		Internet									Used a published reference source	Used information from an online resource					Very much	Not very much	Beneficial	Unnecessary	Beneficial	Beneficial	Disagree Somewhat	Disagree Somewhat	Agree Strongly	Agree Strongly	Agree Somewhat	Agree Strongly	Agree Somewhat	Agree Strongly									Yes (Please specify)	catinfo.org recipes, catcentric.org recipes, European Pet Food Industry Federation guidelines (which are accessible online for free)	More than 2 hours per day	Female	41-50
1		Selected	Selected	11	2	Yes									Book, magazine or other printed source written by a veterinarian other than your own	Consult with a nutritionist or veterinarian	Used a published reference source	Used information from an online resource					Somewhat	Not very much	Harmful	Harmful	Harmful	Beneficial	Agree Strongly	Agree Strongly	Agree Strongly	Agree Strongly	Agree Strongly	Agree Strongly	Agree Strongly	Agree Strongly	Familiar With Association of American Feed Control Officials Publications		Familiar With National Research Council: Nutrient Requirements for Dogs and Cats		Familiar With Small Animal Clinical Nutrition, or similar texts for professionals		Familiar With Professional websites	Consulted Professional websites	Yes (Please specify)	I am an academy member of Dogs Naturally: monthly trainings with holistic vets, and twice yearly trainings in raw feeding and canine health.	More than 2 hours per day	Female	51-60
1			Selected		2	Yes		Internet						Email group			Used a published reference source	Used information from an online resource					Not very much	Not very much	Harmful	Harmful	Unnecessary	Beneficial	Agree Strongly	Agree Strongly	Agree Strongly	Agree Strongly	Disagree Somewhat	Agree Strongly	Agree Strongly	Agree Somewhat	Familiar With Association of American Feed Control Officials Publications						Familiar With Professional websites		Yes (Please specify)	Tom Lonsdale, Ian billinghurst, Mrs Levy	1-2 hours per day	Male	41-50
1		Selected	Selected	2	4	Yes		Internet			Book				Book, magazine or other printed source written by a veterinarian other than your own		Used a published reference source	Used information from an online resource	Friend/family member				Somewhat	Not very much	Harmful	Harmful	Harmful	Beneficial	Agree Somewhat	Agree Strongly	Agree Strongly	Agree Strongly	Agree Somewhat	Agree Somewhat	Agree Strongly	Agree Somewhat	Familiar With Association of American Feed Control Officials Publications		Familiar With National Research Council: Nutrient Requirements for Dogs and Cats		Familiar With Small Animal Clinical Nutrition, or similar texts for professionals		Familiar With Professional websites		No		1-2 hours per day	Female	51-60
1		Selected		3		Yes	Breeder instructions or advice		Friend/family member				My veterinarian										Very much	Very much	Beneficial	Beneficial	Beneficial	Beneficial	Agree Somewhat	Agree Somewhat	Agree Strongly	Agree Strongly	Agree Somewhat	Disagree Strongly	Don't Know	Don't Know	Familiar With Association of American Feed Control Officials Publications		Familiar With National Research Council: Nutrient Requirements for Dogs and Cats		Familiar With Small Animal Clinical Nutrition, or similar texts for professionals		Familiar With Professional websites		No		More than 2 hours per day	Female	31-40
1		Selected	Selected	2	1	Yes			Friend/family member														Very much	Very much	Beneficial	Beneficial	Beneficial	Beneficial	Agree Strongly	Agree Strongly	Agree Strongly	Agree Strongly	Agree Strongly	Agree Strongly	Agree Strongly	Agree Strongly											More than 2 hours per day	Female	41-50
1		Selected	Selected	1	2	Yes				Magazine													Very much	Very much	Beneficial	Beneficial	Beneficial	Beneficial	Disagree Somewhat	Agree Strongly	Agree Strongly	Agree Strongly	Disagree Strongly	Disagree Strongly	Agree Strongly	Agree Somewhat									No		More than 2 hours per day	Female	61 or older
1			Selected		1	Yes		Internet					My veterinarian		Book, magazine or other printed source written by a veterinarian other than your own								Very much	Very much	Beneficial	Beneficial	Beneficial	Beneficial	Disagree Strongly	Disagree Somewhat	Agree Strongly	Agree Somewhat	Disagree Strongly	Disagree Strongly	Agree Strongly	Agree Somewhat	Familiar With Association of American Feed Control Officials Publications	Consulted Association of American Feed Control Officials Publications	Familiar With National Research Council: Nutrient Requirements for Dogs and Cats		Familiar With Small Animal Clinical Nutrition, or similar texts for professionals		Familiar With Professional websites		No		More than 2 hours per day	Female	18-30
1		Selected	Selected	2	2	Yes		Internet									Used a published reference source						Somewhat	A little	Beneficial	Beneficial	Beneficial	Beneficial	Agree Strongly	Agree Strongly	Agree Strongly	Agree Strongly	Disagree Somewhat	Agree Strongly	Agree Strongly	Agree Strongly	Familiar With Association of American Feed Control Officials Publications		Familiar With National Research Council: Nutrient Requirements for Dogs and Cats			Consulted Small Animal Clinical Nutrition, or similar texts for professionals		Consulted Professional websites			1-2 hours per day	Female	18-30
1			Selected		3	Yes		Internet									Used a published reference source						Somewhat	Somewhat	Unnecessary	Beneficial	Beneficial	Beneficial	Agree Strongly	Agree Strongly	Agree Strongly	Agree Strongly	Disagree Somewhat	Agree Somewhat	Agree Strongly	Agree Strongly		Consulted Association of American Feed Control Officials Publications	Familiar With National Research Council: Nutrient Requirements for Dogs and Cats			Consulted Small Animal Clinical Nutrition, or similar texts for professionals		Consulted Professional websites	Yes (Please specify)	Mercola Healthy Pets; Dogs Naturally, Peter Dobias, American Holistic Veterinary Association	More than 2 hours per day	Female	31-40
1		Selected	Selected	1	1	Yes		Internet	Friend/family member	Magazine	Book		My veterinarian		Book, magazine or other printed source written by a veterinarian other than your own								Very much	Somewhat	Unnecessary	Beneficial		Beneficial	Agree Strongly	Agree Strongly	Agree Somewhat	Agree Strongly	Agree Strongly	Agree Somewhat	Agree Strongly	Agree Strongly											1-2 hours per day	Female	18-30
1		Selected	Selected	1	2	Yes	Breeder instructions or advice	Internet	Friend/family member								Used a published reference source	Used information from an online resource	Friend/family member	Breeder		Decided proportions and composition based on availability	Somewhat	Not very much	Harmful	Harmful	Harmful	Beneficial	Agree Strongly	Agree Somewhat	Agree Strongly	Agree Somewhat	Agree Somewhat	Agree Strongly	Agree Strongly	Agree Strongly									Yes (Please specify)	DOGS NATURALLY MAGAZINE	More than 2 hours per day	Female	61 or older
1		Selected	Selected	4	1	Yes		Internet															Very much	Very much	Beneficial	Beneficial	Beneficial	Beneficial	Agree Somewhat	Agree Somewhat	Agree Somewhat	Agree Somewhat	Don't Know	Don't Know	Agree Strongly	Agree Strongly	Familiar With Association of American Feed Control Officials Publications	Consulted Association of American Feed Control Officials Publications		Consulted National Research Council: Nutrient Requirements for Dogs and Cats		Consulted Small Animal Clinical Nutrition, or similar texts for professionals	Familiar With Professional websites		Yes (Please specify)	Literature and/or professors lecture material regarding nutrition as it relates to health (i.e. low protein diets for CRF)	More than 2 hours per day	Female	31-40
1		Selected		10		Yes		Internet									Used a published reference source	Used information from an online resource					Somewhat	Not very much	Unnecessary	Beneficial	Beneficial	Beneficial	Disagree Somewhat	Agree Somewhat	Agree Strongly	Agree Strongly	Agree Strongly	Agree Strongly	Agree Strongly	Agree Strongly									No		More than 2 hours per day	Female	51-60
1		Selected		2		No																	Somewhat	Not very much	Harmful	Unnecessary	Unnecessary	Unnecessary	Agree Somewhat	Agree Somewhat	Agree Strongly	Agree Somewhat	Disagree Somewhat	Agree Strongly	Agree Strongly	Agree Strongly	Familiar With Association of American Feed Control Officials Publications			Consulted National Research Council: Nutrient Requirements for Dogs and Cats		Consulted Small Animal Clinical Nutrition, or similar texts for professionals		Consulted Professional websites	Yes (Please specify)		More than 2 hours per day	Female	31-40
1		Selected	Selected	2	4	Yes		Internet															Very much	Very much	Beneficial	Beneficial	Beneficial	Beneficial	Disagree Somewhat	Disagree Somewhat	Agree Strongly	Agree Somewhat	Disagree Somewhat	Disagree Strongly	Agree Strongly	Agree Somewhat	Familiar With Association of American Feed Control Officials Publications				Familiar With Small Animal Clinical Nutrition, or similar texts for professionals		Familiar With Professional websites		No		More than 2 hours per day	Female	31-40
1			Selected		4	Yes	Breeder instructions or advice		Friend/family member		Book								Friend/family member	Breeder		Decided proportions and composition based on availability	Somewhat	Not very much	Unnecessary	Harmful	Beneficial	Beneficial	Agree Somewhat	Agree Somewhat	Agree Strongly	Agree Somewhat	Don't Know	Agree Strongly	Agree Strongly	Agree Strongly									Yes (Please specify)	facebook groups and people that have been breeders/raw feeders for decades	1-2 hours per day	Female	51-60
1		Selected	Selected	1	1	Yes							My veterinarian										Very much	Very much	Beneficial	Beneficial	Beneficial	Beneficial	Disagree Strongly	Disagree Somewhat	Don't Know	Agree Somewhat	Don't Know	Disagree Somewhat	Agree Somewhat	Disagree Somewhat	Familiar With Association of American Feed Control Officials Publications		Familiar With National Research Council: Nutrient Requirements for Dogs and Cats		Familiar With Small Animal Clinical Nutrition, or similar texts for professionals		Familiar With Professional websites		No		Less than one hour per day	Male	51-60
1		Selected	Selected	2	4	Yes		Internet															Very much	Very much	Beneficial	Beneficial	Beneficial	Beneficial	Disagree Somewhat	Agree Somewhat	Disagree Somewhat	Disagree Somewhat	Disagree Strongly	Disagree Strongly	Agree Somewhat	Agree Strongly								Consulted Professional websites			More than 2 hours per day	Female	31-40
1			Selected		5	Yes	Breeder instructions or advice	Internet	Friend/family member							Consult with a nutritionist or veterinarian			Friend/family member	Breeder			Very much	Somewhat	Beneficial	Beneficial	Beneficial	Beneficial	Agree Strongly	Agree Somewhat	Agree Strongly	Agree Strongly	Agree Somewhat	Agree Somewhat	Agree Strongly	Agree Strongly							Familiar With Professional websites		No		More than 2 hours per day	Female	41-50
1			Selected		3	Yes		Internet										Used information from an online resource				Decided proportions and composition based on availability	Somewhat	Not very much	Harmful	Harmful	Harmful	Beneficial	Disagree Somewhat	Disagree Somewhat	Agree Strongly	Disagree Somewhat	Disagree Strongly	Agree Strongly	Agree Somewhat	Disagree Somewhat									No		1-2 hours per day	Female	31-40
1			Selected		1	Yes		Internet	Friend/family member														Very much	Very much	Beneficial	Beneficial	Beneficial	Beneficial	Disagree Strongly	Agree Strongly	Agree Strongly	Agree Strongly	Disagree Somewhat	Disagree Somewhat	Agree Strongly	Agree Strongly			Familiar With National Research Council: Nutrient Requirements for Dogs and Cats	Consulted National Research Council: Nutrient Requirements for Dogs and Cats	Familiar With Small Animal Clinical Nutrition, or similar texts for professionals	Consulted Small Animal Clinical Nutrition, or similar texts for professionals	Familiar With Professional websites	Consulted Professional websites	No		1-2 hours per day	Male	18-30
1			Selected		12	Yes	Breeder instructions or advice	Internet	Friend/family member					Email group			Used a published reference source	Used information from an online resource	Friend/family member				Not very much	Not very much	Beneficial	Beneficial	Beneficial	Unnecessary	Don't Know		Agree Strongly	Agree Strongly	Agree Somewhat	Agree Strongly	Agree Strongly	Don't Know									Yes (Please specify)	Raw prey diet	1-2 hours per day	Female	51-60
1			Selected		6	Yes			Friend/family member						Book, magazine or other printed source written by a veterinarian other than your own		Used a published reference source	Used information from an online resource	Friend/family member				Very much	A little	Beneficial	Beneficial	Beneficial	Beneficial	Agree Somewhat	Agree Somewhat	Agree Somewhat	Agree Somewhat	Agree Somewhat	Agree Somewhat	Agree Strongly	Agree Strongly							Familiar With Professional websites	Consulted Professional websites			More than 2 hours per day	Female	51-60
1		Selected	Selected	3	3	Yes	Breeder instructions or advice	Internet							Book, magazine or other printed source written by a veterinarian other than your own	Consult with a nutritionist or veterinarian	Used a published reference source	Used information from an online resource		Breeder			Very much	Somewhat	Beneficial	Beneficial	Beneficial	Beneficial	Agree Strongly	Agree Strongly	Agree Strongly	Agree Strongly	Agree Somewhat	Agree Strongly	Agree Strongly	Agree Strongly	Familiar With Association of American Feed Control Officials Publications			Consulted National Research Council: Nutrient Requirements for Dogs and Cats		Consulted Small Animal Clinical Nutrition, or similar texts for professionals		Consulted Professional websites	Yes (Please specify)		1-2 hours per day	Female	51-60
1			Selected		5	Yes	Breeder instructions or advice	Internet			Book							Used information from an online resource		Breeder			Very much	Not very much	Beneficial	Unnecessary	Beneficial	Beneficial	Agree Strongly	Agree Strongly	Agree Strongly	Agree Strongly	Agree Somewhat	Agree Somewhat	Agree Strongly	Disagree Somewhat							Familiar With Professional websites				1-2 hours per day	Female	41-50
1		Selected	Selected	1	1	Yes				Magazine													Very much	Very much	Beneficial	Beneficial	Beneficial	Beneficial	Disagree Somewhat	Agree Somewhat	Agree Somewhat	Agree Strongly	Disagree Strongly	Don't Know	Disagree Strongly	Agree Somewhat									No		More than 2 hours per day	Female	41-50
1			Selected		1	Yes			Friend/family member														Very much	A little	Beneficial	Beneficial	Beneficial	Beneficial	Agree Strongly	Agree Strongly	Agree Strongly	Agree Strongly	Agree Somewhat	Agree Somewhat	Agree Strongly	Agree Strongly	Familiar With Association of American Feed Control Officials Publications		Familiar With National Research Council: Nutrient Requirements for Dogs and Cats		Familiar With Small Animal Clinical Nutrition, or similar texts for professionals		Familiar With Professional websites		No		More than 2 hours per day	Female	51-60
1			Selected		4	Yes	Breeder instructions or advice			Magazine	Book						Used a published reference source						Not very much	Not very much	Harmful	Harmful	Harmful	Beneficial	Agree Somewhat	Agree Somewhat	Agree Strongly	Agree Strongly	Agree Somewhat	Agree Strongly	Agree Strongly	Don't Know	Familiar With Association of American Feed Control Officials Publications		Familiar With National Research Council: Nutrient Requirements for Dogs and Cats		Familiar With Small Animal Clinical Nutrition, or similar texts for professionals		Familiar With Professional websites		No		1-2 hours per day	Female	51-60
1			Selected		7	No																	Somewhat	A little	Beneficial	Beneficial	Beneficial	Beneficial	Agree Somewhat	Agree Strongly	Agree Strongly	Agree Strongly	Agree Strongly	Agree Strongly	Agree Strongly	Agree Strongly							Familiar With Professional websites		Yes (Please specify)	Dr Wessels DVM.....from Abady foods..	More than 2 hours per day	Female	51-60
1			Selected		2	Yes			Friend/family member				My veterinarian			Consult with a nutritionist or veterinarian							Somewhat	Somewhat	Beneficial	Beneficial	Beneficial	Beneficial	Agree Strongly	Agree Somewhat	Agree Strongly	Agree Somewhat	Agree Somewhat	Agree Somewhat	Agree Strongly	Agree Somewhat									No		1-2 hours per day	Female	51-60
1			Selected		1	Yes		Internet							Book, magazine or other printed source written by a veterinarian other than your own								Very much	Somewhat	Beneficial	Beneficial	Beneficial	Beneficial	Disagree Strongly	Disagree Strongly	Disagree Strongly	Disagree Strongly	Disagree Strongly	Disagree Strongly	Don't Know	Don't Know									No		1-2 hours per day	Female	18-30
1		Selected	Selected	2	2	No																	Somewhat	A little	Unnecessary	Unnecessary	Beneficial	Beneficial	Agree Strongly	Agree Strongly	Disagree Somewhat	Agree Somewhat	Agree Somewhat	Agree Somewhat	Agree Strongly	Agree Strongly									Yes (Please specify)	Balance It	Less than one hour per day	Female	41-50
1			Selected		2	Yes	Breeder instructions or advice				Book											Decided proportions and composition based on availability	Very much	Somewhat		Harmful	Beneficial	Unnecessary	Agree Strongly	Agree Strongly	Agree Strongly	Agree Strongly	Agree Somewhat	Agree Strongly	Agree Strongly	Don't Know									Yes (Please specify)	BARF	Less than one hour per day	Female	61 or older
1		Selected	Selected	2	1	Yes	Breeder instructions or advice	Internet			Book		My veterinarian		Book, magazine or other printed source written by a veterinarian other than your own	Consult with a nutritionist or veterinarian	Used a published reference source	Used information from an online resource					Very much	A little	Beneficial	Beneficial	Beneficial	Beneficial	Agree Somewhat	Agree Somewhat	Agree Strongly	Disagree Somewhat	Disagree Somewhat	Disagree Somewhat	Don't Know	Don't Know				Consulted National Research Council: Nutrient Requirements for Dogs and Cats		Consulted Small Animal Clinical Nutrition, or similar texts for professionals		Consulted Professional websites	Yes (Please specify)	Texts written by veterinary nutritionists or recommended by veterinary nutritionists	1-2 hours per day	Female	31-40
1			Selected		2	Yes		Internet	Friend/family member	Magazine			My veterinarian		Book, magazine or other printed source written by a veterinarian other than your own								Very much	Very much	Beneficial	Beneficial	Beneficial	Beneficial	Agree Somewhat	Agree Strongly	Agree Strongly	Agree Strongly	Agree Somewhat	Disagree Somewhat	Agree Strongly	Agree Strongly	Familiar With Association of American Feed Control Officials Publications		Familiar With National Research Council: Nutrient Requirements for Dogs and Cats		Familiar With Small Animal Clinical Nutrition, or similar texts for professionals		Familiar With Professional websites		No		1-2 hours per day	Female	41-50
1			Selected		2	Yes		Internet	Friend/family member	Magazine	Book	Pet store employee											Very much	Somewhat	Beneficial	Beneficial	Beneficial	Beneficial	Disagree Strongly	Agree Somewhat	Agree Strongly	Agree Somewhat	Disagree Strongly	Disagree Strongly	Agree Strongly	Agree Strongly		Consulted Association of American Feed Control Officials Publications		Consulted National Research Council: Nutrient Requirements for Dogs and Cats		Consulted Small Animal Clinical Nutrition, or similar texts for professionals		Consulted Professional websites	Yes (Please specify)	DACVN Veterinary Nutritionists at Universities, Private Practice and Industry	More than 2 hours per day	Female	41-50
1		Selected	Selected	2	2	Yes		Internet								Consult with a nutritionist or veterinarian	Used a published reference source	Used information from an online resource					Very much	Somewhat	Beneficial	Beneficial	Beneficial	Beneficial	Agree Strongly	Agree Strongly	Agree Strongly	Agree Strongly	Disagree Strongly	Disagree Somewhat	Agree Strongly	Agree Strongly									Yes (Please specify)	My veterinarian	1-2 hours per day	Female	18-30
1		Selected	Selected	2	2	Yes		Internet							Book, magazine or other printed source written by a veterinarian other than your own		Used a published reference source	Used information from an online resource					Not very much	Not very much	Unnecessary	Harmful	Unnecessary	Beneficial	Disagree Somewhat	Agree Somewhat	Agree Strongly	Agree Strongly	Disagree Somewhat	Agree Strongly	Agree Strongly	Agree Strongly							Familiar With Professional websites	Consulted Professional websites	No		1-2 hours per day	Female	41-50
1		Selected		2		Yes							My veterinarian			Consult with a nutritionist or veterinarian		Used information from an online resource					Somewhat	Somewhat	Unnecessary	Harmful	Harmful	Unnecessary	Agree Strongly	Agree Strongly	Agree Somewhat	Agree Somewhat	Agree Somewhat	Agree Strongly	Agree Strongly	Agree Strongly												Female	41-50
1			Selected		6	Yes			Friend/family member		Book			Email group									Somewhat	Not very much	Unnecessary	Beneficial	Unnecessary	Unnecessary	Agree Strongly	Agree Strongly	Agree Strongly	Agree Strongly	Agree Somewhat	Agree Strongly	Agree Strongly	Agree Strongly	Familiar With Association of American Feed Control Officials Publications				Familiar With Small Animal Clinical Nutrition, or similar texts for professionals		Familiar With Professional websites		Yes (Please specify)		1-2 hours per day	Female	61 or older
1		Selected		11		Yes				Magazine													Somewhat	A little	Harmful	Harmful	Harmful	Beneficial	Agree Strongly	Agree Strongly	Agree Somewhat	Agree Strongly	Don't Know	Don't Know	Agree Strongly	Agree Strongly									No		More than 2 hours per day	Female	51-60
1			Selected		4	Yes			Friend/family member	Magazine					Book, magazine or other printed source written by a veterinarian other than your own								Very much	Very much	Beneficial	Beneficial	Beneficial	Beneficial	Agree Strongly	Agree Strongly	Agree Strongly	Agree Strongly	Agree Strongly	Agree Strongly	Agree Strongly	Agree Strongly									No		1-2 hours per day	Female	51-60
1		Selected	Selected	5	2	Yes			Friend/family member														Very much	Very much	Beneficial	Beneficial	Beneficial	Beneficial	Agree Strongly	Agree Strongly	Agree Somewhat	Agree Strongly	Disagree Strongly	Agree Strongly	Agree Strongly	Agree Strongly									No		1-2 hours per day	Female	51-60
1			Selected		3	Yes	Breeder instructions or advice	Internet	Friend/family member		Book							Used information from an online resource				Decided proportions and composition based on availability	Somewhat	Somewhat	Beneficial	Beneficial	Beneficial	Beneficial	Agree Somewhat	Agree Somewhat	Agree Strongly	Agree Somewhat	Disagree Somewhat	Agree Strongly	Agree Strongly	Agree Strongly							Familiar With Professional websites		No		More than 2 hours per day	Female	18-30
1		Selected	Selected	1	1	Yes		Internet	Friend/family member									Used information from an online resource					Very much	Very much	Beneficial	Beneficial	Unnecessary	Unnecessary	Agree Strongly	Agree Strongly	Agree Strongly	Agree Strongly	Disagree Somewhat	Agree Somewhat	Agree Strongly	Agree Somewhat									No		More than 2 hours per day	Female	41-50
1		Selected	Selected	1	2	Yes		Internet						Email group									Somewhat	Somewhat	Beneficial	Beneficial	Beneficial	Beneficial	Agree Somewhat	Agree Somewhat	Disagree Somewhat	Disagree Somewhat	Disagree Somewhat	Don't Know	Disagree Strongly	Agree Strongly									No		More than 2 hours per day	Female	61 or older
1			Selected		2	Yes		Internet	Friend/family member								Used a published reference source						Somewhat	Somewhat	Beneficial	Beneficial	Beneficial	Beneficial	Agree Somewhat	Agree Somewhat	Agree Somewhat	Agree Somewhat	Agree Somewhat	Don't Know	Agree Strongly	Agree Strongly								Consulted Professional websites	Yes (Please specify)	commercial petfood recommendations	Less than one hour per day	Female	51-60
1		Selected		1		Yes		Internet	Friend/family member														Somewhat	Not very much	Beneficial	Beneficial	Beneficial	Beneficial	Disagree Somewhat	Agree Somewhat	Agree Somewhat	Agree Somewhat	Agree Somewhat	Don't Know	Agree Strongly	Agree Strongly						Consulted Small Animal Clinical Nutrition, or similar texts for professionals	Familiar With Professional websites		Yes (Please specify)	Various websites	More than 2 hours per day	Female	18-30
1		Selected		2		No																	Very much	Very much	Unnecessary	Unnecessary	Unnecessary	Unnecessary	Disagree Somewhat	Disagree Somewhat	Agree Somewhat	Agree Strongly	Agree Strongly	Agree Somewhat	Agree Strongly	Disagree Somewhat									No		Less than one hour per day	Female	51-60
1			Selected		3	Yes			Friend/family member														Very much	Very much	Beneficial	Beneficial	Beneficial	Beneficial	Agree Somewhat	Agree Somewhat	Agree Strongly	Agree Strongly	Agree Strongly	Agree Strongly	Agree Strongly	Agree Somewhat									No		1-2 hours per day	Male	61 or older
1			Selected		1	Yes		Internet							Book, magazine or other printed source written by a veterinarian other than your own			Used information from an online resource				Decided proportions and composition based on availability	A little	Not very much	Harmful	Harmful	Harmful	Beneficial	Agree Strongly	Agree Strongly	Agree Strongly	Agree Strongly	Agree Strongly	Agree Strongly	Agree Strongly	Agree Strongly									No		1-2 hours per day	Female	41-50
1		Selected		2		Yes		Internet		Magazine	Book	Pet store employee	My veterinarian		Book, magazine or other printed source written by a veterinarian other than your own								Very much	Very much	Beneficial	Beneficial	Beneficial	Beneficial	Disagree Strongly	Agree Somewhat	Don't Know	Don't Know	Disagree Strongly	Disagree Strongly	Don't Know	Don't Know	Familiar With Association of American Feed Control Officials Publications		Familiar With National Research Council: Nutrient Requirements for Dogs and Cats	Consulted National Research Council: Nutrient Requirements for Dogs and Cats	Familiar With Small Animal Clinical Nutrition, or similar texts for professionals	Consulted Small Animal Clinical Nutrition, or similar texts for professionals	Familiar With Professional websites	Consulted Professional websites	Yes (Please specify)	Hills pet nutrition	More than 2 hours per day	Female	18-30
1		Selected		6		Yes		Internet															Somewhat	Somewhat	Unnecessary	Unnecessary	Unnecessary	Beneficial	Agree Strongly	Agree Somewhat	Agree Strongly	Agree Somewhat	Agree Somewhat	Agree Strongly	Agree Strongly	Agree Strongly							Familiar With Professional websites		Yes (Please specify)	websites and Facebook groups devoted to specific illnesses such as CRF, IBD, and EPI	More than 2 hours per day	Female	51-60
1		Selected		11		No																	Very much	Not very much	Harmful	Unnecessary	Unnecessary	Beneficial	Agree Strongly	Disagree Somewhat	Agree Strongly	Agree Somewhat	Agree Somewhat	Agree Strongly	Agree Strongly	Agree Strongly			Familiar With National Research Council: Nutrient Requirements for Dogs and Cats		Familiar With Small Animal Clinical Nutrition, or similar texts for professionals	Consulted Small Animal Clinical Nutrition, or similar texts for professionals	Familiar With Professional websites	Consulted Professional websites			More than 2 hours per day	Female	31-40
1		Selected		2		Yes						Pet store employee											Very much	Very much	Beneficial	Beneficial	Beneficial	Beneficial	Agree Somewhat	Disagree Somewhat	Disagree Somewhat	Agree Somewhat	Don't Know	Agree Strongly	Agree Somewhat	Agree Somewhat									No		1-2 hours per day	Female	51-60
1		Selected	Selected	6	3	Yes		Internet					My veterinarian			Consult with a nutritionist or veterinarian	Used a published reference source	Used information from an online resource					Very much	Somewhat	Beneficial	Beneficial	Beneficial	Beneficial	Agree Somewhat	Agree Somewhat	Agree Strongly	Agree Strongly	Disagree Somewhat	Agree Somewhat	Agree Strongly	Agree Somewhat	Familiar With Association of American Feed Control Officials Publications		Familiar With National Research Council: Nutrient Requirements for Dogs and Cats		Familiar With Small Animal Clinical Nutrition, or similar texts for professionals		Familiar With Professional websites		Yes (Please specify)	Cat nutrition. Org	More than 2 hours per day	Female	31-40
1		Selected	Selected	1	3	Yes		Internet								Consult with a nutritionist or veterinarian		Used information from an online resource		Breeder			Very much	Not very much	Beneficial	Harmful	Beneficial	Beneficial	Agree Strongly	Agree Strongly	Agree Strongly	Agree Strongly	Agree Strongly	Agree Strongly	Agree Strongly	Agree Strongly		Consulted Association of American Feed Control Officials Publications	Familiar With National Research Council: Nutrient Requirements for Dogs and Cats		Familiar With Small Animal Clinical Nutrition, or similar texts for professionals			Consulted Professional websites	Yes (Please specify)	Raw fed groups on Facebook	More than 2 hours per day	Female	51-60
1			Selected		5	Yes	Breeder instructions or advice	Internet			Book				Book, magazine or other printed source written by a veterinarian other than your own	Consult with a nutritionist or veterinarian	Used a published reference source	Used information from an online resource		Breeder			Somewhat	Somewhat	Unnecessary	Unnecessary	Beneficial		Agree Strongly	Agree Strongly	Agree Strongly	Agree Strongly	Agree Strongly	Agree Strongly	Agree Strongly	Agree Strongly											1-2 hours per day	Female	41-50
1		Selected		1		Yes		Internet			Book				Book, magazine or other printed source written by a veterinarian other than your own		Used a published reference source	Used information from an online resource			Pet store personnel		Very much	Somewhat	Beneficial	Unnecessary	Unnecessary	Beneficial	Agree Somewhat	Agree Somewhat	Agree Strongly	Agree Somewhat	Agree Somewhat	Agree Strongly	Agree Strongly	Agree Strongly	Familiar With Association of American Feed Control Officials Publications	Consulted Association of American Feed Control Officials Publications	Familiar With National Research Council: Nutrient Requirements for Dogs and Cats			Consulted Small Animal Clinical Nutrition, or similar texts for professionals	Familiar With Professional websites	Consulted Professional websites	Yes (Please specify)	Truth about pet food, ibd kitties.net, littlebigcat	1-2 hours per day	Female	31-40
1			Selected		1	Yes		Internet	Friend/family member									Used information from an online resource	Friend/family member				Very much	Somewhat	Unnecessary	Unnecessary	Beneficial	Beneficial	Disagree Somewhat	Disagree Somewhat	Agree Strongly	Agree Somewhat	Disagree Somewhat	Agree Somewhat	Agree Strongly	Agree Strongly							Familiar With Professional websites		No		More than 2 hours per day	Female	18-30
1			Selected		1	Yes			Friend/family member														Very much	Very much	Unnecessary	Beneficial	Beneficial	Beneficial	Agree Strongly	Agree Somewhat	Agree Somewhat	Agree Strongly	Disagree Strongly	Disagree Strongly	Agree Strongly	Agree Strongly								Consulted Professional websites			More than 2 hours per day	Female	41-50
1		Selected	Selected	2	2	Yes		Internet	Friend/family member			Pet store employee						Used information from an online resource	Friend/family member	Breeder	Pet store personnel		A little	Not very much	Unnecessary	Beneficial	Beneficial	Beneficial	Agree Somewhat	Agree Somewhat	Agree Strongly	Agree Somewhat	Agree Somewhat	Agree Strongly	Agree Strongly	Don't Know									Yes (Please specify)	Raw Feeding Groups online	More than 2 hours per day	Female	18-30
1			Selected		1	Yes		Internet		Magazine	Book		My veterinarian		Book, magazine or other printed source written by a veterinarian other than your own	Consult with a nutritionist or veterinarian	Used a published reference source						Somewhat	Not very much	Harmful	Harmful	Beneficial	Beneficial	Disagree Somewhat	Agree Somewhat	Agree Strongly	Agree Strongly	Disagree Somewhat	Agree Strongly	Agree Strongly	Agree Strongly									Yes (Please specify)	Animal Wellness and Dogs Naturally magazines, Dr. Becker's blog, my vet's book - Dr. Royal.	1-2 hours per day	Female	51-60
1		Selected	Selected	5	3	Yes		Internet	Friend/family member														Very much	Very much	Beneficial	Beneficial	Beneficial	Beneficial	Disagree Somewhat	Disagree Strongly	Agree Strongly	Agree Strongly	Disagree Strongly	Disagree Strongly	Agree Strongly	Agree Somewhat	Familiar With Association of American Feed Control Officials Publications				Familiar With Small Animal Clinical Nutrition, or similar texts for professionals				No		More than 2 hours per day	Female	41-50
1			Selected		1	Yes	Breeder instructions or advice	Internet	Friend/family member	Magazine	Book	Pet store employee		Email group	Book, magazine or other printed source written by a veterinarian other than your own	Consult with a nutritionist or veterinarian	Used a published reference source	Used information from an online resource	Friend/family member	Breeder	Pet store personnel	Decided proportions and composition based on availability	Somewhat	Somewhat	Beneficial	Beneficial	Beneficial	Beneficial	Agree Strongly	Agree Strongly	Agree Strongly	Agree Strongly	Agree Somewhat	Agree Strongly	Agree Strongly	Agree Strongly	Familiar With Association of American Feed Control Officials Publications		Familiar With National Research Council: Nutrient Requirements for Dogs and Cats			Consulted Small Animal Clinical Nutrition, or similar texts for professionals	Familiar With Professional websites		No		1-2 hours per day	Female	31-40
1		Selected		3		Yes		Internet								Consult with a nutritionist or veterinarian		Used information from an online resource					Somewhat	Very much	Beneficial	Beneficial	Beneficial	Beneficial	Agree Strongly	Agree Somewhat	Agree Somewhat	Agree Somewhat	Agree Strongly	Agree Strongly	Agree Strongly	Agree Strongly									No		Less than one hour per day	Female	41-50
1			Selected		2	Yes	Breeder instructions or advice	Internet	Friend/family member					Email group	Book, magazine or other printed source written by a veterinarian other than your own		Used a published reference source	Used information from an online resource	Friend/family member	Breeder		Decided proportions and composition based on availability	Somewhat	Not very much	Beneficial	Beneficial	Beneficial	Beneficial	Agree Somewhat	Agree Somewhat	Agree Strongly	Agree Strongly	Don't Know	Agree Somewhat	Agree Strongly	Don't Know			Familiar With National Research Council: Nutrient Requirements for Dogs and Cats					Consulted Professional websites	No		Less than one hour per day	Female	51-60
1			Selected		1	Yes	Breeder instructions or advice																Very much	Very much	Beneficial	Beneficial	Beneficial	Beneficial	Agree Somewhat	Agree Somewhat	Agree Somewhat	Agree Strongly	Agree Strongly	Agree Somewhat	Don't Know	Don't Know									No		1-2 hours per day	Female	31-40
1			Selected		3	Yes							My veterinarian			Consult with a nutritionist or veterinarian							Somewhat	Very much	Beneficial	Beneficial	Beneficial	Beneficial	Agree Strongly	Agree Strongly	Agree Strongly	Agree Strongly	Agree Somewhat	Agree Somewhat	Agree Strongly		Familiar With Association of American Feed Control Officials Publications	Consulted Association of American Feed Control Officials Publications	Familiar With National Research Council: Nutrient Requirements for Dogs and Cats	Consulted National Research Council: Nutrient Requirements for Dogs and Cats	Familiar With Small Animal Clinical Nutrition, or similar texts for professionals	Consulted Small Animal Clinical Nutrition, or similar texts for professionals	Familiar With Professional websites	Consulted Professional websites	Yes (Please specify)	I am a veterinarian so this truly is a hard survey and questions for me to answer.	More than 2 hours per day	Female	41-50
1		Selected	Selected	1	2	Yes		Internet					My veterinarian			Consult with a nutritionist or veterinarian		Used information from an online resource					Very much	Very much	Beneficial	Beneficial	Beneficial	Beneficial	Agree Somewhat	Agree Strongly	Agree Strongly	Agree Strongly	Agree Somewhat	Agree Somewhat	Agree Strongly	Agree Strongly					Familiar With Small Animal Clinical Nutrition, or similar texts for professionals				No		More than 2 hours per day	Female	18-30
1			Selected		1	Yes			Friend/family member														Very much	Somewhat	Beneficial	Beneficial	Beneficial	Beneficial	Agree Strongly	Agree Strongly	Agree Strongly	Agree Strongly	Disagree Strongly	Agree Somewhat	Agree Strongly	Agree Strongly				Consulted National Research Council: Nutrient Requirements for Dogs and Cats		Consulted Small Animal Clinical Nutrition, or similar texts for professionals			No		Less than one hour per day	Female	51-60
1		Selected	Selected	1	1	Yes		Internet	Friend/family member								Used a published reference source	Used information from an online resource	Friend/family member				Somewhat	Somewhat	Beneficial	Beneficial	Beneficial	Beneficial	Agree Somewhat	Agree Somewhat	Disagree Somewhat	Disagree Somewhat	Agree Somewhat	Disagree Somewhat	Disagree Strongly	Disagree Strongly									No		More than 2 hours per day	Female	18-30
1		Selected	Selected	1	1	Yes		Internet			Book			Email group									Somewhat	Somewhat	Beneficial	Beneficial	Beneficial	Beneficial	Agree Strongly	Agree Strongly	Agree Somewhat	Agree Strongly	Agree Somewhat	Agree Somewhat	Agree Strongly	Agree Strongly									Yes (Please specify)	website- dog food advisor . com	1-2 hours per day	Female	41-50
1		Selected	Selected	5	1	Yes	Breeder instructions or advice	Internet		Magazine	Book				Book, magazine or other printed source written by a veterinarian other than your own		Used a published reference source	Used information from an online resource					A little	Somewhat				Beneficial	Agree Strongly	Agree Strongly	Agree Strongly	Agree Strongly	Agree Somewhat	Agree Somewhat	Agree Strongly	Agree Strongly	Familiar With Association of American Feed Control Officials Publications		Familiar With National Research Council: Nutrient Requirements for Dogs and Cats				Familiar With Professional websites		Yes (Please specify)	truth about pet food Facebook and website, planet paws Facebook and Rodney Habibs Facebook, Dr Dodds blog and her book Canine nutrigenomics, pet food divas website and Facebook, Steves real food Facebook and website, raw essentials Facebook and website ru	More than 2 hours per day	Female	41-50
1		Selected	Selected	2	3	Yes		Internet						Email group				Used information from an online resource				Decided proportions and composition based on availability	Somewhat	A little	Beneficial	Beneficial	Beneficial	Beneficial	Agree Somewhat	Disagree Somewhat	Agree Strongly	Agree Somewhat	Don't Know	Agree Strongly	Agree Somewhat	Agree Strongly	Familiar With Association of American Feed Control Officials Publications						Familiar With Professional websites		No		More than 2 hours per day	Female	18-30
1		Selected	Selected	1	2	Yes		Internet	Friend/family member				My veterinarian		Book, magazine or other printed source written by a veterinarian other than your own	Consult with a nutritionist or veterinarian	Used a published reference source	Used information from an online resource					Very much	Very much	Beneficial	Harmful	Beneficial	Beneficial	Agree Strongly	Agree Strongly	Agree Strongly	Agree Strongly	Agree Strongly	Agree Strongly	Agree Strongly	Agree Strongly		Consulted Association of American Feed Control Officials Publications		Consulted National Research Council: Nutrient Requirements for Dogs and Cats		Consulted Small Animal Clinical Nutrition, or similar texts for professionals		Consulted Professional websites	Yes (Please specify)	cachorro verde	More than 2 hours per day	Female	18-30
1		Selected	Selected	2	2	Yes	Breeder instructions or advice	Internet							Book, magazine or other printed source written by a veterinarian other than your own		Used a published reference source	Used information from an online resource					Very much	Not very much	Beneficial	Beneficial	Beneficial	Beneficial	Agree Strongly	Agree Strongly	Agree Strongly	Agree Strongly	Don't Know	Agree Somewhat	Agree Strongly	Agree Strongly	Familiar With Association of American Feed Control Officials Publications					Consulted Small Animal Clinical Nutrition, or similar texts for professionals		Consulted Professional websites			More than 2 hours per day	Female	41-50
1		Selected	Selected	3	2	Yes			Friend/family member													Decided proportions and composition based on availability	Somewhat	Not very much	Beneficial	Beneficial	Beneficial	Beneficial	Agree Somewhat	Disagree Somewhat	Agree Somewhat	Agree Somewhat	Agree Strongly	Agree Strongly	Agree Strongly	Agree Somewhat									No		More than 2 hours per day	Female	18-30
1			Selected		5	Yes									Book, magazine or other printed source written by a veterinarian other than your own		Used a published reference source						Somewhat	Somewhat	Harmful	Beneficial	Beneficial	Beneficial	Agree Strongly	Agree Strongly	Agree Somewhat	Agree Somewhat	Disagree Somewhat	Agree Somewhat	Agree Strongly	Agree Strongly									Yes (Please specify)	Vet Tannetje koning	1-2 hours per day	Female	51-60
1		Selected	Selected	2	2	Yes		Internet															Somewhat	Somewhat	Beneficial	Beneficial	Beneficial	Beneficial	Agree Strongly	Agree Strongly	Agree Strongly	Agree Strongly	Don't Know	Don't Know	Agree Strongly	Agree Strongly	Familiar With Association of American Feed Control Officials Publications		Familiar With National Research Council: Nutrient Requirements for Dogs and Cats		Familiar With Small Animal Clinical Nutrition, or similar texts for professionals		Familiar With Professional websites				More than 2 hours per day	Female	18-30
1			Selected		1	No																	Very much	Very much	Beneficial	Beneficial	Beneficial	Beneficial	Agree Somewhat	Agree Somewhat	Agree Somewhat	Agree Somewhat	Disagree Somewhat	Disagree Somewhat	Agree Somewhat	Agree Somewhat									No		1-2 hours per day	Male	61 or older
1			Selected		1	Yes		Internet	Friend/family member				My veterinarian										Very much	Very much	Beneficial	Unnecessary	Beneficial	Beneficial	Agree Somewhat	Agree Strongly	Agree Somewhat	Agree Strongly	Agree Somewhat	Agree Somewhat	Agree Strongly	Agree Strongly									Yes (Please specify)	My vet.	More than 2 hours per day	Female	51-60
1			Selected		1	Yes			Friend/family member							Consult with a nutritionist or veterinarian							Very much	Somewhat	Beneficial	Beneficial	Beneficial	Beneficial	Agree Somewhat	Agree Strongly	Agree Strongly	Agree Strongly	Agree Somewhat	Agree Somewhat	Agree Strongly	Don't Know											More than 2 hours per day	Female	61 or older
1		Selected	Selected	1	1	Yes			Friend/family member				My veterinarian										Somewhat	Somewhat	Beneficial	Beneficial	Beneficial	Beneficial	Agree Strongly	Agree Strongly	Agree Strongly	Agree Strongly	Disagree Somewhat	Agree Somewhat	Agree Strongly	Agree Strongly									No		1-2 hours per day	Female	61 or older
1		Selected	Selected	9	1	Yes		Internet															Somewhat	A little	Beneficial	Beneficial	Beneficial	Unnecessary	Agree Strongly	Agree Strongly	Agree Strongly	Agree Strongly	Agree Strongly	Agree Strongly	Agree Strongly	Agree Strongly							Familiar With Professional websites		Yes (Please specify)	http://www.catinfo.org/?link=makingcatfood	More than 2 hours per day	Female	51-60
1			Selected		3	Yes		Internet	Friend/family member		Book			Email group	Book, magazine or other printed source written by a veterinarian other than your own		Used a published reference source	Used information from an online resource	Friend/family member				A little	Not very much	Harmful	Harmful	Beneficial	Beneficial	Agree Strongly	Agree Strongly	Agree Strongly	Agree Strongly		Agree Somewhat	Agree Strongly	Agree Strongly	Familiar With Association of American Feed Control Officials Publications				Familiar With Small Animal Clinical Nutrition, or similar texts for professionals		Familiar With Professional websites		No		More than 2 hours per day	Female	51-60
1			Selected		4	Yes		Internet	Friend/family member		Book			Email group	Book, magazine or other printed source written by a veterinarian other than your own		Used a published reference source	Used information from an online resource	Friend/family member				Very much	A little	Unnecessary	Harmful	Beneficial	Unnecessary	Agree Somewhat	Agree Somewhat	Agree Strongly	Agree Strongly	Agree Somewhat	Agree Somewhat	Agree Somewhat	Agree Strongly	Familiar With Association of American Feed Control Officials Publications	Consulted Association of American Feed Control Officials Publications	Familiar With National Research Council: Nutrient Requirements for Dogs and Cats		Familiar With Small Animal Clinical Nutrition, or similar texts for professionals		Familiar With Professional websites		No		More than 2 hours per day	Female	51-60
1		Selected	Selected	3	1	Yes			Friend/family member								Used a published reference source						Very much	Somewhat	Beneficial	Beneficial	Beneficial	Unnecessary	Agree Strongly	Agree Strongly	Agree Strongly	Agree Strongly	Agree Somewhat	Agree Strongly	Agree Strongly	Don't Know									Yes (Please specify)		1-2 hours per day	Female	61 or older
1		Selected		3		Yes		Internet						Email group	Book, magazine or other printed source written by a veterinarian other than your own	Consult with a nutritionist or veterinarian	Used a published reference source	Used information from an online resource					Somewhat	Not very much	Unnecessary			Beneficial	Agree Somewhat	Agree Somewhat	Agree Strongly	Agree Strongly	Agree Somewhat	Agree Strongly	Agree Strongly	Agree Strongly		Consulted Association of American Feed Control Officials Publications				Consulted Small Animal Clinical Nutrition, or similar texts for professionals		Consulted Professional websites	Yes (Please specify)		More than 2 hours per day	Female	18-30
1		Selected	Selected	1	1	Yes		Internet															Very much	Very much	Beneficial	Beneficial	Beneficial	Beneficial	Agree Somewhat	Agree Somewhat	Agree Somewhat	Agree Strongly	Disagree Somewhat	Disagree Somewhat	Agree Somewhat	Agree Strongly									No		1-2 hours per day	Female	51-60
1		Selected		2		Yes		Internet	Friend/family member						Book, magazine or other printed source written by a veterinarian other than your own			Used information from an online resource					Very much	Somewhat	Beneficial	Beneficial	Beneficial	Beneficial	Agree Somewhat	Agree Strongly	Agree Strongly	Agree Strongly	Disagree Strongly	Agree Strongly	Agree Strongly	Agree Strongly				Consulted National Research Council: Nutrient Requirements for Dogs and Cats				Consulted Professional websites	Yes (Please specify)	www.catinfo.org; www.feline-nutrition.org; www.littlebigcat.com	More than 2 hours per day	Female	51-60
1			Selected		4	Yes		Internet									Used a published reference source						Not very much	Not very much	Harmful	Harmful	Harmful	Beneficial	Agree Strongly	Agree Somewhat	Agree Strongly	Agree Somewhat	Agree Somewhat	Agree Strongly	Agree Strongly	Don't Know											1-2 hours per day	Female	41-50
1		Selected	Selected	6	5	Yes	Breeder instructions or advice			Magazine		Pet store employee											Very much	Very much	Unnecessary	Beneficial	Beneficial	Beneficial	Agree Strongly	Agree Somewhat	Agree Strongly	Agree Somewhat	Disagree Strongly	Disagree Somewhat	Agree Strongly	Agree Strongly	Familiar With Association of American Feed Control Officials Publications		Familiar With National Research Council: Nutrient Requirements for Dogs and Cats		Familiar With Small Animal Clinical Nutrition, or similar texts for professionals		Familiar With Professional websites		Yes (Please specify)	dogfoodadvisor.com	More than 2 hours per day	Female	51-60
1			Selected		2	No																	Very much	Very much	Beneficial	Beneficial	Beneficial		Don't Know	Agree Strongly	Agree Strongly	Agree Strongly													Yes (Please specify)	Hill prescription foods	1-2 hours per day	Female	61 or older
1		Selected	Selected	1	3	Yes							My veterinarian										A little	Not very much	Harmful	Harmful	Beneficial	Beneficial	Agree Strongly	Agree Somewhat	Agree Strongly	Agree Somewhat	Agree Somewhat	Agree Strongly	Agree Strongly	Agree Strongly	Familiar With Association of American Feed Control Officials Publications		Familiar With National Research Council: Nutrient Requirements for Dogs and Cats				Familiar With Professional websites		No		More than 2 hours per day	Male	51-60
1			Selected		1	Yes	Breeder instructions or advice																Very much	Very much	Beneficial	Beneficial	Beneficial	Beneficial	Agree Somewhat	Agree Somewhat	Agree Somewhat	Agree Somewhat	Disagree Somewhat	Disagree Somewhat	Agree Strongly	Agree Somewhat									No		More than 2 hours per day	Female	51-60
1		Selected	Selected	3	2	No																	Not very much	Not very much	Harmful	Beneficial	Beneficial	Beneficial	Disagree Somewhat	Disagree Strongly	Disagree Strongly	Disagree Strongly	Agree Strongly	Disagree Strongly	Disagree Strongly	Disagree Strongly									Yes (Please specify)	Books lots of published books . I did a degree in animal welfare and behaviour, a module in nutrition how bakers is fine to feed your dog ! How any pet food made to regulations is fine and how it's all a myth that cheaper foods are bad ! LOL	1-2 hours per day	Female	18-30
1			Selected		1	Yes			Friend/family member				My veterinarian		Book, magazine or other printed source written by a veterinarian other than your own	Consult with a nutritionist or veterinarian							Very much	Very much	Beneficial	Beneficial	Beneficial	Beneficial	Agree Strongly	Agree Strongly	Agree Strongly	Agree Strongly	Agree Somewhat	Agree Somewhat	Agree Strongly	Agree Strongly	Familiar With Association of American Feed Control Officials Publications		Familiar With National Research Council: Nutrient Requirements for Dogs and Cats		Familiar With Small Animal Clinical Nutrition, or similar texts for professionals		Familiar With Professional websites		Yes (Please specify)	Vitasearch.com, pubmed	More than 2 hours per day	Male	61 or older
1		Selected		1		Yes		Internet															Very much	Somewhat	Beneficial	Beneficial	Beneficial	Beneficial	Agree Somewhat	Agree Somewhat	Agree Strongly	Agree Strongly	Agree Somewhat	Agree Somewhat	Don't Know	Agree Strongly											More than 2 hours per day	Female	18-30
1		Selected		4		Yes	Breeder instructions or advice	Internet	Friend/family member	Magazine					Book, magazine or other printed source written by a veterinarian other than your own								Very much	Very much	Beneficial	Beneficial	Beneficial	Beneficial	Disagree Somewhat	Agree Somewhat	Agree Strongly	Agree Strongly	Disagree Somewhat	Disagree Strongly	Agree Strongly	Agree Strongly		Consulted Association of American Feed Control Officials Publications		Consulted National Research Council: Nutrient Requirements for Dogs and Cats		Consulted Small Animal Clinical Nutrition, or similar texts for professionals		Consulted Professional websites	Yes (Please specify)	Applied Veterinary Clinical Nutrition	More than 2 hours per day	Female	41-50
1		Selected		2		Yes			Friend/family member								Used a published reference source	Used information from an online resource	Friend/family member				A little	Not very much	Harmful	Beneficial	Beneficial	Unnecessary	Agree Somewhat	Agree Somewhat	Agree Strongly	Agree Strongly	Disagree Strongly		Agree Strongly	Agree Strongly	Familiar With Association of American Feed Control Officials Publications	Consulted Association of American Feed Control Officials Publications	Familiar With National Research Council: Nutrient Requirements for Dogs and Cats				Familiar With Professional websites	Consulted Professional websites	No		1-2 hours per day	Female	61 or older
1		Selected	Selected	1	1	Yes			Friend/family member				My veterinarian										Very much	Very much	Beneficial	Beneficial	Beneficial	Beneficial	Disagree Somewhat	Agree Strongly	Agree Strongly	Agree Strongly	Disagree Somewhat	Disagree Strongly	Agree Strongly	Agree Somewhat			Familiar With National Research Council: Nutrient Requirements for Dogs and Cats				Familiar With Professional websites	Consulted Professional websites	No		More than 2 hours per day	Female	18-30
1		Selected	Selected	5	1	Yes		Internet									Used a published reference source	Used information from an online resource					A little	Not very much	Unnecessary	Beneficial	Beneficial	Beneficial	Don't Know	Don't Know	Agree Strongly	Agree Somewhat	Don't Know	Agree Strongly	Agree Strongly	Agree Strongly									Yes (Please specify)	Catinfo.org	More than 2 hours per day	Female	18-30
1			Selected		1	Yes		Internet		Magazine													Somewhat	A little	Beneficial	Unnecessary	Beneficial	Beneficial	Agree Somewhat	Disagree Somewhat	Agree Somewhat	Agree Somewhat	Disagree Somewhat	Agree Somewhat	Agree Strongly	Agree Somewhat							Familiar With Professional websites		No		1-2 hours per day	Male	51-60
1			Selected		1	Yes		Internet			Book			Email group	Book, magazine or other printed source written by a veterinarian other than your own		Used a published reference source	Used information from an online resource					Very much	Not very much	Beneficial	Unnecessary	Beneficial	Beneficial	Agree Somewhat	Agree Strongly	Agree Strongly	Agree Strongly	Agree Somewhat	Agree Strongly	Agree Strongly	Agree Strongly	Familiar With Association of American Feed Control Officials Publications		Familiar With National Research Council: Nutrient Requirements for Dogs and Cats		Familiar With Small Animal Clinical Nutrition, or similar texts for professionals		Familiar With Professional websites		Yes (Please specify)	Tom Lonsdale Raw Meaty Bones Promote Health	Less than one hour per day	Female	31-40
1		Selected	Selected	5	1	Yes		Internet	Friend/family member				My veterinarian					Used information from an online resource					Very much	Not very much		Unnecessary	Unnecessary	Beneficial	Agree Somewhat	Agree Somewhat	Don't Know	Don't Know	Agree Somewhat	Agree Somewhat	Agree Strongly	Disagree Somewhat	Familiar With Association of American Feed Control Officials Publications		Familiar With National Research Council: Nutrient Requirements for Dogs and Cats		Familiar With Small Animal Clinical Nutrition, or similar texts for professionals		Familiar With Professional websites				More than 2 hours per day	Female	41-50
1		Selected		3		Yes	Breeder instructions or advice						My veterinarian			Consult with a nutritionist or veterinarian	Used a published reference source			Breeder			Somewhat	Somewhat	Unnecessary	Beneficial	Beneficial	Beneficial	Agree Somewhat	Agree Strongly	Agree Strongly	Agree Strongly	Agree Somewhat	Agree Somewhat	Agree Strongly	Don't Know	Familiar With Association of American Feed Control Officials Publications		Familiar With National Research Council: Nutrient Requirements for Dogs and Cats		Familiar With Small Animal Clinical Nutrition, or similar texts for professionals		Familiar With Professional websites		Yes (Please specify)	veterinarian	More than 2 hours per day	Female	41-50
1			Selected		2	Yes		Internet							Book, magazine or other printed source written by a veterinarian other than your own	Consult with a nutritionist or veterinarian							Somewhat	Somewhat	Unnecessary	Beneficial	Beneficial	Beneficial	Agree Strongly	Agree Strongly	Agree Strongly	Agree Strongly	Disagree Somewhat	Agree Strongly	Agree Strongly	Agree Strongly	Familiar With Association of American Feed Control Officials Publications		Familiar With National Research Council: Nutrient Requirements for Dogs and Cats		Familiar With Small Animal Clinical Nutrition, or similar texts for professionals		Familiar With Professional websites		Yes (Please specify)	http://www.cachorroverde.com.br/	More than 2 hours per day	Female	31-40
1			Selected		2	Yes		Internet										Used information from an online resource		Breeder			Somewhat	Not very much	Unnecessary	Unnecessary	Beneficial	Beneficial	Agree Somewhat	Agree Somewhat	Agree Strongly	Agree Somewhat	Disagree Strongly	Agree Somewhat	Agree Strongly	Agree Strongly				Consulted National Research Council: Nutrient Requirements for Dogs and Cats				Consulted Professional websites	No		More than 2 hours per day	Female	31-40
1		Selected	Selected	1	2	Yes			Friend/family member														Very much	Very much	Beneficial	Beneficial	Beneficial	Beneficial	Disagree Strongly	Agree Strongly	Agree Strongly	Agree Strongly	Agree Strongly	Don't Know	Agree Strongly	Agree Strongly					Familiar With Small Animal Clinical Nutrition, or similar texts for professionals		Familiar With Professional websites		No		1-2 hours per day	Female	41-50
1			Selected		4	Yes	Breeder instructions or advice	Internet	Friend/family member					Email group			Used a published reference source	Used information from an online resource		Breeder			Somewhat	Somewhat	Beneficial	Beneficial	Beneficial	Beneficial	Agree Strongly	Agree Strongly	Agree Strongly	Agree Strongly	Agree Somewhat	Agree Strongly	Agree Strongly	Don't Know	Familiar With Association of American Feed Control Officials Publications		Familiar With National Research Council: Nutrient Requirements for Dogs and Cats		Familiar With Small Animal Clinical Nutrition, or similar texts for professionals		Familiar With Professional websites		No		Less than one hour per day	Female	41-50
1			Selected		5	Yes	Breeder instructions or advice	Internet			Book		My veterinarian	Email group	Book, magazine or other printed source written by a veterinarian other than your own	Consult with a nutritionist or veterinarian		Used information from an online resource		Breeder			Somewhat	Somewhat	Unnecessary	Beneficial	Beneficial	Beneficial	Agree Strongly	Agree Strongly	Agree Strongly	Agree Strongly	Agree Somewhat	Agree Somewhat	Agree Strongly	Agree Strongly					Familiar With Small Animal Clinical Nutrition, or similar texts for professionals		Familiar With Professional websites		No		More than 2 hours per day	Female	41-50
1		Selected	Selected	3	1	Yes		Internet									Used a published reference source	Used information from an online resource		Breeder		Decided proportions and composition based on availability	Very much	Not very much	Unnecessary	Beneficial	Beneficial	Unnecessary	Agree Somewhat	Agree Somewhat	Agree Strongly	Agree Strongly	Agree Somewhat	Agree Strongly	Agree Strongly	Agree Strongly	Familiar With Association of American Feed Control Officials Publications			Consulted National Research Council: Nutrient Requirements for Dogs and Cats		Consulted Small Animal Clinical Nutrition, or similar texts for professionals		Consulted Professional websites	Yes (Please specify)	Euro guidelines	1-2 hours per day	Female	41-50
1		Selected	Selected	2	1	Yes	Breeder instructions or advice	Internet															Very much	Very much	Beneficial	Beneficial	Beneficial	Beneficial	Disagree Somewhat	Agree Somewhat	Agree Strongly	Agree Strongly	Disagree Somewhat	Disagree Somewhat	Agree Strongly	Agree Strongly	Familiar With Association of American Feed Control Officials Publications	Consulted Association of American Feed Control Officials Publications	Familiar With National Research Council: Nutrient Requirements for Dogs and Cats	Consulted National Research Council: Nutrient Requirements for Dogs and Cats	Familiar With Small Animal Clinical Nutrition, or similar texts for professionals	Consulted Small Animal Clinical Nutrition, or similar texts for professionals	Familiar With Professional websites	Consulted Professional websites			More than 2 hours per day	Female	31-40
1		Selected		2		Yes		Internet	Friend/family member								Used a published reference source	Used information from an online resource			Pet store personnel		Very much	Not very much	Unnecessary	Unnecessary	Beneficial	Beneficial	Agree Somewhat	Agree Strongly	Agree Strongly	Agree Strongly	Agree Somewhat	Agree Strongly	Agree Strongly	Agree Somewhat			Familiar With National Research Council: Nutrient Requirements for Dogs and Cats						No		1-2 hours per day	Female	18-30
1		Selected	Selected	2	2	Yes	Breeder instructions or advice	Internet	Friend/family member									Used information from an online resource	Friend/family member	Breeder			Very much	Not very much	Beneficial	Unnecessary	Beneficial	Beneficial	Agree Somewhat	Agree Somewhat	Agree Strongly	Agree Strongly	Disagree Somewhat	Agree Strongly	Agree Strongly	Agree Strongly							Familiar With Professional websites		No		Less than one hour per day	Female	18-30
1			Selected		1	Yes	Breeder instructions or advice																Very much	Very much	Beneficial	Beneficial	Beneficial	Beneficial	Disagree Strongly	Disagree Strongly	Agree Strongly	Agree Somewhat	Disagree Somewhat	Disagree Somewhat	Agree Somewhat	Disagree Somewhat									No		1-2 hours per day	Female	18-30
1			Selected		5	Yes	Breeder instructions or advice			Magazine	Book			Email group	Book, magazine or other printed source written by a veterinarian other than your own		Used a published reference source	Used information from an online resource		Breeder			A little	Not very much	Beneficial	Unnecessary	Beneficial	Beneficial	Agree Strongly	Agree Strongly	Agree Strongly	Agree Strongly	Disagree Somewhat	Agree Somewhat	Agree Strongly	Agree Strongly	Familiar With Association of American Feed Control Officials Publications		Familiar With National Research Council: Nutrient Requirements for Dogs and Cats				Familiar With Professional websites		Yes (Please specify)	Dr Jean Dodds, Dr. Ian Billingsworth, Whole Dog Journal Publication	1-2 hours per day	Female	61 or older
1		Selected	Selected	1	3	Yes						Pet store employee					Used a published reference source						Somewhat	Not very much	Unnecessary	Unnecessary	Beneficial	Beneficial	Agree Somewhat	Agree Strongly	Agree Strongly	Agree Strongly	Agree Somewhat	Agree Somewhat	Agree Strongly	Agree Strongly	Familiar With Association of American Feed Control Officials Publications		Familiar With National Research Council: Nutrient Requirements for Dogs and Cats	Consulted National Research Council: Nutrient Requirements for Dogs and Cats	Familiar With Small Animal Clinical Nutrition, or similar texts for professionals		Familiar With Professional websites	Consulted Professional websites			More than 2 hours per day	Female	41-50
1		Selected	Selected	2	1	No																	Very much	Very much	Unnecessary	Beneficial	Beneficial	Beneficial																	No		More than 2 hours per day	Female	51-60
1		Selected		5		Yes				Magazine	Book		My veterinarian		Book, magazine or other printed source written by a veterinarian other than your own	Consult with a nutritionist or veterinarian	Used a published reference source						Very much	Somewhat	Unnecessary	Beneficial	Beneficial	Beneficial	Agree Strongly	Agree Strongly	Agree Strongly	Agree Strongly	Agree Strongly	Agree Strongly	Agree Strongly	Agree Strongly	Familiar With Association of American Feed Control Officials Publications		Familiar With National Research Council: Nutrient Requirements for Dogs and Cats		Familiar With Small Animal Clinical Nutrition, or similar texts for professionals		Familiar With Professional websites		Yes (Please specify)	petdiets.com. balanceIT.com, Monicasegal.com. Ihor Basko, Susan Wynn, etc etc	1-2 hours per day	Female	51-60
1		Selected	Selected	1	3	Yes		Internet	Friend/family member			Pet store employee			Book, magazine or other printed source written by a veterinarian other than your own			Used information from an online resource			Pet store personnel		Somewhat	Not very much	Unnecessary	Unnecessary	Unnecessary	Beneficial	Agree Strongly	Agree Strongly	Agree Strongly	Agree Strongly	Agree Somewhat	Agree Strongly	Agree Strongly	Agree Strongly	Familiar With Association of American Feed Control Officials Publications	Consulted Association of American Feed Control Officials Publications					Familiar With Professional websites	Consulted Professional websites			More than 2 hours per day	Female	18-30
1			Selected		1	Yes	Breeder instructions or advice	Internet	Friend/family member					Email group				Used information from an online resource	Friend/family member	Breeder			Very much	Somewhat	Unnecessary	Beneficial	Beneficial	Beneficial	Disagree Strongly	Agree Strongly	Agree Strongly	Agree Strongly	Disagree Somewhat	Agree Somewhat	Agree Strongly	Agree Somewhat									No		More than 2 hours per day	Female	31-40
1			Selected		4	Yes		Internet	Friend/family member								Used a published reference source	Used information from an online resource	Friend/family member				Very much	Not very much	Unnecessary	Beneficial	Beneficial	Unnecessary	Disagree Somewhat	Agree Somewhat	Agree Strongly	Agree Strongly	Disagree Somewhat	Agree Somewhat	Agree Strongly	Agree Somewhat	Familiar With Association of American Feed Control Officials Publications		Familiar With National Research Council: Nutrient Requirements for Dogs and Cats		Familiar With Small Animal Clinical Nutrition, or similar texts for professionals			Consulted Professional websites	No		More than 2 hours per day	Female	41-50
1			Selected		1	No																	Somewhat	Somewhat	Beneficial	Beneficial	Beneficial	Beneficial	Agree Strongly	Agree Strongly	Agree Strongly	Agree Strongly	Disagree Somewhat	Disagree Somewhat	Don't Know	Don't Know	Familiar With Association of American Feed Control Officials Publications		Familiar With National Research Council: Nutrient Requirements for Dogs and Cats		Familiar With Small Animal Clinical Nutrition, or similar texts for professionals		Familiar With Professional websites		No		More than 2 hours per day	Male	18-30
1		Selected		1		Yes		Internet	Friend/family member														Very much	Very much	Beneficial	Beneficial	Beneficial	Beneficial	Disagree Strongly	Disagree Somewhat	Agree Somewhat	Agree Somewhat	Disagree Somewhat	Agree Strongly	Don't Know	Agree Somewhat									No		More than 2 hours per day	Female	31-40
1		Selected		2		Yes		Internet	Friend/family member														Very much	Somewhat	Beneficial	Unnecessary	Beneficial	Beneficial	Agree Somewhat	Agree Somewhat	Disagree Somewhat	Agree Somewhat	Disagree Somewhat	Agree Somewhat	Agree Somewhat	Agree Somewhat									No		More than 2 hours per day	Female	41-50
1		Selected	Selected	2	1	Yes		Internet									Used a published reference source	Used information from an online resource			Pet store personnel		Somewhat	A little	Beneficial	Beneficial	Beneficial	Beneficial	Agree Strongly	Agree Strongly	Agree Strongly	Agree Strongly	Agree Somewhat	Agree Strongly	Agree Strongly	Agree Strongly						Consulted Small Animal Clinical Nutrition, or similar texts for professionals		Consulted Professional websites	No		More than 2 hours per day	Female	31-40
1		Selected		1		Yes					Book							Used information from an online resource					Somewhat	Not very much		Harmful	Unnecessary	Unnecessary	Agree Strongly	Agree Strongly	Agree Strongly	Agree Strongly	Agree Strongly	Agree Strongly	Agree Strongly	Agree Strongly	Familiar With Association of American Feed Control Officials Publications		Familiar With National Research Council: Nutrient Requirements for Dogs and Cats		Familiar With Small Animal Clinical Nutrition, or similar texts for professionals		Familiar With Professional websites		Yes (Please specify)	Holistic nutrition veterinary websites	More than 2 hours per day	Female	51-60
1		Selected	Selected	1	4	Yes	Breeder instructions or advice	Internet			Book			Email group									Somewhat	A little	Beneficial	Beneficial	Beneficial	Beneficial	Agree Somewhat	Agree Somewhat	Agree Strongly	Agree Strongly	Disagree Strongly	Disagree Strongly	Agree Strongly	Agree Somewhat	Familiar With Association of American Feed Control Officials Publications		Familiar With National Research Council: Nutrient Requirements for Dogs and Cats	Consulted National Research Council: Nutrient Requirements for Dogs and Cats	Familiar With Small Animal Clinical Nutrition, or similar texts for professionals	Consulted Small Animal Clinical Nutrition, or similar texts for professionals	Familiar With Professional websites		No		More than 2 hours per day	Female	18-30
1		Selected	Selected	2	2	Yes			Friend/family member														Very much	Somewhat	Beneficial	Beneficial	Beneficial	Beneficial	Agree Somewhat	Agree Strongly	Disagree Somewhat	Agree Strongly	Don't Know	Don't Know	Agree Strongly	Agree Strongly									No		More than 2 hours per day	Female	31-40
1		Selected	Selected	4	1	Yes		Internet	Friend/family member				My veterinarian			Consult with a nutritionist or veterinarian		Used information from an online resource	Friend/family member				Not very much	Not very much	Harmful	Beneficial	Unnecessary	Unnecessary	Agree Somewhat	Disagree Somewhat	Agree Strongly	Disagree Somewhat	Disagree Somewhat	Agree Somewhat	Agree Strongly	Agree Strongly									Yes (Please specify)	Cachorro verde	More than 2 hours per day	Female	31-40
1		Selected	Selected	2	1	Yes			Friend/family member														Somewhat	Somewhat	Beneficial	Beneficial	Beneficial	Beneficial	Agree Strongly	Agree Strongly	Agree Somewhat	Agree Somewhat	Agree Somewhat	Agree Strongly	Agree Strongly	Agree Somewhat	Familiar With Association of American Feed Control Officials Publications		Familiar With National Research Council: Nutrient Requirements for Dogs and Cats		Familiar With Small Animal Clinical Nutrition, or similar texts for professionals			Consulted Professional websites	No		More than 2 hours per day	Female	41-50
1			Selected		2	Yes		Internet	Friend/family member									Used information from an online resource	Friend/family member				Somewhat	Not very much	Beneficial	Unnecessary	Beneficial	Beneficial	Disagree Somewhat	Disagree Somewhat	Agree Strongly	Agree Somewhat	Agree Somewhat	Agree Strongly	Agree Strongly	Agree Strongly											More than 2 hours per day	Female	18-30
1		Selected		2		Yes	Breeder instructions or advice	Internet							Book, magazine or other printed source written by a veterinarian other than your own		Used a published reference source	Used information from an online resource		Breeder			Very much	A little	Unnecessary	Beneficial	Beneficial	Beneficial	Agree Strongly	Agree Strongly	Agree Strongly	Agree Strongly	Disagree Strongly	Disagree Somewhat	Agree Strongly	Agree Strongly	Familiar With Association of American Feed Control Officials Publications			Consulted National Research Council: Nutrient Requirements for Dogs and Cats				Consulted Professional websites	Yes (Please specify)	Book - Your Cat by Elizabeth Hodgekins, DVM; Website - CatInfo.Org; Feline Nutrition Foundation; several other veterinarian websites	More than 2 hours per day	Female	51-60
1		Selected	Selected	2	10	Yes							My veterinarian		Book, magazine or other printed source written by a veterinarian other than your own		Used a published reference source						Somewhat	A little	Beneficial	Beneficial	Beneficial	Beneficial	Agree Strongly	Agree Strongly	Agree Strongly	Agree Strongly		Agree Somewhat	Agree Strongly	Agree Strongly		Consulted Association of American Feed Control Officials Publications		Consulted National Research Council: Nutrient Requirements for Dogs and Cats		Consulted Small Animal Clinical Nutrition, or similar texts for professionals		Consulted Professional websites	Yes (Please specify)	Published peer reviewed studies/papers regarding dog nutrition/supplements, source animals, Etc	More than 2 hours per day	Female	41-50
1		Selected		3		Yes	Breeder instructions or advice	Internet										Used information from an online resource	Friend/family member	Breeder			Somewhat	Not very much	Beneficial	Beneficial	Beneficial	Beneficial	Agree Strongly	Disagree Somewhat	Agree Strongly	Agree Somewhat	Don't Know	Agree Strongly	Agree Strongly	Don't Know									Yes (Please specify)	Raw feeding groups	1-2 hours per day	Female	18-30
1			Selected		2	Yes		Internet			Book												Somewhat	A little	Beneficial	Beneficial	Beneficial	Beneficial	Agree Somewhat	Agree Strongly	Agree Strongly	Agree Strongly	Agree Somewhat	Agree Somewhat	Agree Somewhat	Agree Somewhat	Familiar With Association of American Feed Control Officials Publications	Consulted Association of American Feed Control Officials Publications	Familiar With National Research Council: Nutrient Requirements for Dogs and Cats	Consulted National Research Council: Nutrient Requirements for Dogs and Cats	Familiar With Small Animal Clinical Nutrition, or similar texts for professionals	Consulted Small Animal Clinical Nutrition, or similar texts for professionals	Familiar With Professional websites	Consulted Professional websites	No		1-2 hours per day	Female	18-30
1		Selected		2		Yes							My veterinarian				Used a published reference source	Used information from an online resource					Somewhat	Not very much	Harmful	Beneficial	Unnecessary	Unnecessary	Agree Strongly	Agree Strongly	Agree Strongly	Agree Strongly	Agree Somewhat	Disagree Strongly	Agree Strongly	Agree Strongly	Familiar With Association of American Feed Control Officials Publications	Consulted Association of American Feed Control Officials Publications	Familiar With National Research Council: Nutrient Requirements for Dogs and Cats	Consulted National Research Council: Nutrient Requirements for Dogs and Cats	Familiar With Small Animal Clinical Nutrition, or similar texts for professionals	Consulted Small Animal Clinical Nutrition, or similar texts for professionals	Familiar With Professional websites	Consulted Professional websites	Yes (Please specify)	VIN, AAVN	More than 2 hours per day	Female	61 or older
1			Selected		5	Yes		Internet		Magazine	Book				Book, magazine or other printed source written by a veterinarian other than your own							Decided proportions and composition based on availability	A little	A little	Beneficial	Beneficial	Beneficial	Unnecessary	Disagree Somewhat	Agree Somewhat	Agree Strongly	Agree Strongly	Disagree Somewhat	Disagree Somewhat	Agree Strongly	Agree Strongly									No		More than 2 hours per day	Female	51-60
1			Selected		2	Yes	Breeder instructions or advice	Internet	Friend/family member			Pet store employee	My veterinarian										Very much	Very much	Beneficial	Beneficial	Beneficial	Beneficial	Agree Somewhat	Disagree Somewhat	Agree Strongly	Agree Strongly	Agree Strongly	Disagree Strongly	Agree Strongly	Don't Know			Familiar With National Research Council: Nutrient Requirements for Dogs and Cats		Familiar With Small Animal Clinical Nutrition, or similar texts for professionals		Familiar With Professional websites		Yes (Please specify)	AAFCO feeding standards	More than 2 hours per day	Female	18-30
1			Selected		2	Yes	Breeder instructions or advice	Internet	Friend/family member					Email group				Used information from an online resource	Friend/family member			Decided proportions and composition based on availability	Somewhat	A little	Unnecessary	Unnecessary	Beneficial	Beneficial	Agree Strongly	Agree Strongly	Agree Strongly	Agree Strongly	Agree Somewhat	Agree Somewhat	Agree Strongly	Agree Strongly	Familiar With Association of American Feed Control Officials Publications				Familiar With Small Animal Clinical Nutrition, or similar texts for professionals		Familiar With Professional websites		Yes (Please specify)	Breed specific groups and blogs, online veterinary sites	More than 2 hours per day	Female	61 or older
1		Selected	Selected	1	1	Yes		Internet										Used information from an online resource					Very much	Not very much	Beneficial	Unnecessary	Unnecessary	Beneficial	Agree Somewhat	Agree Somewhat	Agree Strongly	Agree Strongly	Agree Somewhat	Agree Somewhat	Agree Strongly	Agree Strongly									No		More than 2 hours per day	Male	31-40
1		Selected	Selected	2	2	Yes		Internet		Magazine	Book	Pet store employee					Used a published reference source				Pet store personnel		Somewhat	Not very much	Unnecessary	Harmful	Unnecessary	Unnecessary	Agree Strongly	Agree Strongly	Agree Strongly	Agree Strongly	Agree Strongly	Agree Strongly	Agree Strongly	Agree Strongly									No		More than 2 hours per day	Female	51-60
1			Selected		2	Yes							My veterinarian										Very much	Very much	Beneficial	Beneficial	Beneficial	Beneficial	Disagree Strongly	Disagree Somewhat	Agree Somewhat	Agree Somewhat	Agree Somewhat	Disagree Somewhat	Agree Strongly	Agree Strongly	Familiar With Association of American Feed Control Officials Publications		Familiar With National Research Council: Nutrient Requirements for Dogs and Cats		Familiar With Small Animal Clinical Nutrition, or similar texts for professionals		Familiar With Professional websites				More than 2 hours per day	Female	18-30
1			Selected		1	Yes		Internet	Friend/family member									Used information from an online resource					Very much	Somewhat	Beneficial	Beneficial	Beneficial	Beneficial	Agree Somewhat	Agree Strongly	Agree Strongly	Agree Strongly	Disagree Somewhat	Agree Strongly	Agree Strongly	Agree Strongly			Familiar With National Research Council: Nutrient Requirements for Dogs and Cats								1-2 hours per day	Female	61 or older
1			Selected		1	Yes	Breeder instructions or advice													Breeder			Very much	Somewhat	Beneficial	Beneficial	Beneficial	Beneficial	Agree Somewhat	Agree Somewhat	Agree Somewhat	Agree Somewhat	Agree Somewhat	Agree Somewhat	Agree Somewhat	Agree Somewhat									No		More than 2 hours per day	Female	51-60
1			Selected		1	Yes		Internet										Used information from an online resource				Decided proportions and composition based on availability	Somewhat	A little	Beneficial	Harmful	Harmful	Beneficial	Agree Strongly	Agree Strongly	Agree Somewhat	Agree Somewhat	Disagree Somewhat	Agree Somewhat	Agree Strongly	Agree Strongly	Familiar With Association of American Feed Control Officials Publications		Familiar With National Research Council: Nutrient Requirements for Dogs and Cats				Familiar With Professional websites		Yes (Please specify)	the Possible Canine, Mercola Pets, Dogs Naturally, k9 nutrition	More than 2 hours per day	Female	18-30
1			Selected		2	Yes		Internet															Very much	Somewhat	Beneficial	Beneficial	Beneficial	Unnecessary	Agree Somewhat	Agree Strongly	Agree Somewhat	Agree Strongly	Disagree Somewhat	Disagree Somewhat	Agree Strongly	Agree Strongly							Familiar With Professional websites		No		More than 2 hours per day	Female	41-50
1			Selected		4	Yes	Breeder instructions or advice	Internet			Book				Book, magazine or other printed source written by a veterinarian other than your own	Consult with a nutritionist or veterinarian	Used a published reference source	Used information from an online resource					Somewhat	Somewhat	Harmful	Harmful	Harmful	Beneficial	Agree Somewhat	Agree Somewhat	Agree Strongly	Disagree Somewhat	Disagree Somewhat	Agree Somewhat	Agree Somewhat	Agree Strongly							Familiar With Professional websites	Consulted Professional websites			More than 2 hours per day	Female	41-50
1			Selected		6	Yes			Friend/family member		Book						Used a published reference source		Friend/family member				Somewhat	Not very much	Beneficial	Unnecessary	Beneficial	Beneficial	Disagree Somewhat	Agree Strongly	Agree Strongly	Agree Strongly	Disagree Strongly	Disagree Strongly	Agree Strongly	Agree Strongly	Familiar With Association of American Feed Control Officials Publications			Consulted National Research Council: Nutrient Requirements for Dogs and Cats		Consulted Small Animal Clinical Nutrition, or similar texts for professionals		Consulted Professional websites	No		1-2 hours per day	Female	51-60
1		Selected	Selected	5	2	Yes							My veterinarian			Consult with a nutritionist or veterinarian							Somewhat	Not very much	Beneficial	Harmful	Beneficial	Beneficial	Agree Strongly	Agree Strongly	Agree Strongly	Agree Strongly	Disagree Somewhat	Disagree Somewhat	Agree Strongly	Agree Strongly	Familiar With Association of American Feed Control Officials Publications		Familiar With National Research Council: Nutrient Requirements for Dogs and Cats		Familiar With Small Animal Clinical Nutrition, or similar texts for professionals				Yes (Please specify)	My vet, who is a member of AHVMA and knows a lot about nutrition, Other vets are not knowledgable!	Less than one hour per day	Female	41-50
1			Selected		1	Yes		Internet									Used a published reference source	Used information from an online resource					Very much	Very much	Beneficial	Beneficial	Beneficial	Beneficial	Agree Strongly	Agree Somewhat	Agree Strongly	Agree Somewhat	Disagree Strongly	Agree Strongly	Agree Strongly	Agree Strongly			Familiar With National Research Council: Nutrient Requirements for Dogs and Cats								1-2 hours per day	Female	18-30
1			Selected		2	Yes				Magazine							Used a published reference source						Somewhat	A little	Unnecessary	Harmful	Beneficial	Beneficial	Agree Strongly	Agree Strongly	Agree Strongly	Agree Strongly	Agree Strongly	Agree Strongly	Agree Strongly	Agree Strongly	Familiar With Association of American Feed Control Officials Publications		Familiar With National Research Council: Nutrient Requirements for Dogs and Cats		Familiar With Small Animal Clinical Nutrition, or similar texts for professionals		Familiar With Professional websites		No		1-2 hours per day	Female	61 or older
1			Selected		1	No																	Very much	Very much	Beneficial	Beneficial	Beneficial	Beneficial	Agree Somewhat	Disagree Somewhat	Disagree Somewhat	Agree Strongly	Disagree Somewhat	Don't Know	Agree Strongly	Agree Strongly											More than 2 hours per day	Female	18-30
1			Selected		1	Yes			Friend/family member														Very much	Very much	Beneficial	Beneficial	Beneficial	Beneficial	Agree Somewhat	Agree Somewhat	Agree Strongly	Agree Strongly	Disagree Strongly	Disagree Strongly	Agree Strongly	Agree Strongly									No		1-2 hours per day	Female	18-30
1		Selected	Selected	1	7	Yes	Breeder instructions or advice									Consult with a nutritionist or veterinarian	Used a published reference source	Used information from an online resource		Breeder			Very much	Not very much	Beneficial	Beneficial	Beneficial	Beneficial	Agree Somewhat	Agree Somewhat	Agree Strongly	Agree Strongly	Agree Somewhat	Agree Somewhat	Agree Strongly	Agree Strongly			Familiar With National Research Council: Nutrient Requirements for Dogs and Cats		Familiar With Small Animal Clinical Nutrition, or similar texts for professionals			Consulted Professional websites	Yes (Please specify)	Dog food advisor	More than 2 hours per day	Female	41-50
1			Selected		9	Yes			Friend/family member										Friend/family member			Decided proportions and composition based on availability	Somewhat	A little	Beneficial	Beneficial	Beneficial	Beneficial	Agree Strongly	Agree Strongly	Agree Strongly	Agree Strongly	Agree Somewhat	Disagree Somewhat	Agree Strongly	Agree Somewhat	Familiar With Association of American Feed Control Officials Publications		Familiar With National Research Council: Nutrient Requirements for Dogs and Cats				Familiar With Professional websites		No		1-2 hours per day	Female	61 or older
1			Selected		2	Yes			Friend/family member	Magazine		Pet store employee											Very much	Very much	Beneficial	Beneficial	Beneficial	Beneficial	Agree Somewhat	Agree Somewhat	Agree Strongly	Agree Strongly	Disagree Somewhat	Disagree Somewhat	Agree Strongly	Agree Strongly	Familiar With Association of American Feed Control Officials Publications										1-2 hours per day	Female	41-50
1		Selected	Selected	3	3	Yes		Internet	Friend/family member														Very much	Very much	Beneficial	Beneficial	Beneficial	Beneficial	Agree Somewhat	Agree Somewhat	Agree Somewhat	Agree Somewhat	Disagree Strongly	Disagree Strongly	Agree Strongly	Don't Know									No		More than 2 hours per day	Female	31-40
1		Selected		2		Yes		Internet				Pet store employee											Very much	Very much	Beneficial	Beneficial	Beneficial	Beneficial	Disagree Somewhat	Agree Somewhat	Agree Strongly	Agree Strongly	Disagree Strongly	Disagree Strongly	Agree Strongly	Agree Somewhat	Familiar With Association of American Feed Control Officials Publications	Consulted Association of American Feed Control Officials Publications	Familiar With National Research Council: Nutrient Requirements for Dogs and Cats	Consulted National Research Council: Nutrient Requirements for Dogs and Cats	Familiar With Small Animal Clinical Nutrition, or similar texts for professionals	Consulted Small Animal Clinical Nutrition, or similar texts for professionals	Familiar With Professional websites	Consulted Professional websites	No		1-2 hours per day	Female	41-50
1		Selected		2		Yes		Internet															Very much	Very much	Beneficial	Unnecessary	Beneficial	Beneficial	Disagree Somewhat	Disagree Somewhat	Agree Strongly	Agree Somewhat	Disagree Somewhat	Disagree Somewhat	Agree Strongly	Agree Strongly									No		More than 2 hours per day	Female	41-50
1			Selected		2	Yes		Internet										Used information from an online resource					Very much	Somewhat	Unnecessary	Harmful	Beneficial	Beneficial	Agree Somewhat	Agree Somewhat	Agree Somewhat	Agree Somewhat	Don't Know	Agree Somewhat	Agree Strongly	Agree Strongly	Familiar With Association of American Feed Control Officials Publications				Familiar With Small Animal Clinical Nutrition, or similar texts for professionals		Familiar With Professional websites				Less than one hour per day	Female	41-50
1		Selected		2		Yes																	Somewhat	Not very much	Unnecessary	Harmful	Beneficial	Beneficial	Agree Somewhat	Disagree Somewhat	Agree Strongly	Agree Strongly	Disagree Somewhat	Agree Somewhat	Agree Strongly	Agree Strongly	Familiar With Association of American Feed Control Officials Publications	Consulted Association of American Feed Control Officials Publications	Familiar With National Research Council: Nutrient Requirements for Dogs and Cats		Familiar With Small Animal Clinical Nutrition, or similar texts for professionals	Consulted Small Animal Clinical Nutrition, or similar texts for professionals	Familiar With Professional websites	Consulted Professional websites	Yes (Please specify)	primary research papers and reviews	More than 2 hours per day	Female
1			Selected		1	No																	Very much	Very much	Beneficial	Beneficial	Beneficial	Beneficial	Agree Somewhat	Agree Somewhat	Agree Somewhat	Agree Somewhat	Agree Somewhat	Agree Somewhat	Agree Somewhat	Agree Somewhat									No		More than 2 hours per day	Female	51-60
1		Selected	Selected	2	2	Yes		Internet									Used a published reference source	Used information from an online resource				Decided proportions and composition based on availability	Somewhat	Somewhat	Beneficial	Unnecessary	Beneficial	Beneficial	Agree Strongly	Agree Strongly	Agree Strongly	Agree Strongly	Agree Strongly	Agree Strongly	Agree Strongly	Agree Strongly							Familiar With Professional websites		No		More than 2 hours per day	Female	18-30
1			Selected		2	Yes							My veterinarian			Consult with a nutritionist or veterinarian	Used a published reference source	Used information from an online resource					Very much	Somewhat	Beneficial	Beneficial	Beneficial	Beneficial	Agree Somewhat	Agree Somewhat	Agree Strongly	Agree Somewhat	Don't Know	Agree Somewhat	Agree Strongly	Agree Strongly							Familiar With Professional websites	Consulted Professional websites	Yes (Please specify)	Dr. Becker	1-2 hours per day	Female	31-40
1			Selected		2	Yes		Internet										Used information from an online resource					Very much	Somewhat	Beneficial	Harmful	Beneficial	Beneficial	Agree Somewhat	Agree Somewhat	Don't Know	Agree Somewhat	Disagree Somewhat	Agree Strongly	Don't Know	Don't Know									No		More than 2 hours per day	Female	18-30
1			Selected		1	Yes		Internet									Used a published reference source	Used information from an online resource					Somewhat	A little	Unnecessary	Beneficial	Beneficial	Beneficial	Agree Somewhat	Agree Strongly	Agree Somewhat	Agree Strongly	Disagree Somewhat	Agree Strongly	Agree Strongly	Agree Strongly							Familiar With Professional websites		No		More than 2 hours per day	Female	41-50
1		Selected		2		Yes		Internet		Magazine	Book												Not very much	Not very much	Harmful	Unnecessary	Unnecessary	Harmful	Agree Strongly	Agree Strongly	Agree Strongly	Agree Strongly	Agree Strongly	Agree Strongly	Agree Strongly										Yes (Please specify)		1-2 hours per day	Female	61 or older
1			Selected		1	Yes			Friend/family member														Somewhat	Somewhat	Beneficial	Beneficial	Beneficial	Unnecessary	Disagree Strongly	Disagree Somewhat	Agree Somewhat	Agree Somewhat	Disagree Strongly	Disagree Strongly	Agree Strongly	Agree Somewhat			Familiar With National Research Council: Nutrient Requirements for Dogs and Cats				Familiar With Professional websites				1-2 hours per day	Male	31-40
1		Selected		2		Yes		Internet															Very much	Very much	Beneficial	Unnecessary	Unnecessary	Beneficial	Agree Somewhat	Agree Strongly	Agree Strongly	Agree Strongly	Agree Strongly	Agree Strongly	Agree Strongly	Disagree Somewhat									No		More than 2 hours per day	Female	31-40
1		Selected	Selected	2	1	Yes	Breeder instructions or advice	Internet	Friend/family member		Book		My veterinarian		Book, magazine or other printed source written by a veterinarian other than your own	Consult with a nutritionist or veterinarian	Used a published reference source		Friend/family member	Breeder			Very much	Very much	Unnecessary	Beneficial	Beneficial	Beneficial	Agree Strongly	Agree Strongly	Agree Strongly	Agree Strongly	Disagree Somewhat	Disagree Somewhat	Agree Strongly	Disagree Strongly	Familiar With Association of American Feed Control Officials Publications		Familiar With National Research Council: Nutrient Requirements for Dogs and Cats			Consulted Small Animal Clinical Nutrition, or similar texts for professionals		Consulted Professional websites	Yes (Please specify)	Rawsome and holistic	1-2 hours per day	Female	51-60
1			Selected		2	Yes			Friend/family member		Book					Consult with a nutritionist or veterinarian	Used a published reference source	Used information from an online resource					Somewhat	Somewhat	Unnecessary	Unnecessary	Unnecessary	Beneficial	Agree Strongly	Agree Strongly	Agree Strongly	Agree Strongly	Agree Somewhat	Agree Somewhat	Agree Strongly	Agree Strongly				Consulted National Research Council: Nutrient Requirements for Dogs and Cats				Consulted Professional websites			More than 2 hours per day	Female	51-60
1			Selected		2	Yes		Internet										Used information from an online resource					Somewhat	Somewhat	Beneficial	Harmful	Beneficial	Beneficial	Agree Strongly	Agree Somewhat	Agree Somewhat	Agree Somewhat	Disagree Somewhat	Disagree Somewhat	Agree Strongly	Agree Strongly									No		1-2 hours per day	Female	61 or older
1			Selected		3	Yes	Breeder instructions or advice	Internet					My veterinarian			Consult with a nutritionist or veterinarian		Used information from an online resource		Breeder		Decided proportions and composition based on availability	Not very much	Not very much	Unnecessary	Harmful	Harmful	Beneficial	Agree Somewhat	Agree Somewhat	Agree Strongly	Agree Somewhat	Agree Strongly	Agree Strongly	Agree Strongly	Agree Somewhat	Familiar With Association of American Feed Control Officials Publications								Yes (Please specify)	Karen Becker, others who feed raw	1-2 hours per day	Female	18-30
1		Selected		2		Yes									Book, magazine or other printed source written by a veterinarian other than your own								Somewhat	Somewhat	Harmful	Beneficial	Beneficial	Unnecessary	Disagree Strongly	Disagree Strongly	Disagree Somewhat	Disagree Somewhat	Don't Know	Don't Know	Agree Somewhat	Disagree Somewhat									No		1-2 hours per day	Female	41-50
1			Selected		1	Yes		Internet					My veterinarian				Used a published reference source						Somewhat	Somewhat	Beneficial	Unnecessary	Unnecessary	Beneficial	Agree Strongly	Agree Strongly	Agree Strongly	Agree Strongly	Don't Know	Don't Know	Agree Strongly	Agree Strongly									Yes (Please specify)	Darwins	More than 2 hours per day	Female	51-60
1			Selected		1	No																	Very much	Very much	Beneficial	Beneficial	Beneficial	Beneficial	Disagree Somewhat	Agree Strongly	Agree Strongly	Agree Strongly	Disagree Somewhat	Disagree Somewhat	Agree Strongly	Agree Strongly							Familiar With Professional websites		No		1-2 hours per day	Female	31-40
1			Selected		3	Yes		Internet	Friend/family member	Magazine													Very much	Somewhat	Beneficial	Beneficial	Beneficial	Beneficial	Agree Strongly	Agree Somewhat	Agree Somewhat	Agree Somewhat	Agree Somewhat	Agree Somewhat	Agree Strongly	Agree Strongly	Familiar With Association of American Feed Control Officials Publications										1-2 hours per day	Female	41-50
1			Selected		3	Yes		Internet									Used a published reference source	Used information from an online resource					Very much	A little	Beneficial	Beneficial	Beneficial	Beneficial	Agree Strongly	Agree Strongly	Agree Somewhat	Agree Strongly	Agree Somewhat	Agree Somewhat	Agree Strongly	Agree Strongly			Familiar With National Research Council: Nutrient Requirements for Dogs and Cats				Familiar With Professional websites				More than 2 hours per day	Female	31-40
1		Selected	Selected	2	1	Yes		Internet	Friend/family member														Somewhat	Somewhat	Beneficial	Beneficial	Beneficial	Beneficial	Disagree Strongly	Agree Somewhat	Agree Somewhat	Agree Somewhat	Disagree Somewhat	Disagree Somewhat	Agree Somewhat	Agree Somewhat	Familiar With Association of American Feed Control Officials Publications		Familiar With National Research Council: Nutrient Requirements for Dogs and Cats		Familiar With Small Animal Clinical Nutrition, or similar texts for professionals		Familiar With Professional websites		No		More than 2 hours per day	Female	18-30
1			Selected		1	Yes			Friend/family member									Used information from an online resource	Friend/family member				Very much	Somewhat	Beneficial	Beneficial	Beneficial	Beneficial	Agree Somewhat	Agree Somewhat	Agree Somewhat	Agree Somewhat	Disagree Somewhat	Agree Somewhat	Agree Somewhat	Agree Strongly									No		More than 2 hours per day	Female	18-30
1		Selected	Selected	4	2	Yes		Internet											Friend/family member			Decided proportions and composition based on availability	Somewhat	Not very much	Unnecessary	Beneficial	Beneficial	Beneficial	Agree Somewhat	Disagree Somewhat	Agree Strongly	Agree Somewhat	Agree Somewhat	Agree Strongly	Don't Know	Don't Know									No		More than 2 hours per day	Female	18-30
1			Selected		1	Yes			Friend/family member				My veterinarian										Somewhat	Somewhat	Beneficial	Unnecessary	Unnecessary	Beneficial	Agree Strongly	Agree Strongly	Agree Strongly	Agree Strongly	Disagree Somewhat	Don't Know	Agree Strongly	Disagree Somewhat
1			Selected		2	Yes		Internet										Used information from an online resource					Very much	Not very much	Unnecessary	Unnecessary	Unnecessary	Beneficial	Agree Somewhat	Agree Somewhat	Agree Strongly	Agree Strongly	Disagree Strongly	Agree Strongly	Agree Strongly	Agree Strongly									No		More than 2 hours per day	Female	18-30
1		Selected	Selected	2	2	Yes									Book, magazine or other printed source written by a veterinarian other than your own								Very much	Very much	Beneficial	Beneficial	Beneficial	Beneficial	Disagree Somewhat	Agree Strongly	Agree Somewhat	Agree Strongly	Agree Somewhat	Agree Somewhat	Agree Strongly	Agree Strongly		Consulted Association of American Feed Control Officials Publications	Familiar With National Research Council: Nutrient Requirements for Dogs and Cats			Consulted Small Animal Clinical Nutrition, or similar texts for professionals	Familiar With Professional websites		No		1-2 hours per day	Female	41-50
1			Selected		1	No																	Very much	Very much	Beneficial	Beneficial	Beneficial	Beneficial	Agree Somewhat	Agree Somewhat	Agree Strongly	Agree Strongly	Don't Know	Don't Know	Agree Strongly	Agree Strongly									No		More than 2 hours per day	Female	31-40
1			Selected		2	Yes		Internet							Book, magazine or other printed source written by a veterinarian other than your own			Used information from an online resource				Decided proportions and composition based on availability	Very much	A little	Beneficial	Beneficial	Beneficial	Unnecessary	Disagree Somewhat	Agree Somewhat	Agree Somewhat	Agree Somewhat	Disagree Somewhat	Disagree Somewhat	Agree Somewhat	Agree Somewhat	Familiar With Association of American Feed Control Officials Publications		Familiar With National Research Council: Nutrient Requirements for Dogs and Cats		Familiar With Small Animal Clinical Nutrition, or similar texts for professionals		Familiar With Professional websites				1-2 hours per day	Female	41-50
1			Selected		4	Yes		Internet		Magazine				Email group									Very much	Somewhat	Beneficial	Beneficial	Beneficial	Beneficial	Disagree Somewhat	Agree Somewhat	Agree Strongly	Agree Strongly	Disagree Somewhat	Disagree Somewhat	Agree Strongly	Agree Somewhat	Familiar With Association of American Feed Control Officials Publications	Consulted Association of American Feed Control Officials Publications	Familiar With National Research Council: Nutrient Requirements for Dogs and Cats	Consulted National Research Council: Nutrient Requirements for Dogs and Cats			Familiar With Professional websites	Consulted Professional websites	No		1-2 hours per day	Female	61 or older
1			Selected		3	No																	Somewhat	Somewhat	Beneficial	Beneficial	Beneficial	Beneficial	Agree Somewhat	Agree Strongly	Agree Somewhat	Agree Strongly	Don't Know	Don't Know	Agree Strongly	Agree Strongly									No		More than 2 hours per day	Female	41-50
1			Selected		8	Yes		Internet										Used information from an online resource					Very much	Not very much	Harmful	Harmful	Harmful	Beneficial	Agree Somewhat	Agree Somewhat	Agree Strongly	Agree Strongly	Disagree Somewhat	Agree Strongly	Agree Strongly	Agree Strongly											More than 2 hours per day	Female	31-40
1			Selected		2	Yes			Friend/family member	Magazine						Consult with a nutritionist or veterinarian							Somewhat	Not very much		Beneficial	Unnecessary	Unnecessary	Agree Strongly	Agree Strongly	Agree Strongly	Agree Strongly	Disagree Somewhat	Disagree Somewhat	Agree Strongly	Agree Strongly			Familiar With National Research Council: Nutrient Requirements for Dogs and Cats		Familiar With Small Animal Clinical Nutrition, or similar texts for professionals		Familiar With Professional websites		No		1-2 hours per day	Female	61 or older
1			Selected		3	Yes		Internet										Used information from an online resource					Somewhat	Somewhat	Harmful	Beneficial	Beneficial	Beneficial	Agree Strongly	Agree Strongly	Agree Strongly	Agree Strongly	Agree Somewhat	Agree Strongly	Agree Strongly	Agree Strongly								Consulted Professional websites			More than 2 hours per day	Female	61 or older
1			Selected		1	Yes		Internet										Used information from an online resource					Somewhat	A little	Beneficial	Beneficial	Beneficial	Beneficial	Agree Somewhat	Disagree Somewhat	Agree Strongly	Agree Somewhat	Agree Strongly	Agree Strongly	Agree Somewhat	Agree Strongly									Yes (Please specify)	Perfectlyrawsome.com	1-2 hours per day	Female	18-30
1		Selected	Selected	4	3	Yes	Breeder instructions or advice	Internet	Friend/family member				My veterinarian			Consult with a nutritionist or veterinarian	Used a published reference source						Somewhat	Not very much	Unnecessary	Beneficial	Beneficial	Beneficial	Agree Strongly	Agree Strongly	Agree Strongly	Agree Strongly	Agree Strongly	Agree Somewhat	Agree Strongly	Agree Strongly	Familiar With Association of American Feed Control Officials Publications		Familiar With National Research Council: Nutrient Requirements for Dogs and Cats			Consulted Small Animal Clinical Nutrition, or similar texts for professionals		Consulted Professional websites	Yes (Please specify)	Dr. Pitcarin's book for recipes,	1-2 hours per day	Female	51-60
1		Selected	Selected	2	2	Yes		Internet										Used information from an online resource			Pet store personnel	Decided proportions and composition based on availability	Somewhat	A little	Beneficial	Beneficial	Beneficial	Beneficial	Agree Somewhat	Agree Somewhat	Agree Somewhat	Agree Somewhat	Agree Somewhat	Agree Somewhat	Agree Somewhat	Agree Somewhat	Familiar With Association of American Feed Control Officials Publications				Familiar With Small Animal Clinical Nutrition, or similar texts for professionals				No		More than 2 hours per day	Female	41-50
1		Selected		12		Yes	Breeder instructions or advice																Somewhat	Somewhat	Beneficial	Harmful	Beneficial	Unnecessary	Disagree Somewhat	Agree Somewhat	Agree Strongly	Agree Somewhat	Agree Somewhat	Agree Strongly	Agree Strongly	Agree Strongly							Familiar With Professional websites	Consulted Professional websites	No		More than 2 hours per day	Female	31-40
1		Selected	Selected	1	2	Yes		Internet	Friend/family member														Somewhat	A little	Beneficial	Unnecessary	Beneficial	Beneficial	Disagree Somewhat	Agree Somewhat	Agree Somewhat	Agree Somewhat	Disagree Somewhat	Agree Somewhat	Agree Strongly	Agree Somewhat			Familiar With National Research Council: Nutrient Requirements for Dogs and Cats	Consulted National Research Council: Nutrient Requirements for Dogs and Cats			Familiar With Professional websites	Consulted Professional websites	No		More than 2 hours per day	Female	41-50
1		Selected		2		Yes		Internet	Friend/family member					Email group				Used information from an online resource	Friend/family member				Somewhat	Not very much	Harmful	Harmful	Harmful	Unnecessary	Agree Strongly	Agree Strongly	Agree Strongly	Agree Strongly	Agree Strongly	Agree Strongly	Agree Strongly	Agree Strongly											More than 2 hours per day	Female	51-60
1		Selected	Selected	1	2	Yes		Internet			Book						Used a published reference source	Used information from an online resource					Very much	A little	Unnecessary	Harmful	Beneficial	Beneficial	Agree Strongly	Agree Strongly	Agree Strongly	Agree Strongly	Agree Somewhat	Agree Somewhat	Agree Strongly	Agree Strongly							Familiar With Professional websites		Yes (Please specify)	raw feeding groups online	1-2 hours per day	Female	41-50
1			Selected		4	Yes	Breeder instructions or advice	Internet	Friend/family member		Book			Email group			Used a published reference source	Used information from an online resource	Friend/family member	Breeder			Somewhat	Not very much	Unnecessary	Beneficial	Beneficial	Unnecessary	Agree Somewhat	Agree Somewhat	Agree Strongly	Agree Somewhat	Agree Strongly	Agree Strongly	Agree Strongly	Agree Strongly									No		1-2 hours per day	Female	31-40
1			Selected		1	Yes		Internet										Used information from an online resource					Somewhat	A little	Beneficial	Beneficial	Beneficial	Beneficial	Agree Somewhat	Agree Somewhat	Agree Somewhat	Agree Somewhat	Disagree Somewhat	Agree Somewhat	Agree Strongly	Agree Strongly			Familiar With National Research Council: Nutrient Requirements for Dogs and Cats		Familiar With Small Animal Clinical Nutrition, or similar texts for professionals						More than 2 hours per day	Female	31-40
1			Selected		4	Yes			Friend/family member								Used a published reference source	Used information from an online resource	Friend/family member				Very much	Not very much	Beneficial	Beneficial		Beneficial	Agree Somewhat	Agree Somewhat	Agree Strongly	Agree Somewhat	Don't Know	Disagree Somewhat	Agree Somewhat	Agree Somewhat			Familiar With National Research Council: Nutrient Requirements for Dogs and Cats				Familiar With Professional websites		No		More than 2 hours per day	Female	18-30
1			Selected		3	Yes		Internet	Friend/family member			Pet store employee					Used a published reference source	Used information from an online resource	Friend/family member		Pet store personnel		Somewhat	Not very much	Beneficial	Beneficial	Beneficial	Beneficial	Agree Strongly	Agree Somewhat	Agree Strongly	Agree Strongly	Agree Somewhat	Agree Strongly	Agree Strongly	Agree Somewhat	Familiar With Association of American Feed Control Officials Publications		Familiar With National Research Council: Nutrient Requirements for Dogs and Cats		Familiar With Small Animal Clinical Nutrition, or similar texts for professionals				No		More than 2 hours per day	Female	18-30
1			Selected		2	Yes			Friend/family member									Used information from an online resource					Very much	Somewhat	Unnecessary	Beneficial	Beneficial	Beneficial	Agree Somewhat	Agree Somewhat	Agree Strongly	Agree Somewhat	Agree Somewhat	Agree Somewhat	Agree Strongly	Agree Strongly											1-2 hours per day	Female	31-40
1		Selected	Selected		1	Yes		Internet															Very much	Very much	Beneficial	Beneficial	Beneficial	Beneficial	Agree Somewhat	Agree Somewhat	Agree Somewhat	Agree Somewhat	Agree Somewhat	Agree Somewhat	Agree Somewhat	Agree Somewhat											More than 2 hours per day	Female	31-40
1			Selected		1	Yes			Friend/family member							Consult with a nutritionist or veterinarian	Used a published reference source						Very much	Somewhat	Beneficial	Unnecessary	Unnecessary	Beneficial	Agree Strongly	Agree Strongly	Agree Strongly	Agree Strongly	Agree Strongly	Agree Strongly	Agree Strongly	Agree Strongly			Familiar With National Research Council: Nutrient Requirements for Dogs and Cats		Familiar With Small Animal Clinical Nutrition, or similar texts for professionals	Consulted Small Animal Clinical Nutrition, or similar texts for professionals	Familiar With Professional websites	Consulted Professional websites	Yes (Please specify)	Dog Food Advisor	1-2 hours per day	Female	61 or older
1		Selected		1		Yes							My veterinarian										Very much	Very much	Beneficial	Beneficial	Beneficial	Beneficial	Agree Somewhat	Agree Somewhat	Agree Strongly	Agree Somewhat	Agree Somewhat	Don't Know	Agree Somewhat	Agree Strongly	Familiar With Association of American Feed Control Officials Publications		Familiar With National Research Council: Nutrient Requirements for Dogs and Cats		Familiar With Small Animal Clinical Nutrition, or similar texts for professionals		Familiar With Professional websites		No		1-2 hours per day	Female	31-40
1			Selected		2	Yes									Book, magazine or other printed source written by a veterinarian other than your own								Very much	Very much	Beneficial	Beneficial	Beneficial		Agree Somewhat	Agree Strongly	Agree Strongly	Agree Strongly	Disagree Strongly	Disagree Strongly		Agree Strongly	Familiar With Association of American Feed Control Officials Publications		Familiar With National Research Council: Nutrient Requirements for Dogs and Cats		Familiar With Small Animal Clinical Nutrition, or similar texts for professionals		Familiar With Professional websites		Yes (Please specify)	Pond and Churchill basics of nutrition	More than 2 hours per day	Male	18-30
1		Selected	Selected	3	12	Yes	Breeder instructions or advice		Friend/family member										Friend/family member	Breeder			Somewhat	Not very much	Unnecessary	Beneficial	Beneficial	Unnecessary	Disagree Strongly	Agree Somewhat	Agree Strongly	Agree Somewhat	Don't Know	Agree Strongly	Agree Strongly	Disagree Somewhat									No		More than 2 hours per day	Female	51-60
1		Selected	Selected	1	4	Yes							My veterinarian										Very much	Somewhat	Beneficial	Beneficial	Beneficial	Beneficial	Agree Strongly	Agree Strongly	Agree Strongly	Agree Strongly	Agree Strongly	Agree Somewhat	Agree Strongly	Agree Strongly					Familiar With Small Animal Clinical Nutrition, or similar texts for professionals		Familiar With Professional websites		Yes (Please specify)	Natural pet, Whole Dog Journal	1-2 hours per day	Female	51-60
1		Selected	Selected	2	6	Yes	Breeder instructions or advice		Friend/family member		Book						Used a published reference source	Used information from an online resource	Friend/family member	Breeder			Very much	Not very much	Beneficial	Beneficial	Beneficial	Beneficial	Agree Somewhat	Agree Somewhat	Agree Strongly	Agree Strongly	Disagree Somewhat	Agree Somewhat	Agree Strongly	Don't Know	Familiar With Association of American Feed Control Officials Publications		Familiar With National Research Council: Nutrient Requirements for Dogs and Cats						No		1-2 hours per day	Female	41-50
1			Selected		3	Yes	Breeder instructions or advice		Friend/family member					Email group	Book, magazine or other printed source written by a veterinarian other than your own			Used information from an online resource	Friend/family member	Breeder			Somewhat	Not very much	Unnecessary	Beneficial	Beneficial	Beneficial	Agree Somewhat	Agree Strongly	Agree Strongly	Agree Strongly	Agree Somewhat	Agree Strongly	Agree Strongly	Agree Somewhat			Familiar With National Research Council: Nutrient Requirements for Dogs and Cats		Familiar With Small Animal Clinical Nutrition, or similar texts for professionals		Familiar With Professional websites		No		1-2 hours per day	Female	61 or older
1			Selected		2	Yes		Internet								Consult with a nutritionist or veterinarian							Somewhat	Somewhat	Beneficial	Beneficial	Beneficial	Beneficial	Agree Somewhat	Agree Somewhat	Agree Somewhat	Agree Somewhat	Disagree Somewhat	Agree Strongly	Agree Strongly	Agree Strongly	Familiar With Association of American Feed Control Officials Publications		Familiar With National Research Council: Nutrient Requirements for Dogs and Cats		Familiar With Small Animal Clinical Nutrition, or similar texts for professionals		Familiar With Professional websites		No		More than 2 hours per day	Female	18-30
1			Selected		6	Yes		Internet									Used a published reference source	Used information from an online resource				Decided proportions and composition based on availability	Somewhat	A little	Beneficial	Beneficial	Beneficial	Unnecessary	Agree Strongly	Agree Strongly	Agree Strongly	Agree Strongly	Disagree Somewhat	Agree Strongly	Agree Strongly	Agree Somewhat									No		1-2 hours per day	Female	61 or older
1			Selected		2	Yes			Friend/family member														Not very much	Not very much	Harmful	Beneficial	Beneficial	Beneficial	Don't Know	Disagree Strongly	Disagree Strongly	Disagree Strongly	Don't Know		Agree Strongly	Agree Strongly									No		Less than one hour per day	Male	61 or older
1			Selected		1	Yes	Breeder instructions or advice	Internet	Friend/family member														Somewhat	Somewhat	Beneficial	Beneficial	Beneficial	Beneficial	Disagree Strongly	Disagree Strongly	Agree Somewhat	Agree Somewhat	Don't Know	Don't Know	Agree Strongly	Disagree Somewhat									No		More than 2 hours per day	Female	61 or older
1		Selected		1		Yes				Magazine				Email group	Book, magazine or other printed source written by a veterinarian other than your own								Very much	Very much	Beneficial	Beneficial	Beneficial	Beneficial	Agree Somewhat	Agree Strongly	Agree Strongly	Agree Strongly	Disagree Strongly	Disagree Strongly	Agree Strongly	Agree Somewhat					Familiar With Small Animal Clinical Nutrition, or similar texts for professionals		Familiar With Professional websites		No		More than 2 hours per day	Female	51-60
1		Selected	Selected	4	2	Yes		Internet										Used information from an online resource					Somewhat	Somewhat	Beneficial	Beneficial	Beneficial	Beneficial	Disagree Somewhat	Disagree Somewhat	Agree Strongly	Agree Strongly	Agree Somewhat	Agree Somewhat	Agree Strongly	Agree Strongly			Familiar With National Research Council: Nutrient Requirements for Dogs and Cats	Consulted National Research Council: Nutrient Requirements for Dogs and Cats	Familiar With Small Animal Clinical Nutrition, or similar texts for professionals	Consulted Small Animal Clinical Nutrition, or similar texts for professionals	Familiar With Professional websites	Consulted Professional websites	Yes (Please specify)	Very knowledgeable people and veterinarians on specialized Facebook pages and the Feline Diabetes Message Boards who've done lots of research or are specialists themselves.	More than 2 hours per day	Female	51-60
1		Selected	Selected	1	1	Yes		Internet					My veterinarian										Very much	Very much	Beneficial	Beneficial	Beneficial	Beneficial	Disagree Somewhat	Agree Somewhat	Agree Somewhat	Agree Somewhat	Disagree Strongly	Disagree Strongly	Agree Strongly	Agree Somewhat			Familiar With National Research Council: Nutrient Requirements for Dogs and Cats		Familiar With Small Animal Clinical Nutrition, or similar texts for professionals		Familiar With Professional websites		No		More than 2 hours per day	Female	18-30
1			Selected		1	Yes			Friend/family member								Used a published reference source	Used information from an online resource	Friend/family member		Pet store personnel		Very much	A little	Beneficial	Beneficial	Beneficial	Beneficial	Agree Strongly	Agree Strongly	Agree Strongly	Agree Strongly	Agree Strongly	Agree Strongly	Agree Strongly	Agree Strongly	Familiar With Association of American Feed Control Officials Publications		Familiar With National Research Council: Nutrient Requirements for Dogs and Cats				Familiar With Professional websites		No		More than 2 hours per day	Female	31-40
1		Selected		5		Yes		Internet									Used a published reference source						Somewhat	Not very much	Unnecessary	Harmful	Beneficial	Beneficial	Agree Strongly	Agree Strongly	Agree Somewhat	Agree Somewhat	Disagree Strongly	Agree Somewhat	Agree Strongly	Agree Somewhat				Consulted National Research Council: Nutrient Requirements for Dogs and Cats					Yes (Please specify)	Dr. Pitcairn's books	More than 2 hours per day	Female	41-50
1		Selected	Selected	3	2	Yes			Friend/family member				My veterinarian			Consult with a nutritionist or veterinarian	Used a published reference source	Used information from an online resource	Friend/family member			Decided proportions and composition based on availability	Somewhat	Not very much	Beneficial	Unnecessary	Beneficial	Beneficial	Agree Strongly	Agree Strongly	Agree Strongly	Agree Somewhat	Disagree Somewhat	Agree Somewhat	Agree Strongly	Agree Strongly	Familiar With Association of American Feed Control Officials Publications	Consulted Association of American Feed Control Officials Publications	Familiar With National Research Council: Nutrient Requirements for Dogs and Cats				Familiar With Professional websites				1-2 hours per day	Female	18-30
1		Selected		2		Yes			Friend/family member									Used information from an online resource	Friend/family member				Somewhat	Somewhat	Beneficial	Beneficial	Unnecessary	Unnecessary	Disagree Strongly	Disagree Strongly	Agree Somewhat	Agree Somewhat	Agree Strongly	Agree Strongly	Agree Somewhat	Agree Strongly									Yes (Please specify)	Cat CRAP group on Facebook	More than 2 hours per day	Female	31-40
1			Selected		2	Yes			Friend/family member							Consult with a nutritionist or veterinarian							Somewhat	Not very much	Harmful	Beneficial	Harmful	Beneficial	Agree Strongly	Agree Somewhat	Agree Strongly	Agree Somewhat	Agree Somewhat	Agree Strongly	Agree Strongly	Agree Somewhat			Familiar With National Research Council: Nutrient Requirements for Dogs and Cats		Familiar With Small Animal Clinical Nutrition, or similar texts for professionals				No		More than 2 hours per day	Female	18-30
1		Selected		1		Yes		Internet	Friend/family member														Somewhat	Somewhat	Beneficial	Unnecessary	Beneficial	Beneficial	Agree Strongly	Agree Strongly	Agree Strongly	Agree Strongly	Agree Somewhat	Agree Somewhat	Agree Strongly	Agree Strongly							Familiar With Professional websites		Yes (Please specify)	Vet and pet food website.	More than 2 hours per day	Female	31-40
1			Selected		1	No																	Very much	Very much	Beneficial	Beneficial	Beneficial	Beneficial	Disagree Somewhat	Disagree Somewhat	Agree Somewhat	Agree Somewhat	Disagree Somewhat	Disagree Somewhat	Agree Strongly	Agree Strongly									No		More than 2 hours per day	Female	18-30
1		Selected		1		Yes			Friend/family member														Very much	Somewhat	Beneficial	Beneficial	Beneficial	Beneficial	Agree Somewhat	Agree Somewhat	Agree Strongly	Agree Strongly	Don't Know	Don't Know	Agree Strongly	Agree Strongly					Familiar With Small Animal Clinical Nutrition, or similar texts for professionals				No		1-2 hours per day	Female	31-40
1		Selected	Selected	9	2	Yes		Internet					My veterinarian			Consult with a nutritionist or veterinarian	Used a published reference source	Used information from an online resource					Somewhat	Somewhat	Beneficial	Beneficial	Beneficial	Beneficial	Agree Strongly	Agree Strongly	Agree Strongly	Agree Strongly	Agree Somewhat	Agree Somewhat	Agree Strongly	Agree Strongly					Familiar With Small Animal Clinical Nutrition, or similar texts for professionals	Consulted Small Animal Clinical Nutrition, or similar texts for professionals	Familiar With Professional websites	Consulted Professional websites	Yes (Please specify)	www.cachorroverde.com.br	More than 2 hours per day	Female	18-30
1		Selected	Selected	7	1	Yes			Friend/family member			Pet store employee		Email group									Very much	Somewhat	Beneficial	Beneficial	Beneficial	Beneficial	Agree Strongly	Agree Somewhat	Agree Somewhat	Agree Somewhat	Disagree Somewhat	Agree Somewhat	Agree Strongly	Agree Strongly	Familiar With Association of American Feed Control Officials Publications		Familiar With National Research Council: Nutrient Requirements for Dogs and Cats		Familiar With Small Animal Clinical Nutrition, or similar texts for professionals		Familiar With Professional websites		Yes (Please specify)	Feline Nutrition, Cat Centric, Dr Becker DVM	More than 2 hours per day	Male	51-60
1			Selected		5	Yes		Internet			Book						Used a published reference source	Used information from an online resource		Breeder			Very much	Not very much	Harmful	Beneficial	Beneficial	Beneficial	Agree Somewhat	Agree Strongly	Agree Strongly	Agree Strongly	Agree Somewhat	Agree Somewhat	Agree Strongly	Agree Strongly									Yes (Please specify)	"Give a dog a bone" Ian Billinghurst, "Raw Meaty Bones" Londsdale	1-2 hours per day	Male	31-40
1		Selected		4		Yes		Internet										Used information from an online resource					Very much	Not very much	Beneficial	Beneficial	Beneficial	Beneficial	Agree Somewhat	Agree Strongly	Agree Strongly	Agree Strongly	Disagree Somewhat	Agree Strongly	Agree Strongly	Agree Strongly									Yes (Please specify)	feline-nutrition.org, catinfo.org, catnutrition.org	More than 2 hours per day	Female	18-30
1			Selected		4	Yes		Internet				Pet store employee									Pet store personnel		Somewhat	Not very much		Harmful	Harmful	Beneficial	Agree Somewhat	Agree Strongly	Agree Strongly	Agree Strongly	Agree Strongly	Agree Strongly	Agree Strongly	Agree Strongly									Yes (Please specify)	I am in the UK so source UK advice. Facebook raw feeding groups are amazing.	More than 2 hours per day	Female	61 or older
1		Selected	Selected	3	2	Yes		Internet										Used information from an online resource					Very much	Somewhat	Beneficial	Beneficial	Beneficial	Beneficial	Agree Somewhat	Agree Somewhat	Agree Somewhat	Agree Somewhat	Agree Somewhat	Agree Somewhat	Agree Somewhat	Agree Strongly	Familiar With Association of American Feed Control Officials Publications								No		1-2 hours per day	Female	41-50
1		Selected	Selected	1	4	Yes		Internet	Friend/family member		Book		My veterinarian		Book, magazine or other printed source written by a veterinarian other than your own	Consult with a nutritionist or veterinarian		Used information from an online resource	Friend/family member			Decided proportions and composition based on availability	A little	Not very much	Harmful	Unnecessary	Unnecessary	Unnecessary	Agree Strongly	Agree Strongly	Agree Strongly	Agree Strongly	Agree Strongly	Agree Strongly	Agree Strongly	Agree Strongly									Yes (Please specify)	certified animal naturopath	Less than one hour per day	Female	41-50
1		Selected	Selected	2	4	Yes		Internet		Magazine	Book			Email group	Book, magazine or other printed source written by a veterinarian other than your own		Used a published reference source	Used information from an online resource				Decided proportions and composition based on availability	Not very much	Not very much	Harmful	Harmful	Harmful	Harmful	Agree Somewhat	Agree Strongly	Agree Strongly	Agree Strongly	Don't Know	Agree Strongly	Don't Know	Don't Know	Familiar With Association of American Feed Control Officials Publications		Familiar With National Research Council: Nutrient Requirements for Dogs and Cats			Consulted Small Animal Clinical Nutrition, or similar texts for professionals	Familiar With Professional websites		Yes (Please specify)	Many books by various holistic vets, and nutritionists who feed raw home cooked diets	1-2 hours per day	Female	31-40
1		Selected	Selected	2	2	Yes	Breeder instructions or advice	Internet			Book		My veterinarian					Used information from an online resource		Breeder		Decided proportions and composition based on availability	Somewhat	Somewhat	Beneficial	Beneficial	Beneficial	Beneficial	Disagree Somewhat	Agree Strongly	Agree Strongly	Agree Strongly	Disagree Strongly	Disagree Somewhat	Agree Strongly	Agree Somewhat								Consulted Professional websites	No		More than 2 hours per day	Male	61 or older
1		Selected		3		Yes							My veterinarian		Book, magazine or other printed source written by a veterinarian other than your own	Consult with a nutritionist or veterinarian													Agree Strongly	Agree Strongly	Agree Strongly	Agree Strongly	Agree Somewhat	Agree Somewhat	Agree Strongly	Agree Strongly			Familiar With National Research Council: Nutrient Requirements for Dogs and Cats		Familiar With Small Animal Clinical Nutrition, or similar texts for professionals	Consulted Small Animal Clinical Nutrition, or similar texts for professionals	Familiar With Professional websites	Consulted Professional websites	Yes (Please specify)	As a veterinarian, I am an informed reference	More than 2 hours per day	Female	51-60
1		Selected		3		Yes									Book, magazine or other printed source written by a veterinarian other than your own								Very much	Somewhat	Beneficial	Beneficial	Beneficial	Beneficial	Disagree Somewhat	Agree Somewhat	Agree Strongly	Agree Strongly	Agree Somewhat	Disagree Somewhat	Don't Know	Don't Know	Familiar With Association of American Feed Control Officials Publications					Consulted Small Animal Clinical Nutrition, or similar texts for professionals		Consulted Professional websites	Yes (Please specify)	Peer reviewed scientific journals	More than 2 hours per day	Female	51-60
1			Selected			Yes	Breeder instructions or advice	Internet															Somewhat	Not very much	Unnecessary	Unnecessary	Beneficial	Beneficial	Agree Strongly	Agree Strongly	Agree Strongly	Agree Strongly	Agree Somewhat	Agree Strongly	Agree Strongly	Agree Strongly							Familiar With Professional websites	Consulted Professional websites			More than 2 hours per day	Female	61 or older
1		Selected	Selected	2	6	Yes		Internet	Friend/family member								Used a published reference source						Very much	Somewhat	Beneficial	Beneficial	Beneficial	Beneficial	Agree Somewhat	Agree Strongly	Agree Somewhat	Agree Strongly	Agree Somewhat	Agree Somewhat	Agree Strongly	Agree Somewhat									No		More than 2 hours per day	Female	61 or older
1			Selected		3	Yes	Breeder instructions or advice		Friend/family member								Used a published reference source			Breeder			Somewhat	A little	Unnecessary	Beneficial	Beneficial	Beneficial	Don't Know	Agree Somewhat	Agree Strongly	Agree Somewhat	Don't Know	Agree Strongly	Agree Strongly	Agree Strongly									No		Less than one hour per day	Male	41-50
1			Selected		1	Yes			Friend/family member									Used information from an online resource					Very much	Not very much	Beneficial	Beneficial	Beneficial	Beneficial	Agree Strongly	Agree Somewhat	Agree Strongly	Agree Strongly	Disagree Strongly	Agree Somewhat	Agree Strongly	Agree Strongly									Yes (Please specify)	bnaturals.com	1-2 hours per day	Female	41-50
1			Selected		1	Yes					Book												Somewhat	Not very much	Harmful	Unnecessary	Beneficial	Beneficial	Agree Somewhat	Agree Somewhat	Agree Strongly	Agree Somewhat	Disagree Somewhat	Disagree Somewhat	Agree Strongly	Agree Somewhat							Familiar With Professional websites				Less than one hour per day	Female	61 or older
1		Selected	Selected	1	1	Yes							My veterinarian			Consult with a nutritionist or veterinarian							Somewhat	Somewhat	Unnecessary	Beneficial	Beneficial	Beneficial	Agree Strongly	Agree Strongly	Agree Strongly	Agree Strongly	Disagree Somewhat	Agree Somewhat	Don't Know	Don't Know											More than 2 hours per day	Female	51-60
1		Selected	Selected	3	1	Yes			Friend/family member														Very much	Very much	Beneficial	Beneficial	Unnecessary	Beneficial	Agree Somewhat	Agree Somewhat	Agree Somewhat	Agree Somewhat	Agree Somewhat	Agree Somewhat	Agree Strongly	Don't Know									No		More than 2 hours per day	Female	51-60
1		Selected		3		Yes		Internet						Email group	Book, magazine or other printed source written by a veterinarian other than your own								Very much	Very much	Beneficial	Unnecessary	Beneficial	Beneficial	Agree Somewhat	Agree Somewhat	Agree Strongly	Agree Strongly	Disagree Somewhat	Agree Strongly	Agree Strongly	Agree Strongly							Familiar With Professional websites		Yes (Please specify)	catinfo.org	More than 2 hours per day	Female	41-50
1			Selected		2	Yes	Breeder instructions or advice	Internet	Friend/family member	Magazine				Email group									Somewhat	Not very much	Beneficial	Beneficial	Beneficial	Beneficial	Disagree Somewhat	Disagree Somewhat	Agree Strongly	Agree Strongly	Agree Strongly	Agree Strongly	Agree Strongly	Agree Strongly							Familiar With Professional websites		No		More than 2 hours per day	Female	61 or older
1			Selected		4	Yes	Breeder instructions or advice	Internet															Very much	A little	Beneficial	Beneficial	Beneficial	Beneficial	Disagree Somewhat	Disagree Somewhat	Agree Strongly	Agree Strongly	Agree Somewhat	Agree Strongly	Agree Strongly	Don't Know	Familiar With Association of American Feed Control Officials Publications		Familiar With National Research Council: Nutrient Requirements for Dogs and Cats		Familiar With Small Animal Clinical Nutrition, or similar texts for professionals		Familiar With Professional websites		No		1-2 hours per day	Female	51-60
1		Selected	Selected	1	2	Yes		Internet			Book				Book, magazine or other printed source written by a veterinarian other than your own		Used a published reference source						Not very much	Not very much	Unnecessary	Harmful	Beneficial	Beneficial	Agree Somewhat	Agree Somewhat	Agree Somewhat	Agree Somewhat	Disagree Somewhat	Agree Somewhat	Agree Strongly	Agree Somewhat									No		1-2 hours per day	Female	61 or older
1			Selected		2	Yes						Pet store employee											Very much	Very much	Beneficial	Beneficial	Beneficial	Beneficial	Disagree Strongly	Disagree Somewhat	Agree Strongly	Agree Strongly	Disagree Somewhat	Agree Somewhat	Agree Strongly	Disagree Strongly									No		More than 2 hours per day	Male	41-50
1		Selected		5		Yes		Internet			Book			Email group	Book, magazine or other printed source written by a veterinarian other than your own			Used information from an online resource					Somewhat	Not very much	Harmful	Harmful	Unnecessary	Unnecessary	Agree Strongly	Agree Strongly	Agree Strongly	Agree Somewhat	Disagree Somewhat	Agree Somewhat	Agree Strongly	Agree Somewhat	Familiar With Association of American Feed Control Officials Publications		Familiar With National Research Council: Nutrient Requirements for Dogs and Cats	Consulted National Research Council: Nutrient Requirements for Dogs and Cats	Familiar With Small Animal Clinical Nutrition, or similar texts for professionals		Familiar With Professional websites		Yes (Please specify)	http://feline-nutrition.org	More than 2 hours per day	Female	41-50
1			Selected		4	Yes	Breeder instructions or advice	Internet						Email group									Very much	Somewhat	Beneficial	Beneficial	Beneficial	Beneficial	Agree Strongly	Agree Strongly	Agree Strongly	Agree Strongly	Agree Somewhat	Agree Somewhat	Agree Strongly	Agree Strongly			Familiar With National Research Council: Nutrient Requirements for Dogs and Cats				Familiar With Professional websites		No		1-2 hours per day	Female	51-60
1		Selected	Selected	2	2	Yes	Breeder instructions or advice	Internet			Book		My veterinarian	Email group			Used a published reference source			Breeder			Very much	A little	Unnecessary	Beneficial	Beneficial	Beneficial	Disagree Somewhat	Agree Somewhat	Agree Strongly	Agree Strongly	Disagree Somewhat	Disagree Somewhat	Agree Strongly	Agree Somewhat	Familiar With Association of American Feed Control Officials Publications				Familiar With Small Animal Clinical Nutrition, or similar texts for professionals	Consulted Small Animal Clinical Nutrition, or similar texts for professionals	Familiar With Professional websites	Consulted Professional websites			Less than one hour per day	Female	61 or older
1		Selected	Selected	1	2	Yes								Email group									Somewhat	Somewhat	Unnecessary	Beneficial	Beneficial	Beneficial	Agree Strongly	Agree Strongly	Agree Strongly	Agree Strongly	Disagree Somewhat	Disagree Somewhat	Agree Strongly	Agree Strongly			Familiar With National Research Council: Nutrient Requirements for Dogs and Cats		Familiar With Small Animal Clinical Nutrition, or similar texts for professionals		Familiar With Professional websites		No		More than 2 hours per day	Female	61 or older
1			Selected		1	Yes			Friend/family member														Very much	Very much	Beneficial	Beneficial	Beneficial	Beneficial	Disagree Strongly	Agree Strongly	Don't Know	Don't Know	Disagree Somewhat	Disagree Strongly	Don't Know	Don't Know					Familiar With Small Animal Clinical Nutrition, or similar texts for professionals	Consulted Small Animal Clinical Nutrition, or similar texts for professionals	Familiar With Professional websites	Consulted Professional websites	No		More than 2 hours per day	Female	18-30
1		Selected	Selected	2	2	Yes		Internet	Friend/family member		Book	Pet store employee					Used a published reference source					Decided proportions and composition based on availability	Somewhat	Somewhat	Beneficial	Beneficial	Beneficial	Unnecessary	Agree Somewhat	Agree Somewhat	Agree Strongly	Agree Somewhat	Disagree Somewhat	Agree Somewhat	Agree Strongly	Agree Strongly									No		1-2 hours per day	Female	51-60
1		Selected	Selected	4	15	Yes	Breeder instructions or advice	Internet								Consult with a nutritionist or veterinarian	Used a published reference source	Used information from an online resource		Breeder			Somewhat	Somewhat	Beneficial	Beneficial	Unnecessary	Beneficial	Agree Strongly	Agree Somewhat	Agree Somewhat	Agree Somewhat	Agree Somewhat	Agree Strongly	Agree Strongly	Agree Strongly		Consulted Association of American Feed Control Officials Publications		Consulted National Research Council: Nutrient Requirements for Dogs and Cats	Familiar With Small Animal Clinical Nutrition, or similar texts for professionals	Consulted Small Animal Clinical Nutrition, or similar texts for professionals	Familiar With Professional websites	Consulted Professional websites	No		More than 2 hours per day	Female	31-40
1			Selected		1	No																	Very much	Very much	Beneficial	Beneficial	Beneficial	Beneficial	Disagree Somewhat	Agree Somewhat	Agree Somewhat	Agree Somewhat	Agree Somewhat	Agree Somewhat	Agree Somewhat	Agree Somewhat									No		More than 2 hours per day	Female	31-40
1		Selected		3
1			Selected		1	Yes							My veterinarian	Email group	Book, magazine or other printed source written by a veterinarian other than your own	Consult with a nutritionist or veterinarian		Used information from an online resource				Decided proportions and composition based on availability	Not very much	A little	Harmful	Harmful	Beneficial	Beneficial	Agree Strongly	Agree Strongly	Agree Strongly	Agree Strongly	Agree Strongly	Agree Strongly	Agree Strongly	Agree Strongly					Familiar With Small Animal Clinical Nutrition, or similar texts for professionals		Familiar With Professional websites		Yes (Please specify)	colleagues/holistic conferences	1-2 hours per day	Female	41-50
1		Selected	Selected	1	4	Yes		Internet	Friend/family member		Book						Used a published reference source	Used information from an online resource			Pet store personnel		A little	Not very much	Harmful	Beneficial	Harmful	Beneficial	Agree Somewhat	Agree Somewhat	Agree Strongly	Agree Strongly	Agree Somewhat	Agree Strongly	Agree Strongly	Agree Strongly											More than 2 hours per day	Male	18-30
1			Selected		2	Yes		Internet	Friend/family member		Book			Email group			Used a published reference source	Used information from an online resource	Friend/family member				Somewhat	A little	Unnecessary	Beneficial	Beneficial	Beneficial	Agree Somewhat	Agree Somewhat	Agree Strongly	Agree Somewhat	Agree Somewhat	Agree Strongly	Agree Strongly	Agree Somewhat	Familiar With Association of American Feed Control Officials Publications		Familiar With National Research Council: Nutrient Requirements for Dogs and Cats						No		1-2 hours per day	Female	41-50
1		Selected	Selected	4	2	No																	Somewhat	Somewhat	Unnecessary	Unnecessary	Unnecessary	Unnecessary	Agree Somewhat	Agree Somewhat	Agree Somewhat	Agree Somewhat	Agree Somewhat	Agree Somewhat	Agree Somewhat	Agree Somewhat									No		1-2 hours per day		51-60
1		Selected	Selected	1	4	Yes		Internet		Magazine													Very much	Somewhat	Beneficial	Beneficial	Beneficial	Beneficial	Agree Somewhat	Agree Strongly	Agree Somewhat	Agree Strongly	Disagree Strongly	Agree Somewhat	Agree Strongly	Agree Strongly	Familiar With Association of American Feed Control Officials Publications				Familiar With Small Animal Clinical Nutrition, or similar texts for professionals		Familiar With Professional websites		No		1-2 hours per day	Female	51-60
1			Selected		2	Yes	Breeder instructions or advice	Internet															Very much	Very much	Beneficial	Unnecessary	Beneficial	Beneficial	Agree Strongly	Agree Strongly	Agree Strongly	Agree Strongly	Disagree Somewhat	Agree Somewhat	Agree Strongly	Disagree Strongly	Familiar With Association of American Feed Control Officials Publications						Familiar With Professional websites		Yes (Please specify)	Several family members are vets	1-2 hours per day	Female	41-50
1			Selected		1	Yes		Internet							Book, magazine or other printed source written by a veterinarian other than your own		Used a published reference source	Used information from an online resource					Very much	Not very much	Harmful	Harmful	Harmful	Beneficial	Agree Strongly	Agree Strongly	Agree Strongly	Agree Strongly	Agree Strongly	Agree Strongly	Agree Strongly	Agree Strongly									Yes (Please specify)	Dutch forum : Barfplaats.nl	More than 2 hours per day	Female	51-60
1			Selected		3	Yes	Breeder instructions or advice		Friend/family member						Book, magazine or other printed source written by a veterinarian other than your own	Consult with a nutritionist or veterinarian	Used a published reference source	Used information from an online resource					Very much	Somewhat	Unnecessary	Beneficial	Beneficial	Harmful	Agree Strongly	Agree Strongly	Agree Strongly	Agree Strongly	Agree Somewhat	Agree Somewhat	Agree Strongly	Agree Strongly			Familiar With National Research Council: Nutrient Requirements for Dogs and Cats	Consulted National Research Council: Nutrient Requirements for Dogs and Cats			Familiar With Professional websites	Consulted Professional websites			1-2 hours per day	Female	61 or older
1			Selected		3	Yes		Internet	Friend/family member							Consult with a nutritionist or veterinarian	Used a published reference source	Used information from an online resource	Friend/family member				Somewhat	Not very much	Unnecessary	Beneficial	Beneficial	Beneficial	Agree Strongly	Agree Strongly	Agree Strongly	Agree Strongly	Agree Strongly	Agree Strongly	Agree Strongly	Agree Strongly									Yes (Please specify)	Judy Morgan	Less than one hour per day	Female	61 or older
1			Selected		1	Yes		Internet	Friend/family member		Book						Used a published reference source	Used information from an online resource					Somewhat	A little	Beneficial	Beneficial	Beneficial	Beneficial	Disagree Somewhat	Disagree Strongly	Agree Somewhat	Disagree Strongly	Disagree Somewhat	Agree Somewhat	Agree Strongly	Agree Strongly								Consulted Professional websites	No		More than 2 hours per day	Female	51-60
1		Selected		2		No																	Very much	Very much	Beneficial	Beneficial	Beneficial	Beneficial	Disagree Strongly	Agree Strongly	Agree Strongly	Agree Strongly	Don't Know	Don't Know	Agree Strongly	Agree Strongly									No		More than 2 hours per day	Female	31-40
1		Selected		2		Yes	Breeder instructions or advice					Pet store employee						Used information from an online resource					Somewhat	A little	Unnecessary	Unnecessary	Beneficial	Beneficial	Agree Strongly	Agree Strongly	Agree Strongly	Agree Strongly	Agree Somewhat	Agree Strongly	Agree Strongly	Agree Strongly									Yes (Please specify)	Little Big Cat/Nutrition; Dr Becker's Real Food for Healthy Cats and Dogs; Facebook page for Cats Raw and Proud (CRAP)	More than 2 hours per day	Female	41-50
1			Selected		7	No																	Very much	Somewhat	Harmful	Beneficial	Beneficial	Beneficial	Agree Strongly	Agree Strongly	Agree Strongly	Agree Strongly	Agree Somewhat	Agree Strongly	Agree Strongly	Agree Strongly							Familiar With Professional websites		No		More than 2 hours per day	Female	41-50
1			Selected		4	Yes		Internet										Used information from an online resource					Somewhat	A little	Unnecessary	Unnecessary	Unnecessary	Beneficial	Agree Somewhat	Agree Somewhat	Agree Strongly	Agree Strongly	Disagree Somewhat	Agree Somewhat	Agree Strongly	Agree Somewhat									No		1-2 hours per day	Female	41-50
1		Selected				Yes				Magazine													Very much	Very much	Beneficial	Beneficial	Beneficial	Beneficial	Agree Strongly	Don't Know	Agree Somewhat	Agree Strongly		Disagree Strongly	Don't Know	Don't Know									No		Less than one hour per day	Female	61 or older
1		Selected	Selected	1	1	Yes						Pet store employee			Book, magazine or other printed source written by a veterinarian other than your own	Consult with a nutritionist or veterinarian	Used a published reference source	Used information from an online resource			Pet store personnel		Somewhat	Not very much	Beneficial	Beneficial	Beneficial	Beneficial	Agree Strongly	Agree Somewhat	Agree Strongly	Agree Strongly	Disagree Somewhat	Agree Strongly	Agree Strongly	Agree Strongly		Consulted Association of American Feed Control Officials Publications	Familiar With National Research Council: Nutrient Requirements for Dogs and Cats								1-2 hours per day	Female	18-30
1			Selected		1	No																	Somewhat	Very much	Beneficial	Beneficial	Beneficial	Beneficial	Agree Somewhat	Disagree Somewhat	Disagree Strongly	Agree Somewhat	Disagree Strongly	Don't Know	Agree Strongly	Agree Strongly									No		Less than one hour per day	Female	18-30
1			Selected		2	Yes		Internet					My veterinarian			Consult with a nutritionist or veterinarian	Used a published reference source	Used information from an online resource					Somewhat	A little	Beneficial	Unnecessary	Unnecessary	Beneficial	Agree Somewhat	Agree Somewhat	Agree Strongly	Agree Somewhat	Disagree Somewhat	Agree Somewhat	Agree Strongly	Agree Strongly	Familiar With Association of American Feed Control Officials Publications				Familiar With Small Animal Clinical Nutrition, or similar texts for professionals	Consulted Small Animal Clinical Nutrition, or similar texts for professionals	Familiar With Professional websites	Consulted Professional websites	No		1-2 hours per day	Female	18-30
1		Selected	Selected	2	2	Yes		Internet									Used a published reference source						Somewhat	Very much	Beneficial	Beneficial	Beneficial	Beneficial	Disagree Somewhat	Disagree Somewhat	Disagree Somewhat	Disagree Somewhat	Agree Somewhat	Agree Somewhat	Disagree Strongly	Disagree Strongly											1-2 hours per day	Male	31-40
1		Selected	Selected	2	7	Yes				Magazine	Book		My veterinarian									Decided proportions and composition based on availability	Very much	Somewhat	Unnecessary	Harmful	Harmful	Beneficial	Agree Somewhat	Agree Strongly	Agree Strongly	Agree Strongly	Agree Somewhat	Agree Strongly	Agree Strongly	Agree Strongly	Familiar With Association of American Feed Control Officials Publications	Consulted Association of American Feed Control Officials Publications	Familiar With National Research Council: Nutrient Requirements for Dogs and Cats	Consulted National Research Council: Nutrient Requirements for Dogs and Cats	Familiar With Small Animal Clinical Nutrition, or similar texts for professionals		Familiar With Professional websites		Yes (Please specify)	NRC	1-2 hours per day	Female	41-50
1		Selected		4		Yes		Internet															Somewhat	Somewhat	Unnecessary	Beneficial	Beneficial	Unnecessary	Agree Somewhat	Agree Somewhat	Agree Somewhat	Agree Somewhat	Don't Know	Agree Strongly	Agree Strongly	Agree Somewhat									No		More than 2 hours per day	Female	51-60
1		Selected	Selected	2	2	Yes			Friend/family member														Very much	Very much	Beneficial	Beneficial	Beneficial	Unnecessary	Disagree Somewhat	Disagree Somewhat	Disagree Somewhat	Agree Strongly	Disagree Somewhat	Disagree Somewhat	Agree Strongly	Agree Somewhat									No		More than 2 hours per day	Female	51-60
1			Selected		2	Yes		Internet					My veterinarian										Very much	Very much	Beneficial	Beneficial	Beneficial	Beneficial	Agree Strongly	Agree Somewhat	Agree Somewhat	Agree Strongly	Disagree Somewhat	Disagree Somewhat	Agree Strongly	Agree Strongly			Familiar With National Research Council: Nutrient Requirements for Dogs and Cats				Familiar With Professional websites		No		More than 2 hours per day	Female	31-40
1		Selected	Selected	2	1	Yes		Internet															Somewhat	Somewhat	Beneficial	Beneficial	Beneficial	Beneficial	Agree Strongly	Agree Strongly	Agree Somewhat	Agree Strongly	Agree Somewhat	Agree Somewhat	Agree Strongly	Agree Strongly									No		1-2 hours per day	Female	41-50
1			Selected		2	Yes							My veterinarian		Book, magazine or other printed source written by a veterinarian other than your own		Used a published reference source	Used information from an online resource					Somewhat	Not very much	Unnecessary	Unnecessary	Unnecessary	Beneficial	Agree Strongly	Agree Somewhat	Agree Strongly	Agree Somewhat	Agree Somewhat	Agree Strongly	Agree Strongly	Agree Strongly									No		1-2 hours per day	Female	61 or older
1		Selected		2		Yes		Internet	Friend/family member							Consult with a nutritionist or veterinarian		Used information from an online resource					Very much	Very much	Beneficial	Unnecessary	Unnecessary	Beneficial	Agree Strongly	Agree Strongly	Agree Strongly	Agree Strongly	Agree Somewhat	Agree Somewhat	Agree Strongly	Agree Strongly											More than 2 hours per day	Female	31-40
1		Selected	Selected	2	1	Yes		Internet														Decided proportions and composition based on availability	Very much	Very much	Beneficial	Beneficial	Beneficial	Unnecessary	Agree Somewhat	Agree Somewhat	Agree Somewhat	Agree Somewhat	Agree Somewhat	Agree Somewhat	Disagree Somewhat	Agree Somewhat		Consulted Association of American Feed Control Officials Publications		Consulted National Research Council: Nutrient Requirements for Dogs and Cats		Consulted Small Animal Clinical Nutrition, or similar texts for professionals		Consulted Professional websites	No		More than 2 hours per day	Female	18-30
1			Selected		3	Yes						Pet store employee				Consult with a nutritionist or veterinarian							Somewhat	Not very much	Unnecessary	Unnecessary	Unnecessary	Beneficial	Agree Somewhat	Agree Somewhat	Disagree Strongly	Disagree Strongly	Agree Somewhat	Disagree Somewhat	Disagree Strongly	Disagree Strongly							Familiar With Professional websites	Consulted Professional websites	Yes (Please specify)	DVM	1-2 hours per day	Female	51-60
1			Selected		9	Yes		Internet										Used information from an online resource				Decided proportions and composition based on availability	Somewhat	A little	Unnecessary	Harmful	Harmful	Beneficial	Agree Strongly	Agree Somewhat	Agree Strongly	Agree Strongly	Agree Strongly	Agree Somewhat	Agree Strongly	Agree Strongly			Familiar With National Research Council: Nutrient Requirements for Dogs and Cats								More than 2 hours per day	Female	51-60
1			Selected		4	Yes		Internet	Friend/family member									Used information from an online resource	Friend/family member				Very much	Somewhat	Beneficial	Beneficial	Beneficial	Beneficial	Don't Know	Agree Somewhat	Agree Strongly	Agree Strongly	Disagree Somewhat	Agree Strongly	Agree Strongly	Agree Somewhat							Familiar With Professional websites		No		1-2 hours per day	Female	61 or older
1		Selected		3		Yes							My veterinarian										Very much	Very much	Beneficial	Beneficial	Beneficial	Beneficial	Disagree Somewhat	Agree Strongly	Don't Know	Don't Know	Disagree Strongly	Disagree Somewhat	Don't Know	Disagree Somewhat									No		More than 2 hours per day	Female	51-60
1		Selected		3		Yes		Internet															Very much	Somewhat	Beneficial	Beneficial	Beneficial	Beneficial	Disagree Somewhat	Agree Somewhat	Agree Strongly	Agree Strongly	Disagree Strongly	Disagree Strongly	Agree Strongly	Agree Strongly	Familiar With Association of American Feed Control Officials Publications		Familiar With National Research Council: Nutrient Requirements for Dogs and Cats		Familiar With Small Animal Clinical Nutrition, or similar texts for professionals		Familiar With Professional websites		No		More than 2 hours per day	Male	18-30
1		Selected		1		Yes		Internet															A little	Very much	Harmful	Beneficial	Beneficial	Beneficial	Agree Strongly	Agree Strongly	Agree Strongly	Agree Strongly	Agree Somewhat	Agree Strongly	Agree Strongly	Agree Strongly	Familiar With Association of American Feed Control Officials Publications		Familiar With National Research Council: Nutrient Requirements for Dogs and Cats		Familiar With Small Animal Clinical Nutrition, or similar texts for professionals		Familiar With Professional websites		Yes (Please specify)		1-2 hours per day	Female	61 or older
1		Selected		9		Yes			Friend/family member														Very much	Very much	Beneficial	Beneficial	Beneficial	Beneficial	Agree Strongly	Agree Somewhat	Disagree Somewhat	Agree Somewhat	Don't Know	Don't Know	Agree Strongly	Agree Strongly									No		Less than one hour per day	Female	51-60
1		Selected		6		Yes		Internet										Used information from an online resource					Somewhat	Not very much	Beneficial	Beneficial	Beneficial	Unnecessary	Agree Somewhat	Agree Somewhat	Agree Strongly	Agree Strongly	Disagree Somewhat	Agree Strongly	Agree Strongly	Agree Strongly									Yes (Please specify)	Cat info, Winn foundation,	1-2 hours per day	Female	51-60
1			Selected		2	Yes		Internet		Magazine	Book		My veterinarian		Book, magazine or other printed source written by a veterinarian other than your own		Used a published reference source						Somewhat	Somewhat	Unnecessary	Harmful	Harmful	Beneficial	Agree Strongly	Agree Strongly	Agree Strongly	Agree Strongly	Disagree Somewhat	Disagree Somewhat	Agree Strongly	Agree Strongly			Familiar With National Research Council: Nutrient Requirements for Dogs and Cats					Consulted Professional websites	Yes (Please specify)	Dr. Donald Strombeck's website	1-2 hours per day	Female	61 or older
1		Selected	Selected	3	2	Yes		Internet		Magazine			My veterinarian					Used information from an online resource					Somewhat	Somewhat	Harmful	Harmful	Harmful	Unnecessary	Agree Strongly	Agree Strongly	Agree Strongly	Agree Strongly	Agree Somewhat	Agree Somewhat	Agree Strongly	Agree Strongly									Yes (Please specify)	Dogs Naturally Magazine, raw feeders groups and activists	More than 2 hours per day	Female	41-50
1		Selected		3		Yes		Internet						Email group				Used information from an online resource					Somewhat	Somewhat	Beneficial	Beneficial	Beneficial	Beneficial	Agree Strongly	Agree Somewhat	Agree Strongly	Agree Somewhat	Agree Strongly	Agree Strongly	Agree Strongly	Agree Strongly								Consulted Professional websites	Yes (Please specify)	www.cachorroverde.com.br	More than 2 hours per day	Female	31-40
1			Selected		1	No																	Very much	Very much	Beneficial	Beneficial	Beneficial	Beneficial	Disagree Somewhat	Agree Strongly	Agree Somewhat	Agree Strongly		Disagree Somewhat	Agree Strongly	Agree Somewhat									Yes (Please specify)	Veterinarian	More than 2 hours per day	Female	41-50
1			Selected		2	Yes			Friend/family member										Friend/family member				Very much	Very much	Beneficial	Beneficial	Beneficial	Beneficial	Agree Somewhat	Agree Somewhat	Agree Somewhat	Agree Strongly	Disagree Somewhat	Agree Somewhat	Agree Strongly	Agree Somewhat									No		More than 2 hours per day	Male	51-60
1			Selected		1	Yes		Internet	Friend/family member	Magazine	Book			Email group	Book, magazine or other printed source written by a veterinarian other than your own							Decided proportions and composition based on availability	Somewhat	A little	Unnecessary	Beneficial	Beneficial	Beneficial	Agree Strongly	Agree Somewhat	Agree Somewhat	Agree Somewhat	Agree Somewhat	Agree Somewhat	Agree Strongly	Agree Strongly	Familiar With Association of American Feed Control Officials Publications		Familiar With National Research Council: Nutrient Requirements for Dogs and Cats				Familiar With Professional websites		No		More than 2 hours per day	Female	41-50
1		Selected	Selected	2	6	Yes	Breeder instructions or advice	Internet	Friend/family member							Consult with a nutritionist or veterinarian		Used information from an online resource	Friend/family member	Breeder			Somewhat	Not very much	Unnecessary	Unnecessary	Unnecessary	Beneficial	Agree Strongly	Agree Somewhat	Agree Strongly	Agree Somewhat	Disagree Somewhat	Agree Strongly	Agree Strongly	Agree Strongly	Familiar With Association of American Feed Control Officials Publications	Consulted Association of American Feed Control Officials Publications	Familiar With National Research Council: Nutrient Requirements for Dogs and Cats		Familiar With Small Animal Clinical Nutrition, or similar texts for professionals	Consulted Small Animal Clinical Nutrition, or similar texts for professionals	Familiar With Professional websites	Consulted Professional websites	Yes (Please specify)	Pet food grades	More than 2 hours per day	Female	18-30
1			Selected		2	Yes							My veterinarian		Book, magazine or other printed source written by a veterinarian other than your own								Very much	Very much	Beneficial	Beneficial	Beneficial	Beneficial	Agree Somewhat	Agree Somewhat	Agree Strongly	Agree Strongly	Disagree Strongly	Disagree Strongly	Agree Strongly	Don't Know	Familiar With Association of American Feed Control Officials Publications		Familiar With National Research Council: Nutrient Requirements for Dogs and Cats		Familiar With Small Animal Clinical Nutrition, or similar texts for professionals		Familiar With Professional websites		Yes (Please specify)	Pet Nutrition Alliance	1-2 hours per day	Female	51-60
1			Selected		4	No																	Somewhat	A little	Beneficial	Beneficial	Beneficial	Beneficial	Agree Somewhat	Agree Somewhat	Agree Somewhat	Agree Somewhat	Disagree Somewhat	Agree Strongly	Agree Strongly	Agree Strongly		Consulted Association of American Feed Control Officials Publications	Familiar With National Research Council: Nutrient Requirements for Dogs and Cats			Consulted Small Animal Clinical Nutrition, or similar texts for professionals		Consulted Professional websites	No		1-2 hours per day	Female	31-40
1			Selected		1	Yes			Friend/family member		Book		My veterinarian		Book, magazine or other printed source written by a veterinarian other than your own	Consult with a nutritionist or veterinarian	Used a published reference source						Very much	Very much	Beneficial	Beneficial	Beneficial	Beneficial	Agree Somewhat	Agree Somewhat	Agree Strongly	Agree Strongly	Disagree Somewhat	Don't Know	Agree Strongly	Agree Strongly	Familiar With Association of American Feed Control Officials Publications						Familiar With Professional websites		Yes (Please specify)	Dr. Pitcairn	Less than one hour per day	Female	61 or older
1		Selected	Selected	1	2	Yes			Friend/family member														Very much	Very much	Beneficial	Beneficial	Beneficial	Beneficial	Agree Somewhat	Agree Somewhat	Agree Somewhat	Agree Somewhat	Disagree Somewhat	Agree Strongly	Agree Strongly	Agree Somewhat									No		1-2 hours per day	Female	31-40
1		Selected	Selected	1	2	Yes			Friend/family member	Magazine				Email group	Book, magazine or other printed source written by a veterinarian other than your own								Very much	Somewhat	Beneficial	Beneficial	Beneficial	Beneficial	Agree Somewhat	Agree Strongly	Agree Strongly	Agree Somewhat	Agree Somewhat		Agree Strongly	Agree Strongly							Familiar With Professional websites		Yes (Please specify)	Dr Dodds on the computer/ because both dogs are rescued & came with health problems & injuries/ went to other vets for each dog to help with problems in their health	Less than one hour per day	Female	61 or older
1			Selected		2	Yes	Breeder instructions or advice	Internet	Friend/family member									Used information from an online resource		Breeder			Very much	Very much	Beneficial	Beneficial	Beneficial	Beneficial	Agree Somewhat	Agree Somewhat	Agree Strongly	Agree Somewhat	Agree Strongly	Agree Strongly	Agree Strongly	Don't Know									No		More than 2 hours per day	Female	41-50
1		Selected		2		Yes		Internet										Used information from an online resource					Very much	Somewhat	Beneficial	Beneficial	Beneficial	Beneficial	Agree Somewhat	Agree Somewhat	Agree Somewhat	Agree Somewhat	Disagree Somewhat	Don't Know	Agree Strongly	Don't Know									Yes (Please specify)	Cat centric and other raw diet websites	More than 2 hours per day	Female	41-50
1		Selected	Selected	2	2	Yes	Breeder instructions or advice	Internet		Magazine					Book, magazine or other printed source written by a veterinarian other than your own								Somewhat	Somewhat	Beneficial	Beneficial	Beneficial	Beneficial	Agree Strongly	Agree Strongly	Agree Strongly	Agree Somewhat	Disagree Strongly	Disagree Strongly	Agree Strongly	Agree Strongly		Consulted Association of American Feed Control Officials Publications	Familiar With National Research Council: Nutrient Requirements for Dogs and Cats			Consulted Small Animal Clinical Nutrition, or similar texts for professionals	Familiar With Professional websites	Consulted Professional websites	Yes (Please specify)	JAVMA, AJVR	More than 2 hours per day	Male	61 or older
1			Selected		1	Yes									Book, magazine or other printed source written by a veterinarian other than your own		Used a published reference source						Somewhat	Not very much	Harmful	Harmful	Harmful	Beneficial	Agree Strongly	Agree Strongly	Agree Strongly	Agree Strongly	Agree Strongly	Agree Strongly	Agree Strongly	Agree Strongly									Yes (Please specify)	Dogs Naturally	1-2 hours per day	Female	61 or older
1		Selected		6		Yes		Internet										Used information from an online resource					Somewhat	Not very much	Beneficial	Beneficial	Beneficial	Unnecessary	Agree Strongly	Agree Somewhat	Agree Strongly	Agree Somewhat	Disagree Somewhat	Agree Strongly	Agree Strongly	Agree Strongly									Yes (Please specify)	feline nutrition.org, various facebook groups	1-2 hours per day	Female	31-40
1			Selected		1	Yes		Internet									Used a published reference source	Used information from an online resource					Very much	Very much	Beneficial	Beneficial	Beneficial	Beneficial	Disagree Somewhat	Disagree Somewhat	Agree Strongly	Disagree Somewhat	Don't Know	Agree Strongly	Agree Strongly	Agree Strongly									Yes (Please specify)	In Brazil, we have www.cachorroverde.com.br as main reference on the subject	More than 2 hours per day	Female	18-30
1			Selected		3	Yes	Breeder instructions or advice	Internet		Magazine				Email group	Book, magazine or other printed source written by a veterinarian other than your own		Used a published reference source	Used information from an online resource		Breeder			Somewhat	A little	Beneficial	Unnecessary	Beneficial	Unnecessary	Disagree Somewhat	Agree Strongly	Agree Strongly	Agree Strongly	Agree Strongly	Agree Strongly	Agree Strongly	Agree Strongly	Familiar With Association of American Feed Control Officials Publications		Familiar With National Research Council: Nutrient Requirements for Dogs and Cats		Familiar With Small Animal Clinical Nutrition, or similar texts for professionals		Familiar With Professional websites		No		1-2 hours per day	Female	41-50
1		Selected	Selected	2	1	Yes		Internet	Friend/family member			Pet store employee											Very much	Very much	Beneficial	Beneficial	Beneficial	Beneficial	Agree Somewhat	Agree Somewhat	Agree Strongly	Agree Strongly	Agree Somewhat	Agree Somewhat	Agree Strongly	Agree Strongly					Familiar With Small Animal Clinical Nutrition, or similar texts for professionals		Familiar With Professional websites	Consulted Professional websites	No		More than 2 hours per day	Female	18-30
1		Selected		2		No																	Very much	Not very much	Beneficial	Beneficial	Beneficial	Beneficial	Agree Strongly	Agree Somewhat	Agree Strongly	Agree Strongly	Agree Somewhat	Agree Strongly	Agree Strongly	Agree Strongly									Yes (Please specify)	I am Australian, though the above have been discussed in various forums, I don't hold them in high esteem	1-2 hours per day	Female	41-50
1			Selected		5	Yes					Book			Email group	Book, magazine or other printed source written by a veterinarian other than your own	Consult with a nutritionist or veterinarian						Decided proportions and composition based on availability	Very much	Not very much	Unnecessary	Beneficial	Beneficial	Beneficial	Agree Somewhat	Disagree Somewhat	Agree Strongly	Agree Somewhat	Agree Somewhat	Agree Strongly	Agree Strongly	Disagree Somewhat	Familiar With Association of American Feed Control Officials Publications		Familiar With National Research Council: Nutrient Requirements for Dogs and Cats		Familiar With Small Animal Clinical Nutrition, or similar texts for professionals		Familiar With Professional websites		No		1-2 hours per day	Female	51-60
1			Selected		2	Yes		Internet		Magazine							Used a published reference source	Used information from an online resource					Somewhat	Not very much	Beneficial	Beneficial	Beneficial	Beneficial	Agree Somewhat	Agree Somewhat	Agree Strongly	Agree Strongly	Agree Somewhat	Agree Strongly	Agree Strongly	Agree Strongly	Familiar With Association of American Feed Control Officials Publications						Familiar With Professional websites		No		More than 2 hours per day	Female	18-30
1			Selected		8	Yes									Book, magazine or other printed source written by a veterinarian other than your own	Consult with a nutritionist or veterinarian							Not very much	Not very much	Harmful	Harmful	Harmful	Beneficial	Agree Strongly	Agree Strongly	Agree Strongly	Agree Strongly	Agree Somewhat	Agree Somewhat	Agree Strongly	Agree Strongly									Yes (Please specify)		More than 2 hours per day	Female	51-60
1			Selected		1	Yes		Internet		Magazine	Book				Book, magazine or other printed source written by a veterinarian other than your own		Used a published reference source	Used information from an online resource					Very much	Not very much	Harmful	Beneficial	Harmful	Beneficial	Agree Strongly	Agree Somewhat	Agree Strongly	Agree Strongly	Disagree Somewhat	Agree Strongly	Agree Strongly	Agree Strongly		Consulted Association of American Feed Control Officials Publications	Familiar With National Research Council: Nutrient Requirements for Dogs and Cats	Consulted National Research Council: Nutrient Requirements for Dogs and Cats			Familiar With Professional websites	Consulted Professional websites	Yes (Please specify)	Dr. Karen Becker "Real Food For Healthy Dogs and Cats" and Mercola Healthy Pets	More than 2 hours per day	Female	18-30
1			Selected		2	Yes		Internet															Somewhat	A little	Beneficial	Beneficial	Beneficial	Beneficial	Agree Somewhat	Agree Somewhat	Agree Strongly	Agree Strongly	Agree Strongly	Agree Strongly	Agree Strongly	Agree Strongly	Familiar With Association of American Feed Control Officials Publications		Familiar With National Research Council: Nutrient Requirements for Dogs and Cats		Familiar With Small Animal Clinical Nutrition, or similar texts for professionals		Familiar With Professional websites		No		1-2 hours per day	Female	18-30
1			Selected		1	Yes		Internet															Very much	Somewhat	Beneficial	Beneficial	Beneficial	Beneficial	Disagree Strongly	Disagree Somewhat	Disagree Somewhat	Agree Somewhat	Agree Somewhat	Agree Somewhat	Agree Strongly	Agree Strongly									No		More than 2 hours per day	Female	31-40
1			Selected		4	No																	Very much	Somewhat	Unnecessary	Unnecessary	Unnecessary	Beneficial	Agree Somewhat	Agree Somewhat	Agree Strongly	Agree Strongly	Agree Strongly	Agree Strongly	Agree Strongly	Agree Strongly									No		More than 2 hours per day	Female	31-40
1		Selected		3		Yes		Internet															Not very much	Not very much	Harmful	Beneficial	Beneficial	Beneficial	Agree Somewhat	Agree Somewhat	Agree Strongly	Agree Strongly	Disagree Somewhat	Agree Strongly	Agree Strongly	Disagree Somewhat	Familiar With Association of American Feed Control Officials Publications		Familiar With National Research Council: Nutrient Requirements for Dogs and Cats		Familiar With Small Animal Clinical Nutrition, or similar texts for professionals		Familiar With Professional websites		Yes (Please specify)	I love Dr. Pierson at catinfo.org. I fed a previous cat raw because of FLUTD and having had a PU.	More than 2 hours per day	Female	41-50
1			Selected		5	Yes			Friend/family member								Used a published reference source	Used information from an online resource	Friend/family member				Somewhat	Not very much	Harmful	Harmful	Unnecessary	Beneficial	Agree Strongly	Agree Somewhat	Agree Strongly	Agree Somewhat	Agree Somewhat	Agree Strongly	Agree Strongly	Agree Somewhat	Familiar With Association of American Feed Control Officials Publications		Familiar With National Research Council: Nutrient Requirements for Dogs and Cats				Familiar With Professional websites		Yes (Please specify)	Dogs Naturly Mag and seminars, Paul Hellings website out of New Zealand,various other internet sources, and a book on the Raw Meaty Bone Diet.	1-2 hours per day	Female	61 or older
1		Selected	Selected	1	2	Yes		Internet	Friend/family member			Pet store employee			Book, magazine or other printed source written by a veterinarian other than your own			Used information from an online resource	Friend/family member		Pet store personnel		Very much	Somewhat	Beneficial	Beneficial	Beneficial	Beneficial	Agree Strongly	Agree Somewhat	Agree Strongly	Agree Somewhat	Don't Know	Agree Somewhat	Agree Strongly	Agree Strongly	Familiar With Association of American Feed Control Officials Publications		Familiar With National Research Council: Nutrient Requirements for Dogs and Cats	Consulted National Research Council: Nutrient Requirements for Dogs and Cats			Familiar With Professional websites	Consulted Professional websites	Yes (Please specify)	Kymthe Schultz, Dr. Karen Becker	More than 2 hours per day	Female	18-30
1			Selected		1	Yes	Breeder instructions or advice		Friend/family member										Friend/family member	Breeder			Very much	Somewhat	Beneficial	Beneficial	Unnecessary	Beneficial	Agree Strongly	Agree Strongly	Agree Strongly	Agree Strongly	Agree Somewhat	Agree Somewhat	Agree Strongly	Agree Strongly							Familiar With Professional websites				Less than one hour per day	Female	51-60
1		Selected	Selected	1	2	Yes		Internet			Book							Used information from an online resource	Friend/family member				Somewhat	Not very much	Harmful	Harmful	Beneficial	Unnecessary	Agree Somewhat	Agree Somewhat	Agree Strongly	Agree Strongly	Agree Somewhat	Agree Strongly	Agree Strongly	Agree Strongly											1-2 hours per day	Female	31-40
1		Selected	Selected	3	6	Yes	Breeder instructions or advice	Internet	Friend/family member	Magazine				Email group	Book, magazine or other printed source written by a veterinarian other than your own	Consult with a nutritionist or veterinarian	Used a published reference source		Friend/family member				Very much	Not very much	Beneficial	Harmful	Beneficial	Beneficial	Agree Strongly	Agree Strongly	Agree Strongly	Agree Strongly	Disagree Somewhat	Agree Strongly	Agree Strongly	Agree Strongly									Yes (Please specify)	Animal Nutrientist	More than 2 hours per day	Female	18-30
1		Selected	Selected	6	2	No																	Somewhat	Not very much	Harmful	Harmful	Harmful	Beneficial	Agree Strongly	Agree Strongly	Agree Strongly	Agree Strongly	Disagree Somewhat	Agree Strongly	Agree Strongly	Agree Strongly	Familiar With Association of American Feed Control Officials Publications						Familiar With Professional websites		Yes (Please specify)	CatCentric	More than 2 hours per day	Female	31-40
1			Selected		1	Yes	Breeder instructions or advice																Somewhat	Somewhat	Beneficial	Beneficial	Beneficial	Beneficial	Agree Somewhat	Agree Somewhat	Agree Somewhat	Agree Somewhat	Don't Know	Don't Know	Agree Strongly	Don't Know									No		Less than one hour per day	Female	61 or older
1		Selected	Selected	2	2	Yes		Internet			Book			Email group	Book, magazine or other printed source written by a veterinarian other than your own		Used a published reference source						Somewhat	Not very much	Harmful	Harmful	Harmful	Beneficial	Agree Strongly	Agree Strongly	Agree Strongly	Agree Strongly	Agree Somewhat	Agree Somewhat	Agree Strongly	Agree Somewhat	Familiar With Association of American Feed Control Officials Publications										Less than one hour per day	Female	41-50
1			Selected		1	Yes	Breeder instructions or advice													Breeder			Somewhat	Somewhat		Harmful	Unnecessary	Beneficial	Agree Strongly	Agree Somewhat	Agree Strongly	Agree Somewhat	Agree Strongly	Agree Strongly	Agree Strongly	Agree Strongly									No		1-2 hours per day	Female	61 or older
1		Selected	Selected	4	2	Yes		Internet										Used information from an online resource	Friend/family member				Somewhat	Not very much	Unnecessary	Unnecessary	Unnecessary	Beneficial	Agree Somewhat	Disagree Somewhat	Agree Strongly	Agree Somewhat	Don't Know	Agree Strongly	Agree Somewhat	Agree Somewhat											More than 2 hours per day	Female	41-50
1		Selected	Selected	1	1	Yes		Internet	Friend/family member		Book						Used a published reference source	Used information from an online resource	Friend/family member			Decided proportions and composition based on availability	Not very much	Not very much	Unnecessary	Harmful	Unnecessary	Unnecessary	Agree Strongly	Agree Strongly	Agree Strongly	Agree Strongly	Agree Somewhat	Agree Strongly	Agree Strongly	Agree Strongly							Familiar With Professional websites		Yes (Please specify)	Dr. Karen becker!	Less than one hour per day	Female	31-40
1		Selected	Selected	5	2	Yes		Internet			Book			Email group									Very much	Somewhat	Beneficial	Beneficial	Beneficial	Beneficial	Agree Strongly	Agree Strongly	Agree Strongly	Agree Strongly	Agree Somewhat	Agree Somewhat	Agree Strongly	Agree Strongly											Less than one hour per day	Female	41-50
1		Selected	Selected	5	1	Yes	Breeder instructions or advice																Somewhat	Somewhat	Beneficial	Beneficial	Beneficial	Beneficial	Agree Somewhat	Agree Somewhat	Agree Strongly	Agree Strongly	Agree Somewhat	Agree Somewhat	Agree Strongly	Agree Somewhat								Consulted Professional websites			More than 2 hours per day	Female	41-50
1		Selected		1		Yes		Internet															Very much	Very much	Beneficial	Beneficial	Beneficial	Beneficial	Agree Somewhat	Agree Somewhat	Disagree Somewhat	Agree Strongly	Don't Know	Don't Know	Agree Strongly	Don't Know									No		More than 2 hours per day	Female	18-30
1		Selected	Selected	5	1	Yes	Breeder instructions or advice						My veterinarian										Very much	Very much	Beneficial	Beneficial	Beneficial	Beneficial	Disagree Somewhat	Disagree Somewhat	Agree Strongly	Agree Strongly	Agree Somewhat	Disagree Strongly	Agree Strongly	Don't Know	Familiar With Association of American Feed Control Officials Publications		Familiar With National Research Council: Nutrient Requirements for Dogs and Cats		Familiar With Small Animal Clinical Nutrition, or similar texts for professionals		Familiar With Professional websites		No		More than 2 hours per day	Female	31-40
1		Selected		8		Yes		Internet										Used information from an online resource					Somewhat	Not very much	Harmful	Harmful	Beneficial	Beneficial	Agree Somewhat	Agree Somewhat	Agree Strongly	Agree Somewhat	Agree Somewhat	Agree Strongly	Agree Strongly	Agree Strongly	Familiar With Association of American Feed Control Officials Publications		Familiar With National Research Council: Nutrient Requirements for Dogs and Cats		Familiar With Small Animal Clinical Nutrition, or similar texts for professionals		Familiar With Professional websites	Consulted Professional websites	No		More than 2 hours per day	Female	31-40
1			Selected		4	No																	Very much	Somewhat	Beneficial	Beneficial	Beneficial	Beneficial	Agree Somewhat	Agree Somewhat	Agree Strongly	Agree Somewhat	Agree Strongly	Agree Strongly	Agree Strongly	Agree Strongly	Familiar With Association of American Feed Control Officials Publications		Familiar With National Research Council: Nutrient Requirements for Dogs and Cats		Familiar With Small Animal Clinical Nutrition, or similar texts for professionals			Consulted Professional websites	No		1-2 hours per day	Male	18-30
1			Selected		2	Yes			Friend/family member									Used information from an online resource	Friend/family member	Breeder			Very much	Not very much	Beneficial	Beneficial	Unnecessary	Unnecessary	Agree Strongly	Agree Strongly	Agree Strongly	Agree Strongly	Agree Strongly	Agree Strongly	Agree Strongly	Agree Somewhat									No		1-2 hours per day	Female	18-30
1			Selected		2	Yes		Internet										Used information from an online resource				Decided proportions and composition based on availability	Somewhat	A little	Unnecessary	Unnecessary	Unnecessary	Unnecessary	Agree Somewhat	Agree Somewhat	Agree Somewhat	Agree Somewhat	Agree Strongly	Agree Strongly	Agree Strongly	Agree Strongly									Yes (Please specify)	Dogs Naturally Magazine	More than 2 hours per day	Female	18-30
1		Selected	Selected	2	2	Yes		Internet															Very much	Somewhat	Beneficial	Beneficial	Beneficial	Beneficial	Agree Somewhat	Agree Somewhat	Agree Somewhat	Agree Somewhat	Agree Somewhat	Agree Somewhat	Agree Strongly	Agree Strongly	Familiar With Association of American Feed Control Officials Publications		Familiar With National Research Council: Nutrient Requirements for Dogs and Cats		Familiar With Small Animal Clinical Nutrition, or similar texts for professionals		Familiar With Professional websites		Yes (Please specify)	Various websites, I try to find things written or endorsed by a VMD or DVM. I don't put a ton of stock in pet owner opinions if they have no degree/credentials to back them up.	More than 2 hours per day	Female	18-30
1		Selected	Selected	1	1	Yes		Internet	Friend/family member									Used information from an online resource	Friend/family member				Very much	Very much	Beneficial	Beneficial	Beneficial	Harmful	Agree Somewhat	Agree Somewhat	Agree Somewhat	Agree Strongly	Disagree Strongly	Agree Somewhat	Agree Strongly	Agree Strongly	Familiar With Association of American Feed Control Officials Publications				Familiar With Small Animal Clinical Nutrition, or similar texts for professionals		Familiar With Professional websites		No		More than 2 hours per day	Female	18-30
1			Selected		1	Yes		Internet	Friend/family member	Magazine		Pet store employee	My veterinarian	Email group									Very much	Very much	Beneficial	Beneficial	Beneficial	Beneficial	Disagree Somewhat	Disagree Somewhat	Agree Strongly	Agree Strongly	Disagree Strongly	Disagree Strongly	Agree Strongly	Agree Strongly	Familiar With Association of American Feed Control Officials Publications		Familiar With National Research Council: Nutrient Requirements for Dogs and Cats		Familiar With Small Animal Clinical Nutrition, or similar texts for professionals		Familiar With Professional websites				More than 2 hours per day	Female	18-30
1			Selected		3	Yes		Internet	Friend/family member		Book		My veterinarian	Email group	Book, magazine or other printed source written by a veterinarian other than your own		Used a published reference source	Used information from an online resource	Friend/family member				Somewhat	Somewhat	Beneficial	Beneficial	Beneficial	Beneficial	Agree Strongly	Agree Somewhat	Agree Strongly	Agree Somewhat	Agree Somewhat	Agree Somewhat	Agree Strongly	Agree Strongly			Familiar With National Research Council: Nutrient Requirements for Dogs and Cats				Familiar With Professional websites				More than 2 hours per day	Female	51-60
1		Selected		3		Yes							My veterinarian			Consult with a nutritionist or veterinarian	Used a published reference source	Used information from an online resource					Somewhat	Not very much	Unnecessary	Beneficial	Unnecessary	Beneficial	Agree Somewhat	Agree Somewhat	Agree Strongly	Agree Somewhat	Disagree Strongly	Agree Strongly	Agree Strongly	Agree Strongly									No		1-2 hours per day	Female	51-60
1		Selected	Selected	2	2	Yes		Internet							Book, magazine or other printed source written by a veterinarian other than your own	Consult with a nutritionist or veterinarian	Used a published reference source	Used information from an online resource					A little	Not very much	Harmful	Beneficial			Agree Somewhat	Disagree Strongly	Agree Strongly	Disagree Somewhat	Agree Somewhat	Agree Strongly	Agree Strongly	Agree Strongly									Yes (Please specify)	www.cachorroverde.com	More than 2 hours per day	Female	41-50
1			Selected		2	No																	Somewhat	Somewhat	Beneficial	Beneficial	Unnecessary	Beneficial	Agree Somewhat	Agree Strongly	Agree Somewhat	Agree Somewhat	Disagree Strongly	Disagree Strongly	Agree Somewhat	Agree Somewhat								Consulted Professional websites	No		1-2 hours per day	Female	31-40
1			Selected		2	Yes		Internet															Very much	Very much	Beneficial	Beneficial	Beneficial	Beneficial	Disagree Somewhat	Agree Somewhat	Agree Somewhat	Agree Somewhat	Don't Know	Don't Know	Agree Strongly	Agree Strongly											More than 2 hours per day	Male	31-40
1		Selected		2		Yes		Internet										Used information from an online resource					Very much	Somewhat	Beneficial	Unnecessary	Beneficial	Beneficial	Disagree Somewhat	Disagree Somewhat	Agree Strongly	Agree Somewhat		Disagree Somewhat	Agree Strongly	Agree Strongly											1-2 hours per day	Female	31-40
1		Selected	Selected	1	2	Yes			Friend/family member		Book				Book, magazine or other printed source written by a veterinarian other than your own		Used a published reference source	Used information from an online resource			Pet store personnel		Somewhat	Not very much	Beneficial	Harmful	Beneficial	Unnecessary	Agree Strongly	Agree Strongly	Agree Strongly	Agree Somewhat	Agree Somewhat	Agree Somewhat	Agree Strongly	Agree Strongly	Familiar With Association of American Feed Control Officials Publications		Familiar With National Research Council: Nutrient Requirements for Dogs and Cats	Consulted National Research Council: Nutrient Requirements for Dogs and Cats	Familiar With Small Animal Clinical Nutrition, or similar texts for professionals	Consulted Small Animal Clinical Nutrition, or similar texts for professionals	Familiar With Professional websites		Yes (Please specify)	Dr. Meg Smart, Dr. Karen Backer, Dr. Peter Dobias, Dr. Tom Lonsdale etc...	More than 2 hours per day	Male	41-50
1		Selected	Selected	2	1	Yes		Internet										Used information from an online resource					Somewhat	Not very much	Beneficial	Beneficial	Beneficial	Beneficial	Agree Strongly	Agree Strongly	Agree Strongly	Agree Strongly	Disagree Strongly	Agree Strongly	Agree Strongly	Agree Somewhat									Yes (Please specify)	catinfo.org, Cat CRAP (Facebook group), Raw Tips (Facebook group), Mercola Healthy Pets	More than 2 hours per day	Female	18-30
1			Selected		2	Yes			Friend/family member	Magazine								Used information from an online resource	Friend/family member				Very much	Somewhat	Beneficial	Beneficial	Beneficial	Beneficial	Agree Somewhat	Agree Strongly	Agree Strongly	Agree Strongly	Disagree Somewhat	Agree Somewhat	Agree Strongly	Agree Strongly	Familiar With Association of American Feed Control Officials Publications		Familiar With National Research Council: Nutrient Requirements for Dogs and Cats						No		1-2 hours per day	Female	61 or older
1		Selected	Selected	1	1	Yes								Email group			Used a published reference source						Very much	Not very much	Harmful	Beneficial	Beneficial	Unnecessary	Agree Strongly	Agree Strongly	Agree Strongly	Agree Strongly	Disagree Somewhat	Agree Strongly	Agree Strongly	Don't Know	Familiar With Association of American Feed Control Officials Publications		Familiar With National Research Council: Nutrient Requirements for Dogs and Cats		Familiar With Small Animal Clinical Nutrition, or similar texts for professionals		Familiar With Professional websites		No		1-2 hours per day	Female	31-40
1		Selected		1		Yes			Friend/family member														Somewhat	Somewhat	Beneficial	Beneficial	Beneficial	Beneficial	Agree Strongly	Agree Somewhat	Agree Strongly	Don't Know	Don't Know	Agree Somewhat	Agree Strongly	Agree Strongly	Familiar With Association of American Feed Control Officials Publications		Familiar With National Research Council: Nutrient Requirements for Dogs and Cats		Familiar With Small Animal Clinical Nutrition, or similar texts for professionals		Familiar With Professional websites		No		More than 2 hours per day	Female	18-30
1			Selected		6	Yes		Internet															Somewhat	Not very much	Beneficial	Beneficial	Beneficial	Beneficial	Disagree Somewhat	Agree Strongly	Agree Strongly	Agree Strongly	Don't Know	Don't Know	Agree Strongly	Agree Strongly											1-2 hours per day	Male	18-30
1			Selected		2	Yes		Internet									Used a published reference source						Somewhat	Not very much	Unnecessary	Beneficial	Beneficial	Unnecessary	Agree Strongly	Agree Strongly	Agree Strongly	Agree Strongly	Agree Somewhat	Agree Somewhat	Agree Strongly	Agree Strongly			Familiar With National Research Council: Nutrient Requirements for Dogs and Cats				Familiar With Professional websites		Yes (Please specify)	Books written by holistic veterinarians	More than 2 hours per day	Female	41-50
1			Selected		2	Yes		Internet															Somewhat	Somewhat	Beneficial	Beneficial	Beneficial	Beneficial	Agree Strongly	Agree Strongly	Agree Somewhat	Agree Strongly	Agree Strongly	Don't Know	Agree Strongly	Agree Strongly									No		More than 2 hours per day	Female	31-40
1			Selected		2	Yes		Internet						Email group				Used information from an online resource	Friend/family member	Breeder			Somewhat	A little	Unnecessary	Beneficial	Beneficial	Beneficial	Agree Somewhat	Disagree Somewhat	Agree Strongly	Agree Somewhat	Don't Know	Agree Somewhat	Agree Somewhat	Agree Strongly							Familiar With Professional websites		No		More than 2 hours per day	Female	18-30
1		Selected		10		Yes		Internet	Friend/family member			Pet store employee				Consult with a nutritionist or veterinarian	Used a published reference source	Used information from an online resource			Pet store personnel		Somewhat	Not very much	Unnecessary	Harmful	Harmful	Beneficial	Agree Somewhat	Agree Strongly	Agree Strongly	Agree Strongly	Agree Somewhat	Agree Strongly	Agree Strongly	Agree Strongly	Familiar With Association of American Feed Control Officials Publications			Consulted National Research Council: Nutrient Requirements for Dogs and Cats	Familiar With Small Animal Clinical Nutrition, or similar texts for professionals		Familiar With Professional websites		Yes (Please specify)	Feline Nutrition Education Society, Dr Pierson's CatInfo.org, Cat Centric	More than 2 hours per day	Female	51-60
1			Selected		2	Yes		Internet										Used information from an online resource					Somewhat	Somewhat	Unnecessary	Unnecessary	Beneficial	Unnecessary	Agree Somewhat	Agree Strongly	Agree Strongly	Agree Strongly	Agree Somewhat	Agree Strongly	Agree Strongly	Agree Somewhat							Familiar With Professional websites				1-2 hours per day	Female	51-60
1		Selected		1		Yes		Internet						Email group	Book, magazine or other printed source written by a veterinarian other than your own								A little	Not very much	Beneficial	Beneficial	Beneficial	Beneficial	Agree Strongly	Agree Somewhat	Disagree Somewhat	Agree Strongly	Don't Know	Agree Strongly	Agree Strongly	Agree Strongly									No		Less than one hour per day	Female	61 or older
1			Selected		2	Yes		Internet														Decided proportions and composition based on availability	Not very much	Not very much	Harmful	Unnecessary	Beneficial	Beneficial	Agree Strongly	Agree Strongly	Agree Strongly	Agree Strongly	Agree Strongly	Agree Strongly	Agree Strongly	Agree Strongly								Consulted Professional websites			1-2 hours per day	Female	31-40
1		Selected		4		Yes		Internet									Used a published reference source	Used information from an online resource					Not very much	Not very much	Unnecessary	Beneficial	Harmful	Beneficial	Agree Somewhat	Agree Somewhat	Agree Strongly	Agree Strongly	Agree Strongly	Agree Strongly	Agree Strongly	Agree Strongly				Consulted National Research Council: Nutrient Requirements for Dogs and Cats	Familiar With Small Animal Clinical Nutrition, or similar texts for professionals		Familiar With Professional websites				More than 2 hours per day	Female	18-30
1			Selected		2	Yes	Breeder instructions or advice	Internet							Book, magazine or other printed source written by a veterinarian other than your own			Used information from an online resource	Friend/family member	Breeder		Decided proportions and composition based on availability	Somewhat	Somewhat	Unnecessary	Unnecessary	Beneficial	Unnecessary	Agree Somewhat	Agree Somewhat	Agree Somewhat	Agree Somewhat	Disagree Somewhat	Agree Strongly	Agree Strongly	Agree Strongly									No		More than 2 hours per day	Female	51-60
1		Selected		2		Yes		Internet															Somewhat	Not very much	Unnecessary	Beneficial	Beneficial	Beneficial	Agree Strongly	Disagree Somewhat	Agree Strongly	Agree Somewhat	Agree Strongly	Agree Strongly	Don't Know	Don't Know	Familiar With Association of American Feed Control Officials Publications		Familiar With National Research Council: Nutrient Requirements for Dogs and Cats				Familiar With Professional websites	Consulted Professional websites	Yes (Please specify)	IBD KITTIES AND CAT CENTRIC	1-2 hours per day	Female	31-40
1		Selected	Selected	2	1	Yes		Internet				Pet store employee						Used information from an online resource					Somewhat	A little	Beneficial	Beneficial	Beneficial	Beneficial	Agree Somewhat	Agree Somewhat	Agree Somewhat	Agree Somewhat	Agree Somewhat	Agree Strongly	Agree Somewhat	Agree Somewhat									No		More than 2 hours per day	Female	31-40
1			Selected		2	Yes			Friend/family member														Very much	Very much	Beneficial	Beneficial	Beneficial	Beneficial	Disagree Somewhat	Agree Somewhat	Agree Somewhat	Agree Somewhat	Don't Know	Don't Know	Agree Strongly	Agree Strongly									No		1-2 hours per day	Female	18-30
1			Selected		1	Yes		Internet	Friend/family member	Magazine			My veterinarian	Email group	Book, magazine or other printed source written by a veterinarian other than your own								Very much	Very much	Beneficial	Beneficial	Beneficial	Beneficial	Agree Somewhat	Agree Somewhat	Agree Somewhat	Agree Somewhat	Disagree Somewhat	Disagree Strongly	Agree Strongly	Agree Strongly		Consulted Association of American Feed Control Officials Publications	Familiar With National Research Council: Nutrient Requirements for Dogs and Cats			Consulted Small Animal Clinical Nutrition, or similar texts for professionals	Familiar With Professional websites		No		More than 2 hours per day	Female	31-40
1			Selected		1	Yes								Email group				Used information from an online resource					A little	Somewhat		Harmful	Harmful	Harmful	Agree Strongly	Agree Somewhat	Agree Strongly	Agree Strongly	Disagree Strongly	Disagree Strongly	Agree Strongly								Familiar With Professional websites				1-2 hours per day	Male	41-50
1		Selected		3		Yes		Internet	Friend/family member				My veterinarian										Very much	Very much	Beneficial	Beneficial	Beneficial	Beneficial	Disagree Strongly	Disagree Somewhat	Agree Strongly	Agree Strongly	Disagree Strongly	Disagree Strongly	Agree Strongly	Agree Strongly	Familiar With Association of American Feed Control Officials Publications		Familiar With National Research Council: Nutrient Requirements for Dogs and Cats		Familiar With Small Animal Clinical Nutrition, or similar texts for professionals				No		1-2 hours per day	Female	18-30
1		Selected		14		Yes		Internet															Very much	Very much	Beneficial	Beneficial	Beneficial	Beneficial	Disagree Somewhat	Agree Strongly	Agree Strongly	Agree Strongly	Disagree Strongly	Disagree Strongly	Agree Strongly	Agree Strongly		Consulted Association of American Feed Control Officials Publications			Familiar With Small Animal Clinical Nutrition, or similar texts for professionals			Consulted Professional websites	No		More than 2 hours per day	Male	61 or older
1			Selected		1	Yes	Breeder instructions or advice	Internet	Friend/family member	Magazine					Book, magazine or other printed source written by a veterinarian other than your own	Consult with a nutritionist or veterinarian	Used a published reference source	Used information from an online resource			Pet store personnel		Somewhat	Not very much	Beneficial	Beneficial	Beneficial	Beneficial	Agree Somewhat	Agree Somewhat	Agree Strongly	Agree Somewhat	Agree Somewhat	Agree Strongly	Agree Strongly	Agree Strongly											1-2 hours per day	Female	18-30
1		Selected		4		Yes	Breeder instructions or advice	Internet								Consult with a nutritionist or veterinarian	Used a published reference source	Used information from an online resource		Breeder			Very much	A little	Beneficial	Beneficial	Beneficial	Beneficial	Agree Strongly	Agree Strongly	Agree Strongly	Agree Strongly	Agree Strongly	Agree Strongly	Agree Strongly	Agree Strongly					Familiar With Small Animal Clinical Nutrition, or similar texts for professionals		Familiar With Professional websites		No		More than 2 hours per day	Female	51-60
1			Selected		3	Yes			Friend/family member								Used a published reference source	Used information from an online resource	Friend/family member				A little	Not very much	Unnecessary	Harmful	Harmful	Beneficial	Agree Somewhat	Agree Strongly	Agree Strongly	Agree Somewhat	Disagree Somewhat	Don't Know	Agree Strongly	Agree Somewhat	Familiar With Association of American Feed Control Officials Publications								No		1-2 hours per day	Female	61 or older
1		Selected		8		Yes		Internet	Friend/family member									Used information from an online resource	Friend/family member				Somewhat	Not very much	Unnecessary	Beneficial	Beneficial	Beneficial	Agree Somewhat	Agree Somewhat	Agree Strongly	Agree Strongly	Agree Strongly	Agree Strongly	Agree Strongly	Agree Strongly	Familiar With Association of American Feed Control Officials Publications		Familiar With National Research Council: Nutrient Requirements for Dogs and Cats		Familiar With Small Animal Clinical Nutrition, or similar texts for professionals		Familiar With Professional websites		Yes (Please specify)	Holistic vets who have the same integrative care philosophy as me	More than 2 hours per day	Female	51-60
1		Selected		3		Yes		Internet					My veterinarian		Book, magazine or other printed source written by a veterinarian other than your own	Consult with a nutritionist or veterinarian		Used information from an online resource					Somewhat	Not very much	Beneficial	Beneficial	Beneficial	Unnecessary	Agree Strongly	Agree Strongly	Agree Strongly	Agree Strongly	Disagree Somewhat	Agree Strongly	Agree Strongly	Agree Strongly									Yes (Please specify)	Catininfo.org	Less than one hour per day	Female	51-60
1			Selected		2	Yes		Internet	Friend/family member						Book, magazine or other printed source written by a veterinarian other than your own		Used a published reference source	Used information from an online resource	Friend/family member				Somewhat	Not very much	Beneficial	Unnecessary	Unnecessary	Beneficial	Agree Somewhat	Agree Somewhat	Agree Strongly	Agree Strongly	Agree Strongly	Agree Strongly	Agree Strongly	Agree Strongly							Familiar With Professional websites				1-2 hours per day	Female	18-30
1			Selected		7	Yes			Friend/family member									Used information from an online resource	Friend/family member				Very much	Somewhat	Unnecessary	Harmful	Beneficial	Unnecessary	Agree Strongly	Agree Somewhat	Agree Strongly	Agree Somewhat	Agree Somewhat	Agree Strongly	Agree Strongly	Don't Know											1-2 hours per day	Female	51-60
1		Selected	Selected	4	1	Yes		Internet					My veterinarian			Consult with a nutritionist or veterinarian	Used a published reference source	Used information from an online resource					Somewhat	Not very much	Harmful	Harmful	Harmful	Beneficial	Agree Strongly	Agree Strongly	Agree Strongly	Agree Strongly	Agree Somewhat	Agree Strongly	Agree Strongly	Agree Strongly	Familiar With Association of American Feed Control Officials Publications		Familiar With National Research Council: Nutrient Requirements for Dogs and Cats		Familiar With Small Animal Clinical Nutrition, or similar texts for professionals		Familiar With Professional websites		No		1-2 hours per day	Female	18-30
1		Selected	Selected	2	1	Yes		Internet									Used a published reference source	Used information from an online resource				Decided proportions and composition based on availability	Somewhat	Somewhat	Unnecessary	Unnecessary	Beneficial	Unnecessary	Disagree Somewhat	Agree Somewhat	Agree Strongly	Agree Somewhat	Disagree Somewhat	Disagree Somewhat	Agree Strongly	Agree Strongly		Consulted Association of American Feed Control Officials Publications		Consulted National Research Council: Nutrient Requirements for Dogs and Cats		Consulted Small Animal Clinical Nutrition, or similar texts for professionals		Consulted Professional websites			More than 2 hours per day	Female	31-40
1			Selected		2	Yes	Breeder instructions or advice	Internet	Friend/family member	Magazine	Book		My veterinarian		Book, magazine or other printed source written by a veterinarian other than your own	Consult with a nutritionist or veterinarian	Used a published reference source	Used information from an online resource	Friend/family member	Breeder			Very much	Somewhat	Beneficial	Beneficial	Beneficial	Beneficial	Agree Somewhat	Agree Somewhat	Agree Strongly	Agree Somewhat	Agree Somewhat	Agree Somewhat	Agree Strongly	Agree Strongly	Familiar With Association of American Feed Control Officials Publications		Familiar With National Research Council: Nutrient Requirements for Dogs and Cats		Familiar With Small Animal Clinical Nutrition, or similar texts for professionals	Consulted Small Animal Clinical Nutrition, or similar texts for professionals	Familiar With Professional websites	Consulted Professional websites	Yes (Please specify)	nutrition notes from veterinary school	1-2 hours per day	Female	18-30
1		Selected		1		Yes		Internet										Used information from an online resource					Somewhat	Not very much	Beneficial	Beneficial	Beneficial	Unnecessary	Agree Somewhat	Agree Somewhat	Agree Strongly	Agree Strongly	Disagree Strongly	Agree Strongly	Agree Strongly	Agree Strongly									No		More than 2 hours per day	Female	31-40
1		Selected	Selected	2	5	Yes	Breeder instructions or advice										Used a published reference source	Used information from an online resource	Friend/family member	Breeder		Decided proportions and composition based on availability	Somewhat	Somewhat	Beneficial	Beneficial	Beneficial	Beneficial	Agree Strongly	Agree Strongly	Agree Strongly	Agree Strongly	Agree Somewhat	Agree Somewhat	Agree Strongly	Agree Strongly	Familiar With Association of American Feed Control Officials Publications		Familiar With National Research Council: Nutrient Requirements for Dogs and Cats		Familiar With Small Animal Clinical Nutrition, or similar texts for professionals		Familiar With Professional websites		Yes (Please specify)		More than 2 hours per day	Female	51-60
1			Selected		3	Yes			Friend/family member								Used a published reference source						Very much	Not very much	Beneficial	Beneficial	Beneficial	Beneficial	Agree Strongly	Agree Strongly	Agree Strongly	Agree Strongly	Disagree Somewhat	Disagree Somewhat	Agree Strongly	Agree Strongly									No		1-2 hours per day	Female	51-60
1		Selected	Selected	1	3	Yes		Internet										Used information from an online resource					Somewhat	Not very much	Beneficial	Beneficial	Beneficial	Beneficial	Agree Somewhat	Disagree Somewhat	Don't Know	Disagree Somewhat	Agree Somewhat	Don't Know	Agree Strongly	Agree Somewhat	Familiar With Association of American Feed Control Officials Publications		Familiar With National Research Council: Nutrient Requirements for Dogs and Cats		Familiar With Small Animal Clinical Nutrition, or similar texts for professionals		Familiar With Professional websites	Consulted Professional websites	No		Less than one hour per day	Male	18-30
1			Selected		1	Yes		Internet	Friend/family member	Magazine							Used a published reference source		Friend/family member				Somewhat	Not very much	Unnecessary	Beneficial	Unnecessary	Unnecessary	Disagree Somewhat	Agree Somewhat	Agree Strongly	Agree Strongly	Disagree Somewhat	Disagree Somewhat	Agree Strongly	Agree Somewhat							Familiar With Professional websites		Yes (Please specify)	Book - "Unlocking the Canine Ancestral Diet"	1-2 hours per day	Female	61 or older
1			Selected		2	Yes							My veterinarian			Consult with a nutritionist or veterinarian							Somewhat	Somewhat	Beneficial	Beneficial	Beneficial	Beneficial	Agree Somewhat	Agree Somewhat	Agree Strongly	Agree Strongly	Agree Somewhat	Agree Strongly	Agree Strongly	Agree Strongly	Familiar With Association of American Feed Control Officials Publications		Familiar With National Research Council: Nutrient Requirements for Dogs and Cats				Familiar With Professional websites		No		1-2 hours per day	Female	61 or older
1		Selected	Selected	6	2	Yes					Book												Somewhat	Not very much	Beneficial	Beneficial	Beneficial	Beneficial	Agree Strongly	Agree Strongly	Agree Strongly	Agree Strongly	Agree Somewhat	Agree Somewhat	Agree Strongly	Agree Somewhat	Familiar With Association of American Feed Control Officials Publications	Consulted Association of American Feed Control Officials Publications			Familiar With Small Animal Clinical Nutrition, or similar texts for professionals	Consulted Small Animal Clinical Nutrition, or similar texts for professionals	Familiar With Professional websites	Consulted Professional websites	Yes (Please specify)	American Association of Feline Practitioners	1-2 hours per day	Female	41-50
1		Selected		2		Yes		Internet															Very much	Very much	Beneficial	Unnecessary	Unnecessary	Unnecessary	Agree Strongly	Agree Strongly	Agree Strongly	Agree Strongly	Disagree Somewhat	Agree Strongly	Agree Strongly	Don't Know											1-2 hours per day	Female	31-40
1		Selected	Selected	4	3	Yes		Internet															Very much	Very much	Beneficial	Beneficial	Beneficial	Beneficial	Disagree Strongly	Agree Somewhat	Agree Somewhat	Agree Somewhat	Don't Know	Don't Know	Agree Strongly	Agree Strongly	Familiar With Association of American Feed Control Officials Publications		Familiar With National Research Council: Nutrient Requirements for Dogs and Cats				Familiar With Professional websites		No		1-2 hours per day	Female	41-50
1			Selected		2	Yes			Friend/family member														Somewhat	Somewhat	Beneficial	Beneficial	Beneficial	Beneficial	Agree Somewhat	Agree Somewhat	Agree Strongly	Agree Strongly	Disagree Strongly	Agree Strongly	Agree Strongly	Don't Know					Familiar With Small Animal Clinical Nutrition, or similar texts for professionals		Familiar With Professional websites		No		1-2 hours per day	Female	41-50
1		Selected	Selected	2	1	Yes		Internet								Consult with a nutritionist or veterinarian							Very much	Somewhat	Beneficial	Beneficial	Beneficial	Beneficial	Agree Strongly	Agree Strongly	Agree Strongly	Agree Strongly	Disagree Somewhat	Agree Somewhat	Agree Strongly	Agree Strongly		Consulted Association of American Feed Control Officials Publications		Consulted National Research Council: Nutrient Requirements for Dogs and Cats		Consulted Small Animal Clinical Nutrition, or similar texts for professionals		Consulted Professional websites			More than 2 hours per day	Female	31-40
1		Selected	Selected	2	1	Yes			Friend/family member														Very much	Very much	Beneficial	Beneficial	Beneficial	Beneficial	Agree Somewhat	Agree Somewhat	Agree Somewhat	Agree Somewhat	Don't Know	Disagree Somewhat	Agree Somewhat	Agree Somewhat	Familiar With Association of American Feed Control Officials Publications		Familiar With National Research Council: Nutrient Requirements for Dogs and Cats		Familiar With Small Animal Clinical Nutrition, or similar texts for professionals		Familiar With Professional websites		No		More than 2 hours per day	Female	18-30
1			Selected		10	Yes	Breeder instructions or advice	Internet		Magazine	Book			Email group	Book, magazine or other printed source written by a veterinarian other than your own								Very much	Somewhat	Beneficial	Beneficial	Beneficial	Beneficial	Agree Strongly	Agree Strongly	Agree Strongly	Agree Strongly	Agree Strongly	Agree Strongly	Agree Strongly	Agree Strongly	Familiar With Association of American Feed Control Officials Publications		Familiar With National Research Council: Nutrient Requirements for Dogs and Cats		Familiar With Small Animal Clinical Nutrition, or similar texts for professionals			Consulted Professional websites	Yes (Please specify)	Dog Food Adviser, Whole Dog Journal Review Of Dog Foods	1-2 hours per day	Female	51-60
1			Selected		1	Yes		Internet								Consult with a nutritionist or veterinarian		Used information from an online resource					Very much	Somewhat	Beneficial	Beneficial	Beneficial	Beneficial	Agree Somewhat	Agree Somewhat	Agree Strongly	Agree Somewhat	Disagree Somewhat	Agree Strongly	Agree Strongly	Agree Strongly									Yes (Please specify)	Www.cachorroverde.com.br	More than 2 hours per day	Female	31-40
1			Selected		1	Yes									Book, magazine or other printed source written by a veterinarian other than your own								Very much	Somewhat	Beneficial	Beneficial	Beneficial	Beneficial		Agree Strongly	Agree Strongly	Agree Strongly	Agree Somewhat	Agree Somewhat	Don't Know	Don't Know	Familiar With Association of American Feed Control Officials Publications		Familiar With National Research Council: Nutrient Requirements for Dogs and Cats		Familiar With Small Animal Clinical Nutrition, or similar texts for professionals		Familiar With Professional websites		No		More than 2 hours per day	Female	51-60
1		Selected		2		Yes							My veterinarian										Very much	Very much	Beneficial	Beneficial	Beneficial	Beneficial	Disagree Somewhat	Agree Somewhat	Agree Somewhat	Agree Strongly	Agree Somewhat	Agree Somewhat	Agree Strongly	Agree Strongly	Familiar With Association of American Feed Control Officials Publications	Consulted Association of American Feed Control Officials Publications			Familiar With Small Animal Clinical Nutrition, or similar texts for professionals		Familiar With Professional websites		Yes (Please specify)	Purina Website	More than 2 hours per day	Female	18-30
1			Selected		2	Yes	Breeder instructions or advice																Very much	Very much	Beneficial	Beneficial	Beneficial	Beneficial	Disagree Strongly	Disagree Strongly	Agree Strongly	Agree Somewhat	Disagree Somewhat	Disagree Strongly	Disagree Somewhat	Don't Know	Familiar With Association of American Feed Control Officials Publications	Consulted Association of American Feed Control Officials Publications	Familiar With National Research Council: Nutrient Requirements for Dogs and Cats	Consulted National Research Council: Nutrient Requirements for Dogs and Cats	Familiar With Small Animal Clinical Nutrition, or similar texts for professionals	Consulted Small Animal Clinical Nutrition, or similar texts for professionals	Familiar With Professional websites	Consulted Professional websites	Yes (Please specify)	Board certified Veterinary nutritionist	More than 2 hours per day	Female	31-40
1		Selected	Selected	2	1	Yes							My veterinarian			Consult with a nutritionist or veterinarian						Decided proportions and composition based on availability	Very much	Somewhat	Beneficial	Beneficial	Beneficial	Beneficial	Agree Somewhat	Agree Somewhat	Agree Strongly	Agree Somewhat	Disagree Strongly	Agree Strongly	Agree Strongly	Agree Strongly	Familiar With Association of American Feed Control Officials Publications		Familiar With National Research Council: Nutrient Requirements for Dogs and Cats						No		1-2 hours per day	Male	51-60
1		Selected	Selected	1	2	Yes	Breeder instructions or advice	Internet	Friend/family member		Book						Used a published reference source	Used information from an online resource	Friend/family member	Breeder			Somewhat	Not very much	Unnecessary	Unnecessary	Beneficial	Beneficial	Agree Somewhat	Agree Somewhat	Agree Strongly	Agree Somewhat	Disagree Somewhat	Agree Somewhat	Don't Know	Don't Know							Familiar With Professional websites				More than 2 hours per day	Female	31-40
1			Selected		2	Yes		Internet															Somewhat	Somewhat	Beneficial	Unnecessary	Unnecessary	Beneficial	Agree Somewhat	Disagree Somewhat	Agree Strongly	Agree Somewhat	Disagree Somewhat	Disagree Somewhat	Agree Strongly	Agree Strongly							Familiar With Professional websites		No		More than 2 hours per day	Male	31-40
1		Selected	Selected	1	1	Yes			Friend/family member										Friend/family member				Somewhat	Not very much	Beneficial	Beneficial	Beneficial	Beneficial	Agree Strongly	Agree Somewhat	Agree Strongly	Agree Strongly	Disagree Somewhat	Agree Somewhat	Agree Strongly	Disagree Strongly									No		More than 2 hours per day	Female	51-60
1		Selected	Selected	1	10	Yes		Internet								Consult with a nutritionist or veterinarian	Used a published reference source	Used information from an online resource	Friend/family member				Very much	Not very much	Beneficial	Beneficial	Beneficial	Beneficial	Agree Strongly	Agree Strongly	Agree Strongly	Agree Strongly	Disagree Somewhat	Agree Somewhat	Agree Strongly	Agree Strongly	Familiar With Association of American Feed Control Officials Publications			Consulted National Research Council: Nutrient Requirements for Dogs and Cats		Consulted Small Animal Clinical Nutrition, or similar texts for professionals	Familiar With Professional websites		Yes (Please specify)	My own results!	1-2 hours per day	Female	41-50
1		Selected	Selected	1	2	Yes									Book, magazine or other printed source written by a veterinarian other than your own	Consult with a nutritionist or veterinarian							Somewhat	Not very much	Unnecessary	Harmful	Beneficial	Beneficial	Agree Strongly	Agree Strongly	Agree Strongly	Agree Strongly	Agree Somewhat	Agree Strongly	Agree Strongly	Agree Strongly	Familiar With Association of American Feed Control Officials Publications		Familiar With National Research Council: Nutrient Requirements for Dogs and Cats		Familiar With Small Animal Clinical Nutrition, or similar texts for professionals		Familiar With Professional websites		Yes (Please specify)	Holistic lecturer and Holistic vet	1-2 hours per day	Female	61 or older
1			Selected		1	Yes																Decided proportions and composition based on availability	Very much	Somewhat	Beneficial	Beneficial	Beneficial	Beneficial	Agree Somewhat	Agree Somewhat	Agree Somewhat	Agree Somewhat	Disagree Somewhat	Disagree Somewhat	Agree Strongly	Agree Somewhat	Familiar With Association of American Feed Control Officials Publications		Familiar With National Research Council: Nutrient Requirements for Dogs and Cats		Familiar With Small Animal Clinical Nutrition, or similar texts for professionals	Consulted Small Animal Clinical Nutrition, or similar texts for professionals	Familiar With Professional websites		No		1-2 hours per day	Female	18-30
1		Selected	Selected	2	2	Yes							My veterinarian			Consult with a nutritionist or veterinarian		Used information from an online resource					Somewhat	Somewhat	Unnecessary	Unnecessary	Unnecessary	Beneficial	Agree Strongly	Agree Strongly	Agree Strongly	Agree Strongly	Agree Strongly	Agree Strongly	Agree Strongly	Agree Strongly											More than 2 hours per day	Female	51-60
1			Selected		4	Yes		Internet				Pet store employee				Consult with a nutritionist or veterinarian	Used a published reference source				Pet store personnel		Not very much	Not very much	Harmful	Harmful	Harmful	Unnecessary	Agree Strongly	Agree Somewhat	Agree Strongly	Agree Strongly	Agree Somewhat	Agree Strongly	Agree Strongly	Agree Strongly	Familiar With Association of American Feed Control Officials Publications		Familiar With National Research Council: Nutrient Requirements for Dogs and Cats						No		1-2 hours per day	Male	51-60
1		Selected		1		Yes		Internet										Used information from an online resource					Somewhat	Not very much	Unnecessary	Unnecessary	Unnecessary	Beneficial	Agree Strongly	Agree Strongly	Agree Strongly	Agree Strongly	Agree Somewhat	Agree Strongly	Agree Strongly	Agree Somewhat											1-2 hours per day	Female	41-50
1		Selected		2		No																	Very much	Very much	Beneficial	Beneficial	Beneficial	Beneficial	Agree Strongly	Agree Somewhat	Agree Somewhat	Agree Somewhat	Agree Somewhat	Don't Know	Agree Strongly	Agree Strongly											1-2 hours per day	Female	51-60
1		Selected	Selected	1	4	Yes			Friend/family member									Used information from an online resource	Friend/family member	Breeder			A little	Not very much	Unnecessary	Unnecessary	Beneficial	Beneficial	Agree Strongly	Agree Strongly	Agree Strongly	Agree Strongly	Agree Somewhat	Agree Strongly	Agree Strongly	Agree Strongly	Familiar With Association of American Feed Control Officials Publications		Familiar With National Research Council: Nutrient Requirements for Dogs and Cats								More than 2 hours per day	Female	31-40
1		Selected	Selected	1	1	Yes		Internet															Very much	Very much	Beneficial	Beneficial	Beneficial	Beneficial	Agree Somewhat	Agree Somewhat	Agree Strongly	Agree Strongly	Agree Somewhat	Agree Somewhat	Agree Strongly	Agree Strongly									No		1-2 hours per day	Female	31-40
1			Selected		2	Yes									Book, magazine or other printed source written by a veterinarian other than your own								Very much	Very much	Beneficial	Beneficial	Beneficial	Beneficial	Agree Somewhat	Agree Strongly	Agree Strongly	Agree Strongly	Agree Somewhat	Disagree Somewhat	Agree Strongly	Agree Strongly	Familiar With Association of American Feed Control Officials Publications		Familiar With National Research Council: Nutrient Requirements for Dogs and Cats		Familiar With Small Animal Clinical Nutrition, or similar texts for professionals	Consulted Small Animal Clinical Nutrition, or similar texts for professionals	Familiar With Professional websites	Consulted Professional websites	Yes (Please specify)	Cornell Veterinary School Nutrition Course	1-2 hours per day	Female	18-30
1		Selected	Selected	1	4	Yes		Internet			Book			Email group	Book, magazine or other printed source written by a veterinarian other than your own	Consult with a nutritionist or veterinarian						Decided proportions and composition based on availability	Not very much	Not very much	Harmful	Harmful	Harmful	Beneficial	Agree Strongly	Agree Strongly	Agree Strongly	Agree Strongly	Agree Strongly	Agree Strongly	Agree Strongly	Agree Somewhat	Familiar With Association of American Feed Control Officials Publications		Familiar With National Research Council: Nutrient Requirements for Dogs and Cats		Familiar With Small Animal Clinical Nutrition, or similar texts for professionals		Familiar With Professional websites		Yes (Please specify)	My textbooks as natural healer	More than 2 hours per day	Female	51-60
1			Selected		2	Yes	Breeder instructions or advice										Used a published reference source			Breeder			Very much	Somewhat	Beneficial	Beneficial	Beneficial	Beneficial	Agree Strongly	Agree Strongly	Agree Strongly	Agree Strongly	Don't Know	Agree Somewhat	Agree Strongly	Agree Strongly			Familiar With National Research Council: Nutrient Requirements for Dogs and Cats				Familiar With Professional websites		No		More than 2 hours per day	Female	18-30
1		Selected	Selected	1	1	Yes		Internet						Email group	Book, magazine or other printed source written by a veterinarian other than your own		Used a published reference source	Used information from an online resource	Friend/family member				Very much	Not very much	Beneficial	Beneficial	Beneficial	Beneficial	Agree Somewhat	Agree Somewhat	Agree Strongly	Agree Somewhat	Agree Strongly	Agree Strongly	Agree Strongly	Don't Know	Familiar With Association of American Feed Control Officials Publications						Familiar With Professional websites				More than 2 hours per day	Female	18-30
1			Selected		2	Yes	Breeder instructions or advice	Internet	Friend/family member	Magazine	Book	Pet store employee			Book, magazine or other printed source written by a veterinarian other than your own								Somewhat	Not very much	Beneficial	Beneficial	Beneficial	Beneficial	Disagree Strongly	Agree Somewhat	Agree Strongly	Agree Strongly	Disagree Strongly	Disagree Strongly	Agree Strongly	Agree Strongly	Familiar With Association of American Feed Control Officials Publications	Consulted Association of American Feed Control Officials Publications	Familiar With National Research Council: Nutrient Requirements for Dogs and Cats	Consulted National Research Council: Nutrient Requirements for Dogs and Cats	Familiar With Small Animal Clinical Nutrition, or similar texts for professionals		Familiar With Professional websites		Yes (Please specify)	Monica Segal's books.	More than 2 hours per day	Female	31-40
1			Selected		3	Yes		Internet							Book, magazine or other printed source written by a veterinarian other than your own			Used information from an online resource					Somewhat	Not very much	Unnecessary	Harmful	Beneficial	Beneficial	Agree Strongly	Agree Strongly	Agree Strongly	Agree Strongly	Agree Strongly	Agree Strongly	Agree Strongly	Agree Strongly							Familiar With Professional websites	Consulted Professional websites	No		More than 2 hours per day	Female	51-60
1			Selected		3	Yes		Internet			Book			Email group	Book, magazine or other printed source written by a veterinarian other than your own	Consult with a nutritionist or veterinarian		Used information from an online resource					Somewhat	Not very much	Unnecessary	Unnecessary	Unnecessary	Beneficial	Agree Strongly	Agree Strongly	Agree Somewhat	Agree Somewhat	Agree Somewhat	Agree Somewhat	Agree Strongly	Agree Strongly	Familiar With Association of American Feed Control Officials Publications		Familiar With National Research Council: Nutrient Requirements for Dogs and Cats		Familiar With Small Animal Clinical Nutrition, or similar texts for professionals		Familiar With Professional websites		Yes (Please specify)	Books	1-2 hours per day	Female	41-50
1			Selected		3	Yes		Internet										Used information from an online resource	Friend/family member				Somewhat	Somewhat	Unnecessary	Beneficial	Beneficial	Beneficial	Agree Somewhat	Disagree Somewhat	Agree Strongly	Agree Somewhat	Disagree Somewhat	Don't Know	Agree Strongly	Agree Strongly											1-2 hours per day	Female	18-30
1			Selected		2	Yes			Friend/family member		Book		My veterinarian						Friend/family member				Somewhat	Somewhat	Beneficial	Beneficial	Beneficial	Beneficial	Agree Strongly	Agree Strongly	Agree Somewhat	Agree Somewhat	Agree Somewhat	Don't Know	Agree Strongly	Agree Strongly		Consulted Association of American Feed Control Officials Publications		Consulted National Research Council: Nutrient Requirements for Dogs and Cats	Familiar With Small Animal Clinical Nutrition, or similar texts for professionals		Familiar With Professional websites		Yes (Please specify)	books by Monica Segal and Dr Doods	More than 2 hours per day	Female	41-50
1			Selected		3	Yes			Friend/family member				My veterinarian			Consult with a nutritionist or veterinarian		Used information from an online resource					Somewhat	A little	Unnecessary	Harmful	Unnecessary	Unnecessary	Agree Strongly	Agree Somewhat	Agree Strongly	Agree Strongly	Disagree Somewhat	Agree Somewhat	Agree Strongly	Agree Strongly						Consulted Small Animal Clinical Nutrition, or similar texts for professionals		Consulted Professional websites	Yes (Please specify)	my veterinarian	More than 2 hours per day	Female	31-40
1			Selected		1	Yes		Internet			Book		My veterinarian	Email group				Used information from an online resource					Somewhat	Not very much	Beneficial	Beneficial	Beneficial	Beneficial	Agree Strongly	Agree Strongly	Agree Strongly	Agree Strongly	Agree Somewhat	Agree Strongly	Agree Strongly	Agree Strongly						Consulted Small Animal Clinical Nutrition, or similar texts for professionals					More than 2 hours per day	Male	41-50
1			Selected		1	No																	Very much	Somewhat	Beneficial	Beneficial	Beneficial	Beneficial	Don't Know	Agree Somewhat	Agree Somewhat	Agree Somewhat	Don't Know	Don't Know	Agree Strongly	Agree Somewhat									No		1-2 hours per day	Male	31-40
1		Selected	Selected	3	1	Yes			Friend/family member										Friend/family member	Breeder			A little	Not very much	Harmful	Unnecessary	Unnecessary	Unnecessary	Agree Somewhat	Agree Somewhat	Agree Strongly	Agree Somewhat	Agree Strongly	Agree Somewhat	Agree Strongly	Agree Somewhat	Familiar With Association of American Feed Control Officials Publications		Familiar With National Research Council: Nutrient Requirements for Dogs and Cats						Yes (Please specify)	Raw and Natural Nutrition for Dogs	More than 2 hours per day	Female	61 or older
1		Selected	Selected	2	6	Yes			Friend/family member							Consult with a nutritionist or veterinarian	Used a published reference source	Used information from an online resource	Friend/family member			Decided proportions and composition based on availability	A little	Not very much	Beneficial	Harmful	Harmful	Beneficial	Agree Strongly	Agree Strongly	Agree Strongly	Agree Strongly	Disagree Somewhat	Agree Somewhat	Agree Strongly	Agree Strongly	Familiar With Association of American Feed Control Officials Publications		Familiar With National Research Council: Nutrient Requirements for Dogs and Cats	Consulted National Research Council: Nutrient Requirements for Dogs and Cats	Familiar With Small Animal Clinical Nutrition, or similar texts for professionals		Familiar With Professional websites	Consulted Professional websites	Yes (Please specify)	The journal of nutrition	1-2 hours per day	Female	41-50
1		Selected	Selected	4	1	Yes	Breeder instructions or advice																Very much	Very much	Beneficial	Beneficial	Beneficial	Beneficial	Agree Strongly	Agree Strongly	Agree Strongly	Agree Strongly	Agree Somewhat	Agree Somewhat	Agree Strongly	Agree Strongly							Familiar With Professional websites	Consulted Professional websites			More than 2 hours per day	Female	31-40
1		Selected	Selected	1	1	Yes		Internet									Used a published reference source	Used information from an online resource				Decided proportions and composition based on availability	Very much	Not very much	Unnecessary	Harmful	Harmful	Beneficial	Agree Strongly	Agree Somewhat	Agree Strongly	Agree Somewhat	Don't Know	Agree Strongly	Agree Strongly	Agree Strongly	Familiar With Association of American Feed Control Officials Publications						Familiar With Professional websites				1-2 hours per day	Female	18-30
1			Selected		2	Yes		Internet															Very much	Somewhat	Beneficial	Beneficial	Beneficial	Beneficial	Disagree Strongly	Agree Somewhat	Agree Strongly	Agree Somewhat	Don't Know	Don't Know	Agree Strongly	Agree Somewhat	Familiar With Association of American Feed Control Officials Publications	Consulted Association of American Feed Control Officials Publications	Familiar With National Research Council: Nutrient Requirements for Dogs and Cats	Consulted National Research Council: Nutrient Requirements for Dogs and Cats	Familiar With Small Animal Clinical Nutrition, or similar texts for professionals		Familiar With Professional websites		No		1-2 hours per day	Female	18-30
1		Selected		2		Yes		Internet							Book, magazine or other printed source written by a veterinarian other than your own		Used a published reference source	Used information from an online resource					Somewhat	Not very much	Unnecessary	Harmful	Beneficial	Beneficial	Agree Strongly	Agree Strongly	Agree Strongly	Agree Strongly	Agree Strongly	Agree Strongly	Agree Strongly	Agree Strongly									Yes (Please specify)	Young Again Pet Food Company	More than 2 hours per day	Female	41-50
1			Selected		2	Yes		Internet									Used a published reference source	Used information from an online resource					Somewhat	Not very much	Unnecessary	Beneficial	Beneficial	Beneficial	Agree Strongly	Agree Somewhat	Don't Know	Agree Strongly	Agree Strongly	Don't Know	Don't Know	Don't Know							Familiar With Professional websites		No		1-2 hours per day	Female	18-30
1		Selected	Selected	1	4	Yes			Friend/family member		Book			Email group		Consult with a nutritionist or veterinarian	Used a published reference source		Friend/family member				Very much	Somewhat	Unnecessary	Beneficial	Beneficial	Beneficial	Agree Strongly	Agree Somewhat	Agree Strongly	Agree Somewhat	Agree Somewhat	Agree Strongly	Agree Strongly	Agree Strongly											More than 2 hours per day	Female	31-40
1		Selected		1		Yes		Internet				Pet store employee											Very much	Very much	Beneficial	Beneficial	Beneficial	Beneficial	Disagree Somewhat	Disagree Somewhat	Agree Strongly	Agree Strongly	Disagree Somewhat	Disagree Strongly	Agree Strongly	Agree Somewhat	Familiar With Association of American Feed Control Officials Publications	Consulted Association of American Feed Control Officials Publications	Familiar With National Research Council: Nutrient Requirements for Dogs and Cats	Consulted National Research Council: Nutrient Requirements for Dogs and Cats	Familiar With Small Animal Clinical Nutrition, or similar texts for professionals	Consulted Small Animal Clinical Nutrition, or similar texts for professionals	Familiar With Professional websites	Consulted Professional websites	No		More than 2 hours per day	Female	18-30
1		Selected		2		Yes		Internet															Very much	Very much	Beneficial	Beneficial	Beneficial	Beneficial	Agree Somewhat	Disagree Somewhat	Disagree Somewhat	Agree Somewhat	Disagree Somewhat	Disagree Somewhat	Agree Strongly	Agree Somewhat	Familiar With Association of American Feed Control Officials Publications		Familiar With National Research Council: Nutrient Requirements for Dogs and Cats			Consulted Small Animal Clinical Nutrition, or similar texts for professionals		Consulted Professional websites	No		More than 2 hours per day	Female	31-40
1			Selected		2	Yes	Breeder instructions or advice		Friend/family member					Email group									Very much	Very much	Beneficial	Beneficial	Beneficial	Unnecessary	Agree Strongly	Agree Somewhat	Agree Strongly	Agree Somewhat	Agree Somewhat	Agree Strongly	Agree Strongly	Agree Strongly	Familiar With Association of American Feed Control Officials Publications		Familiar With National Research Council: Nutrient Requirements for Dogs and Cats			Consulted Small Animal Clinical Nutrition, or similar texts for professionals		Consulted Professional websites	No		1-2 hours per day	Female	31-40
1			Selected		2	Yes		Internet															Somewhat	Somewhat	Beneficial	Beneficial	Beneficial	Beneficial	Disagree Strongly	Agree Somewhat	Agree Somewhat	Disagree Somewhat	Disagree Strongly	Disagree Strongly	Agree Strongly	Agree Strongly	Familiar With Association of American Feed Control Officials Publications		Familiar With National Research Council: Nutrient Requirements for Dogs and Cats		Familiar With Small Animal Clinical Nutrition, or similar texts for professionals		Familiar With Professional websites	Consulted Professional websites	Yes (Please specify)	Dr. Remillard at Petdiets.com	More than 2 hours per day	Female	18-30
1			Selected		2	Yes			Friend/family member							Consult with a nutritionist or veterinarian							Very much	Somewhat	Beneficial	Beneficial	Beneficial	Beneficial	Agree Strongly	Agree Somewhat	Agree Strongly	Agree Somewhat	Agree Somewhat	Agree Somewhat	Agree Strongly	Agree Strongly	Familiar With Association of American Feed Control Officials Publications		Familiar With National Research Council: Nutrient Requirements for Dogs and Cats		Familiar With Small Animal Clinical Nutrition, or similar texts for professionals		Familiar With Professional websites		No		More than 2 hours per day	Female	41-50
1			Selected		2	Yes		Internet								Consult with a nutritionist or veterinarian		Used information from an online resource					Very much	Somewhat	Beneficial	Beneficial	Beneficial	Beneficial	Agree Somewhat	Agree Somewhat	Agree Strongly	Agree Somewhat	Agree Somewhat	Agree Strongly	Agree Somewhat	Agree Somewhat							Familiar With Professional websites		No		More than 2 hours per day	Female	18-30
1		Selected	Selected	5	2	Yes									Book, magazine or other printed source written by a veterinarian other than your own							Decided proportions and composition based on availability	Very much	A little	Unnecessary	Beneficial	Beneficial	Unnecessary	Agree Strongly	Agree Somewhat	Agree Strongly	Agree Strongly	Agree Somewhat	Disagree Somewhat	Agree Strongly	Agree Strongly		Consulted Association of American Feed Control Officials Publications		Consulted National Research Council: Nutrient Requirements for Dogs and Cats		Consulted Small Animal Clinical Nutrition, or similar texts for professionals		Consulted Professional websites	No		More than 2 hours per day	Female	18-30
1		Selected	Selected	3	2	Yes		Internet										Used information from an online resource					Somewhat	Somewhat	Beneficial	Beneficial	Beneficial	Beneficial	Agree Somewhat	Agree Somewhat	Agree Strongly	Agree Strongly	Agree Strongly	Agree Somewhat	Agree Strongly	Agree Somewhat									Yes (Please specify)	catinfo.org	More than 2 hours per day	Female	41-50
1			Selected		1	Yes			Friend/family member								Used a published reference source	Used information from an online resource	Friend/family member				Very much	A little	Beneficial	Beneficial	Beneficial	Beneficial	Agree Strongly	Agree Strongly	Agree Strongly	Agree Strongly	Agree Somewhat	Agree Strongly	Agree Strongly	Agree Strongly	Familiar With Association of American Feed Control Officials Publications		Familiar With National Research Council: Nutrient Requirements for Dogs and Cats		Familiar With Small Animal Clinical Nutrition, or similar texts for professionals		Familiar With Professional websites		No		More than 2 hours per day	Female	18-30
1			Selected		1	No																	A little	Not very much	Harmful	Beneficial	Unnecessary	Beneficial	Agree Strongly	Agree Strongly	Agree Strongly	Agree Strongly	Agree Strongly	Agree Strongly	Agree Strongly	Agree Strongly									No		More than 2 hours per day	Female	31-40
1		Selected	Selected	2	1	Yes			Friend/family member			Pet store employee											Very much	Very much	Beneficial	Beneficial	Beneficial	Beneficial	Agree Strongly	Agree Strongly	Agree Strongly	Agree Strongly	Agree Somewhat	Agree Somewhat	Agree Strongly	Agree Strongly							Familiar With Professional websites		Yes (Please specify)	Board certified vet nutritionists / VIN (husband and I are both vets)	Less than one hour per day	Female	51-60
1			Selected		1	Yes			Friend/family member										Friend/family member				Very much	Somewhat	Beneficial	Unnecessary	Beneficial	Beneficial	Agree Strongly	Agree Strongly	Agree Strongly	Agree Strongly	Agree Somewhat	Agree Somewhat	Agree Strongly	Agree Strongly	Familiar With Association of American Feed Control Officials Publications						Familiar With Professional websites		No		More than 2 hours per day	Female	41-50
1		Selected		2		Yes		Internet							Book, magazine or other printed source written by a veterinarian other than your own		Used a published reference source	Used information from an online resource					Somewhat	Not very much	Unnecessary	Beneficial	Beneficial	Unnecessary	Agree Somewhat	Agree Strongly	Agree Somewhat	Agree Somewhat	Agree Strongly	Agree Strongly	Agree Strongly	Agree Strongly	Familiar With Association of American Feed Control Officials Publications								Yes (Please specify)	Publications written by feline nutritionists	More than 2 hours per day	Female	61 or older
1		Selected		2		Yes		Internet	Friend/family member			Pet store employee				Consult with a nutritionist or veterinarian			Friend/family member			Decided proportions and composition based on availability	Very much	Not very much	Beneficial	Beneficial	Beneficial	Beneficial	Disagree Somewhat	Agree Somewhat	Agree Strongly	Agree Strongly	Disagree Somewhat	Agree Strongly	Agree Strongly	Agree Strongly									No		More than 2 hours per day	Female	18-30
1			Selected		2	Yes	Breeder instructions or advice		Friend/family member											Breeder			Very much	A little	Beneficial	Beneficial	Beneficial	Beneficial	Agree Strongly	Agree Strongly	Agree Strongly	Agree Strongly	Disagree Somewhat	Agree Strongly	Agree Strongly	Agree Strongly									Yes (Please specify)	Show breeders, they are so knowledgable	1-2 hours per day	Female	61 or older
1			Selected		1	Yes		Internet															Very much	Very much	Beneficial	Beneficial	Beneficial	Unnecessary	Disagree Somewhat	Agree Somewhat	Agree Somewhat	Agree Somewhat	Agree Somewhat	Agree Somewhat	Agree Strongly	Agree Strongly									No		1-2 hours per day	Female	31-40
1		Selected		1		No																	A little	Not very much	Beneficial	Beneficial	Beneficial	Unnecessary	Agree Strongly	Agree Somewhat	Agree Strongly	Agree Strongly	Agree Somewhat	Agree Strongly	Agree Strongly	Agree Strongly	Familiar With Association of American Feed Control Officials Publications		Familiar With National Research Council: Nutrient Requirements for Dogs and Cats		Familiar With Small Animal Clinical Nutrition, or similar texts for professionals		Familiar With Professional websites		Yes (Please specify)	nutritionist in Sweden	More than 2 hours per day	Female	41-50
1		Selected	Selected	1	1	Yes	Breeder instructions or advice	Internet	Friend/family member	Magazine		Pet store employee			Book, magazine or other printed source written by a veterinarian other than your own		Used a published reference source	Used information from an online resource	Friend/family member	Breeder		Decided proportions and composition based on availability	Very much	A little	Beneficial	Beneficial	Beneficial	Beneficial	Disagree Somewhat	Agree Somewhat	Agree Strongly	Agree Strongly	Disagree Somewhat	Agree Somewhat	Agree Strongly	Agree Strongly			Familiar With National Research Council: Nutrient Requirements for Dogs and Cats				Familiar With Professional websites		Yes (Please specify)		1-2 hours per day	Female	41-50
1			Selected		2	Yes		Internet			Book			Email group	Book, magazine or other printed source written by a veterinarian other than your own		Used a published reference source	Used information from an online resource				Decided proportions and composition based on availability	Very much	Somewhat	Beneficial	Beneficial	Beneficial	Unnecessary	Agree Somewhat	Agree Somewhat	Agree Somewhat	Agree Somewhat	Disagree Somewhat	Don't Know	Agree Somewhat	Agree Somewhat		Consulted Association of American Feed Control Officials Publications							No		More than 2 hours per day	Female	41-50
1		Selected		5		Yes					Book		My veterinarian			Consult with a nutritionist or veterinarian						Decided proportions and composition based on availability	Very much	Somewhat	Beneficial	Beneficial	Beneficial	Beneficial	Agree Strongly	Agree Strongly	Agree Strongly	Agree Strongly	Agree Somewhat	Agree Somewhat	Agree Strongly	Agree Strongly		Consulted Association of American Feed Control Officials Publications		Consulted National Research Council: Nutrient Requirements for Dogs and Cats		Consulted Small Animal Clinical Nutrition, or similar texts for professionals		Consulted Professional websites	Yes (Please specify)	Steve Brown Ancestral Diets for Dogs, Dr. Karen Becker, Dr. Ihor Basko, Dr.Susan Wynn, Dr. Barbara Fougere.. etc etc etc	1-2 hours per day	Female	51-60
1			Selected		2	Yes							My veterinarian			Consult with a nutritionist or veterinarian				Breeder			Somewhat	Very much	Unnecessary	Beneficial	Beneficial	Beneficial	Agree Strongly	Agree Somewhat	Agree Somewhat	Agree Somewhat		Don't Know	Agree Strongly	Agree Strongly									No		More than 2 hours per day	Female	61 or older
1			Selected		1	No																	Very much	Very much	Beneficial	Beneficial	Beneficial	Beneficial	Agree Strongly	Agree Strongly	Agree Strongly	Agree Strongly	Agree Somewhat	Agree Somewhat	Agree Strongly	Agree Somewhat							Familiar With Professional websites				1-2 hours per day	Female	61 or older
1		Selected	Selected	6	3	Yes		Internet									Used a published reference source	Used information from an online resource					Somewhat	Not very much	Unnecessary	Unnecessary	Beneficial	Beneficial	Disagree Somewhat	Agree Somewhat	Agree Strongly	Don't Know	Agree Strongly	Agree Strongly	Agree Strongly	Agree Strongly	Familiar With Association of American Feed Control Officials Publications		Familiar With National Research Council: Nutrient Requirements for Dogs and Cats		Familiar With Small Animal Clinical Nutrition, or similar texts for professionals			Consulted Professional websites	No		More than 2 hours per day	Female	18-30
1			Selected		2	Yes	Breeder instructions or advice								Book, magazine or other printed source written by a veterinarian other than your own								Somewhat	Somewhat	Beneficial	Beneficial	Beneficial	Beneficial	Agree Somewhat	Agree Strongly	Agree Strongly	Agree Strongly	Agree Somewhat	Agree Somewhat	Agree Strongly	Agree Strongly		Consulted Association of American Feed Control Officials Publications		Consulted National Research Council: Nutrient Requirements for Dogs and Cats		Consulted Small Animal Clinical Nutrition, or similar texts for professionals	Familiar With Professional websites		No		More than 2 hours per day	Female	61 or older
1		Selected	Selected	1	2	Yes					Book		My veterinarian										Somewhat	Somewhat	Beneficial	Beneficial	Beneficial	Beneficial	Agree Strongly	Agree Somewhat	Agree Strongly	Agree Strongly	Disagree Somewhat	Agree Somewhat	Agree Somewhat	Disagree Somewhat								Consulted Professional websites	Yes (Please specify)	books on raw feeding	Less than one hour per day	Female	41-50
1			Selected		1	Yes	Breeder instructions or advice	Internet			Book		My veterinarian		Book, magazine or other printed source written by a veterinarian other than your own	Consult with a nutritionist or veterinarian	Used a published reference source	Used information from an online resource					Somewhat	Somewhat	Beneficial	Beneficial	Beneficial	Beneficial	Agree Strongly	Agree Strongly	Agree Strongly	Agree Strongly	Agree Somewhat	Agree Strongly	Agree Strongly	Agree Strongly								Consulted Professional websites	Yes (Please specify)	Books / verified and recommended websites from various veterinarians that had already a long experience with raw food	More than 2 hours per day	Female	18-30
1		Selected	Selected	3	8	Yes							My veterinarian					Used information from an online resource					Somewhat	Somewhat	Beneficial	Beneficial	Beneficial	Beneficial	Agree Somewhat	Disagree Somewhat	Agree Somewhat	Agree Somewhat	Agree Somewhat	Agree Somewhat	Agree Strongly	Agree Somewhat									No		More than 2 hours per day	Female	51-60
1		Selected	Selected	1	3	Yes			Friend/family member														Very much	Very much	Beneficial	Beneficial	Beneficial	Beneficial	Agree Strongly	Agree Somewhat	Agree Somewhat	Agree Somewhat	Disagree Somewhat	Don't Know	Agree Strongly	Agree Strongly									No		More than 2 hours per day	Female	61 or older
1		Selected	Selected	3	3	Yes	Breeder instructions or advice	Internet	Friend/family member									Used information from an online resource	Friend/family member	Breeder			Somewhat	Not very much	Unnecessary	Unnecessary	Beneficial	Beneficial	Agree Somewhat	Agree Somewhat	Agree Strongly	Agree Somewhat	Agree Strongly	Agree Strongly	Agree Strongly	Disagree Somewhat											1-2 hours per day	Female	31-40
1		Selected	Selected	1	2	Yes									Book, magazine or other printed source written by a veterinarian other than your own			Used information from an online resource					Somewhat	Somewhat	Unnecessary	Harmful	Harmful	Beneficial	Agree Somewhat	Agree Strongly	Agree Strongly	Agree Strongly	Agree Somewhat	Agree Somewhat	Agree Strongly	Don't Know									No		More than 2 hours per day	Female	41-50
1			Selected		2	Yes			Friend/family member										Friend/family member				Very much	A little	Unnecessary	Unnecessary	Unnecessary	Unnecessary	Agree Strongly	Agree Somewhat	Agree Strongly	Agree Strongly	Agree Somewhat	Agree Somewhat	Agree Strongly	Agree Strongly	Familiar With Association of American Feed Control Officials Publications		Familiar With National Research Council: Nutrient Requirements for Dogs and Cats		Familiar With Small Animal Clinical Nutrition, or similar texts for professionals		Familiar With Professional websites		No		1-2 hours per day	Female	61 or older
1			Selected		5	Yes		Internet	Friend/family member									Used information from an online resource	Friend/family member				Somewhat	Somewhat	Beneficial	Beneficial	Beneficial	Beneficial	Disagree Strongly	Disagree Strongly	Agree Strongly	Agree Somewhat	Disagree Strongly	Agree Strongly	Disagree Strongly	Don't Know											More than 2 hours per day	Male	41-50
1		Selected		2		Yes			Friend/family member														Very much	Very much	Beneficial	Beneficial	Beneficial	Beneficial	Disagree Somewhat	Disagree Somewhat	Disagree Somewhat	Disagree Somewhat	Disagree Somewhat	Disagree Somewhat	Agree Somewhat	Agree Somewhat									No		More than 2 hours per day	Female	61 or older
1		Selected	Selected	1	2	Yes		Internet			Book						Used a published reference source	Used information from an online resource					Not very much	Not very much	Beneficial	Beneficial	Beneficial	Beneficial	Agree Strongly	Agree Strongly	Agree Strongly	Agree Strongly	Agree Somewhat	Agree Strongly	Agree Strongly	Agree Strongly												Male	61 or older
1			Selected		2	Yes		Internet	Friend/family member	Magazine	Book			Email group								Decided proportions and composition based on availability	Somewhat	Somewhat	Beneficial	Unnecessary	Beneficial	Beneficial	Agree Strongly	Agree Somewhat	Agree Somewhat	Agree Strongly	Agree Somewhat	Agree Somewhat	Agree Strongly	Agree Strongly	Familiar With Association of American Feed Control Officials Publications								No		More than 2 hours per day	Female	61 or older
1		Selected	Selected	3	2	Yes	Breeder instructions or advice	Internet							Book, magazine or other printed source written by a veterinarian other than your own		Used a published reference source	Used information from an online resource					Somewhat	Somewhat	Unnecessary	Beneficial	Beneficial	Beneficial	Agree Somewhat	Agree Somewhat	Agree Strongly	Agree Strongly	Disagree Somewhat	Agree Somewhat	Agree Strongly	Agree Strongly	Familiar With Association of American Feed Control Officials Publications		Familiar With National Research Council: Nutrient Requirements for Dogs and Cats	Consulted National Research Council: Nutrient Requirements for Dogs and Cats	Familiar With Small Animal Clinical Nutrition, or similar texts for professionals	Consulted Small Animal Clinical Nutrition, or similar texts for professionals	Familiar With Professional websites	Consulted Professional websites	Yes (Please specify)	FEDIAF guidelines	1-2 hours per day	Female	41-50
1			Selected		2	Yes	Breeder instructions or advice	Internet					My veterinarian			Consult with a nutritionist or veterinarian							Very much	Very much	Beneficial	Harmful	Harmful	Beneficial	Agree Somewhat	Disagree Somewhat	Agree Somewhat	Disagree Somewhat	Don't Know	Don't Know	Agree Strongly	Agree Somewhat									Yes (Please specify)	Cachorro Verde	More than 2 hours per day	Female	31-40
1		Selected		1		Yes		Internet	Friend/family member														Very much	Somewhat	Beneficial	Beneficial	Beneficial	Unnecessary	Disagree Somewhat	Agree Somewhat	Agree Somewhat	Agree Somewhat	Disagree Strongly	Don't Know	Agree Strongly	Agree Strongly	Familiar With Association of American Feed Control Officials Publications		Familiar With National Research Council: Nutrient Requirements for Dogs and Cats		Familiar With Small Animal Clinical Nutrition, or similar texts for professionals		Familiar With Professional websites		No		More than 2 hours per day	Female	18-30
1		Selected	Selected	1	3	Yes			Friend/family member				My veterinarian										Very much	Very much	Beneficial	Beneficial	Beneficial	Beneficial	Disagree Strongly	Agree Somewhat	Agree Somewhat	Disagree Somewhat	Disagree Strongly	Disagree Strongly	Agree Somewhat	Agree Strongly					Familiar With Small Animal Clinical Nutrition, or similar texts for professionals						More than 2 hours per day	Female	18-30
1		Selected		2		Yes	Breeder instructions or advice	Internet							Book, magazine or other printed source written by a veterinarian other than your own								Somewhat	Somewhat	Unnecessary	Unnecessary	Beneficial	Beneficial	Agree Strongly	Agree Strongly	Agree Strongly	Agree Strongly	Agree Strongly	Agree Strongly	Agree Strongly	Agree Strongly	Familiar With Association of American Feed Control Officials Publications		Familiar With National Research Council: Nutrient Requirements for Dogs and Cats		Familiar With Small Animal Clinical Nutrition, or similar texts for professionals		Familiar With Professional websites		Yes (Please specify)	truth about pet food website Susan Thixton	1-2 hours per day	Female	51-60
1		Selected	Selected	1	1	Yes		Internet								Consult with a nutritionist or veterinarian	Used a published reference source	Used information from an online resource		Breeder			Somewhat	Not very much	Unnecessary	Harmful	Harmful	Beneficial	Agree Strongly	Agree Somewhat	Agree Strongly	Agree Strongly	Agree Somewhat	Don't Know	Don't Know	Don't Know									No		More than 2 hours per day	Female	18-30
1			Selected		4	Yes	Breeder instructions or advice		Friend/family member								Used a published reference source	Used information from an online resource	Friend/family member	Breeder			A little	Not very much	Harmful	Harmful	Harmful	Unnecessary	Agree Somewhat	Agree Somewhat	Agree Strongly	Agree Somewhat	Agree Strongly	Agree Strongly	Agree Strongly	Agree Strongly	Familiar With Association of American Feed Control Officials Publications		Familiar With National Research Council: Nutrient Requirements for Dogs and Cats		Familiar With Small Animal Clinical Nutrition, or similar texts for professionals		Familiar With Professional websites				1-2 hours per day	Female	18-30
1		Selected		5		Yes								Email group				Used information from an online resource					Somewhat	A little	Beneficial	Beneficial	Beneficial	Beneficial	Agree Somewhat	Disagree Somewhat	Agree Somewhat	Agree Somewhat	Agree Somewhat	Agree Strongly	Agree Strongly	Agree Strongly			Familiar With National Research Council: Nutrient Requirements for Dogs and Cats				Familiar With Professional websites	Consulted Professional websites			1-2 hours per day	Female	51-60
1		Selected		1		Yes		Internet	Friend/family member									Used information from an online resource	Friend/family member				Somewhat	Not very much	Unnecessary	Beneficial	Beneficial	Unnecessary	Agree Strongly	Agree Somewhat	Agree Strongly	Agree Somewhat	Disagree Somewhat	Agree Strongly	Agree Strongly	Agree Somewhat							Familiar With Professional websites		Yes (Please specify)	Facebook group Raw Feeding For IBD Kitties, Facebook group IBDKitties	More than 2 hours per day	Female	61 or older
1		Selected		3		Yes		Internet							Book, magazine or other printed source written by a veterinarian other than your own			Used information from an online resource					Somewhat	Not very much	Unnecessary	Beneficial	Beneficial	Beneficial	Disagree Somewhat	Don't Know	Agree Strongly	Agree Somewhat	Agree Somewhat	Disagree Strongly	Agree Strongly	Agree Strongly	Familiar With Association of American Feed Control Officials Publications		Familiar With National Research Council: Nutrient Requirements for Dogs and Cats		Familiar With Small Animal Clinical Nutrition, or similar texts for professionals						More than 2 hours per day	Male	18-30
1		Selected	Selected	2	2	Yes		Internet				Pet store employee	My veterinarian	Email group				Used information from an online resource					Very much	Somewhat	Beneficial	Beneficial	Beneficial	Unnecessary	Agree Somewhat	Disagree Somewhat	Agree Strongly	Agree Strongly	Agree Somewhat	Agree Somewhat	Agree Strongly	Agree Strongly	Familiar With Association of American Feed Control Officials Publications		Familiar With National Research Council: Nutrient Requirements for Dogs and Cats		Familiar With Small Animal Clinical Nutrition, or similar texts for professionals		Familiar With Professional websites		No		More than 2 hours per day	Female	18-30
1		Selected	Selected	1	2	Yes							My veterinarian										Very much	Very much	Beneficial	Beneficial	Beneficial	Beneficial	Disagree Somewhat	Agree Somewhat	Agree Somewhat	Agree Somewhat	Agree Somewhat	Disagree Somewhat	Agree Somewhat	Agree Somewhat									No		1-2 hours per day	Female	18-30
1		Selected	Selected	1	1	Yes	Breeder instructions or advice	Internet	Friend/family member						Book, magazine or other printed source written by a veterinarian other than your own			Used information from an online resource		Breeder			Somewhat	Not very much	Beneficial	Beneficial	Beneficial	Beneficial	Agree Somewhat	Agree Somewhat	Agree Strongly	Agree Strongly	Disagree Strongly	Agree Somewhat	Agree Strongly	Agree Strongly							Familiar With Professional websites	Consulted Professional websites	No		More than 2 hours per day	Female	18-30
1			Selected		2	Yes			Friend/family member						Book, magazine or other printed source written by a veterinarian other than your own		Used a published reference source						Somewhat	Not very much	Beneficial	Beneficial	Harmful	Beneficial	Agree Strongly	Agree Strongly	Agree Strongly	Agree Strongly	Disagree Somewhat	Agree Strongly	Agree Strongly	Agree Strongly	Familiar With Association of American Feed Control Officials Publications		Familiar With National Research Council: Nutrient Requirements for Dogs and Cats		Familiar With Small Animal Clinical Nutrition, or similar texts for professionals		Familiar With Professional websites		No		1-2 hours per day	Female	18-30
1			Selected		3	Yes							My veterinarian			Consult with a nutritionist or veterinarian	Used a published reference source	Used information from an online resource					Somewhat	A little	Harmful	Harmful	Harmful	Beneficial	Agree Strongly	Agree Strongly	Agree Strongly	Agree Strongly	Agree Strongly	Agree Strongly	Agree Strongly	Agree Strongly									Yes (Please specify)	Unlocking the Canine Ancestral Diet by Steve Brown, Give Your Dog a Bone by Ian Billinghurst, Grow Your Pups with Bones by Ian Billinghurst, Natural Nutrition for Dogs and Cats by Kymythy Schultze, Real Food for Healthy Dogs and Cats by Karen Becker, vari	1-2 hours per day	Female	41-50
1		Selected	Selected	3	1	Yes		Internet										Used information from an online resource					Somewhat	Not very much	Beneficial	Beneficial	Beneficial	Unnecessary	Agree Strongly	Agree Strongly	Agree Strongly	Agree Strongly	Agree Strongly	Agree Strongly	Agree Strongly	Agree Strongly									Yes (Please specify)	Holistic vet websites; Raw feeding Yahoo group	1-2 hours per day	Female	41-50
1		Selected	Selected	4	4	Yes				Magazine													Somewhat	Not very much	Unnecessary	Beneficial	Beneficial	Beneficial	Agree Strongly	Agree Strongly	Agree Somewhat	Agree Strongly	Agree Somewhat	Agree Somewhat	Agree Strongly	Agree Strongly	Familiar With Association of American Feed Control Officials Publications			Consulted National Research Council: Nutrient Requirements for Dogs and Cats		Consulted Small Animal Clinical Nutrition, or similar texts for professionals	Familiar With Professional websites		Yes (Please specify)	www.dogfoodadvisor.com	1-2 hours per day	Female	41-50
1			Selected		2	Yes	Breeder instructions or advice	Internet							Book, magazine or other printed source written by a veterinarian other than your own		Used a published reference source	Used information from an online resource		Breeder			Somewhat	Not very much	Harmful	Harmful	Harmful	Beneficial	Disagree Somewhat	Disagree Somewhat	Agree Strongly	Agree Strongly	Disagree Somewhat	Agree Strongly	Agree Strongly	Agree Strongly	Familiar With Association of American Feed Control Officials Publications						Familiar With Professional websites				More than 2 hours per day	Female	31-40
1			Selected		3	Yes	Breeder instructions or advice	Internet					My veterinarian			Consult with a nutritionist or veterinarian		Used information from an online resource		Breeder			Very much	Somewhat	Beneficial	Unnecessary	Beneficial	Beneficial	Agree Strongly	Agree Strongly	Agree Strongly	Agree Strongly	Disagree Somewhat	Agree Somewhat	Agree Strongly	Agree Strongly	Familiar With Association of American Feed Control Officials Publications		Familiar With National Research Council: Nutrient Requirements for Dogs and Cats		Familiar With Small Animal Clinical Nutrition, or similar texts for professionals		Familiar With Professional websites		Yes (Please specify)	http://www.whole-dog-journal.com/topics/dog_food.html, http://www.dogfoodadvisor.com/best-dog-foods/raw-dog-food/, http://healthypets.mercola.com/sites/healthypets/dr-karen-becker.aspx	Less than one hour per day	Female	31-40
1		Selected		5		Yes		Internet	Friend/family member														Very much	Very much	Beneficial	Beneficial	Beneficial	Beneficial	Agree Somewhat	Agree Somewhat	Agree Somewhat	Agree Somewhat	Disagree Strongly	Disagree Somewhat	Don't Know	Don't Know							Familiar With Professional websites		No		More than 2 hours per day	Female	41-50
1		Selected		2		Yes			Friend/family member									Used information from an online resource					Very much	Somewhat	Beneficial	Unnecessary	Beneficial	Beneficial	Disagree Somewhat	Agree Somewhat	Agree Strongly	Agree Somewhat	Disagree Strongly	Don't Know	Agree Somewhat	Agree Strongly		Consulted Association of American Feed Control Officials Publications		Consulted National Research Council: Nutrient Requirements for Dogs and Cats		Consulted Small Animal Clinical Nutrition, or similar texts for professionals	Familiar With Professional websites		Yes (Please specify)	"Taurine concentrations in Animal Feed ingredients", "Nutrient Composition of Whole Vertebrate Prey (excluding Fish) fed in Zoos", "The Carnivore Connection to Nutrition in Cats", "Raw Meaty Bones" (Lonsdale)	More than 2 hours per day	Female	41-50
1			Selected		1	Yes							My veterinarian										Very much	Very much	Harmful	Beneficial	Beneficial	Beneficial	Agree Strongly	Agree Strongly	Agree Strongly	Agree Strongly	Agree Strongly	Agree Strongly	Agree Strongly	Agree Strongly			Familiar With National Research Council: Nutrient Requirements for Dogs and Cats		Familiar With Small Animal Clinical Nutrition, or similar texts for professionals	Consulted Small Animal Clinical Nutrition, or similar texts for professionals	Familiar With Professional websites		Yes (Please specify)	lectures at veterinary conferences	More than 2 hours per day	Male	51-60
1			Selected		2	Yes			Friend/family member		Book					Consult with a nutritionist or veterinarian	Used a published reference source						Somewhat	Somewhat	Unnecessary	Unnecessary	Unnecessary	Unnecessary	Agree Somewhat	Agree Somewhat	Agree Strongly	Agree Somewhat	Disagree Somewhat	Agree Strongly	Agree Strongly	Agree Strongly							Familiar With Professional websites		Yes (Please specify)	Dr Beckers books	1-2 hours per day	Female	31-40
1			Selected		1	No																	Very much	Very much	Beneficial	Beneficial	Beneficial	Beneficial	Agree Somewhat	Agree Somewhat	Agree Somewhat	Agree Somewhat	Disagree Somewhat	Disagree Somewhat	Don't Know	Agree Strongly	Familiar With Association of American Feed Control Officials Publications		Familiar With National Research Council: Nutrient Requirements for Dogs and Cats		Familiar With Small Animal Clinical Nutrition, or similar texts for professionals		Familiar With Professional websites		No		1-2 hours per day	Female	41-50
1			Selected		3	Yes		Internet		Magazine	Book				Book, magazine or other printed source written by a veterinarian other than your own		Used a published reference source	Used information from an online resource					A little	Not very much	Harmful	Harmful	Unnecessary	Beneficial	Agree Somewhat	Agree Strongly	Agree Strongly	Agree Strongly	Agree Strongly	Agree Strongly	Agree Strongly	Agree Somewhat			Familiar With National Research Council: Nutrient Requirements for Dogs and Cats		Familiar With Small Animal Clinical Nutrition, or similar texts for professionals						1-2 hours per day	Female	41-50
1		Selected	Selected	1	1	Yes					Book		My veterinarian		Book, magazine or other printed source written by a veterinarian other than your own	Consult with a nutritionist or veterinarian	Used a published reference source						Somewhat	A little	Beneficial	Unnecessary	Beneficial	Unnecessary	Agree Strongly	Agree Strongly	Agree Strongly	Agree Strongly	Agree Somewhat	Agree Somewhat	Agree Strongly	Agree Strongly			Familiar With National Research Council: Nutrient Requirements for Dogs and Cats		Familiar With Small Animal Clinical Nutrition, or similar texts for professionals		Familiar With Professional websites				Less than one hour per day	Female	61 or older
1		Selected	Selected	2	5	Yes		Internet								Consult with a nutritionist or veterinarian	Used a published reference source	Used information from an online resource					Very much	Not very much	Beneficial	Beneficial	Beneficial	Beneficial	Disagree Strongly	Disagree Strongly	Disagree Strongly	Disagree Strongly	Agree Somewhat	Agree Somewhat	Disagree Strongly	Disagree Strongly	Familiar With Association of American Feed Control Officials Publications	Consulted Association of American Feed Control Officials Publications	Familiar With National Research Council: Nutrient Requirements for Dogs and Cats	Consulted National Research Council: Nutrient Requirements for Dogs and Cats	Familiar With Small Animal Clinical Nutrition, or similar texts for professionals	Consulted Small Animal Clinical Nutrition, or similar texts for professionals	Familiar With Professional websites	Consulted Professional websites			More than 2 hours per day	Female	31-40
1			Selected		4	Yes	Breeder instructions or advice	Internet				Pet store employee		Email group			Used a published reference source	Used information from an online resource					Somewhat	Somewhat	Beneficial	Beneficial	Beneficial	Beneficial	Agree Strongly	Agree Strongly	Agree Strongly	Agree Strongly	Agree Strongly	Agree Strongly	Agree Strongly	Agree Strongly											More than 2 hours per day	Female	51-60
1		Selected		3		Yes						Pet store employee											Very much	Very much	Beneficial	Beneficial	Beneficial	Beneficial	Disagree Strongly	Disagree Somewhat	Agree Strongly	Agree Somewhat	Disagree Strongly	Disagree Strongly	Agree Strongly	Disagree Somewhat	Familiar With Association of American Feed Control Officials Publications			Consulted National Research Council: Nutrient Requirements for Dogs and Cats		Consulted Small Animal Clinical Nutrition, or similar texts for professionals	Familiar With Professional websites		Yes (Please specify)	Hills & purina product guide	1-2 hours per day	Female	18-30
1		Selected	Selected	1	3	Yes	Breeder instructions or advice	Internet					My veterinarian	Email group									Very much	Very much	Beneficial	Beneficial	Beneficial	Beneficial	Disagree Somewhat	Agree Strongly	Agree Strongly	Agree Strongly	Disagree Somewhat	Disagree Somewhat	Agree Strongly	Agree Strongly	Familiar With Association of American Feed Control Officials Publications	Consulted Association of American Feed Control Officials Publications	Familiar With National Research Council: Nutrient Requirements for Dogs and Cats	Consulted National Research Council: Nutrient Requirements for Dogs and Cats		Consulted Small Animal Clinical Nutrition, or similar texts for professionals		Consulted Professional websites			More than 2 hours per day	Female	41-50
1		Selected	Selected	2	3	Yes									Book, magazine or other printed source written by a veterinarian other than your own		Used a published reference source						Somewhat	Somewhat	Beneficial	Beneficial	Beneficial	Beneficial	Agree Somewhat	Agree Somewhat	Agree Somewhat	Agree Somewhat	Don't Know	Agree Somewhat	Agree Strongly	Agree Somewhat	Familiar With Association of American Feed Control Officials Publications								Yes (Please specify)	Whole dog journal	More than 2 hours per day	Female	51-60
1		Selected	Selected	1	2	Yes		Internet															Very much	Not very much	Beneficial	Beneficial	Beneficial	Beneficial	Disagree Strongly	Disagree Somewhat	Agree Strongly	Agree Strongly	Disagree Strongly	Disagree Strongly	Agree Strongly	Agree Somewhat	Familiar With Association of American Feed Control Officials Publications	Consulted Association of American Feed Control Officials Publications	Familiar With National Research Council: Nutrient Requirements for Dogs and Cats	Consulted National Research Council: Nutrient Requirements for Dogs and Cats	Familiar With Small Animal Clinical Nutrition, or similar texts for professionals		Familiar With Professional websites	Consulted Professional websites			More than 2 hours per day	Female	18-30
1		Selected		1		Yes		Internet								Consult with a nutritionist or veterinarian	Used a published reference source	Used information from an online resource				Decided proportions and composition based on availability	Somewhat	Not very much	Beneficial	Unnecessary	Beneficial	Beneficial	Agree Somewhat	Agree Strongly	Agree Strongly	Agree Strongly	Don't Know	Agree Strongly	Agree Strongly	Agree Strongly							Familiar With Professional websites	Consulted Professional websites	No		1-2 hours per day	Female	18-30
1			Selected		1	Yes			Friend/family member						Book, magazine or other printed source written by a veterinarian other than your own								Very much	Very much	Beneficial	Beneficial	Beneficial	Beneficial	Agree Somewhat	Agree Strongly	Agree Strongly	Agree Strongly	Disagree Strongly	Disagree Somewhat	Agree Strongly	Agree Strongly	Familiar With Association of American Feed Control Officials Publications		Familiar With National Research Council: Nutrient Requirements for Dogs and Cats		Familiar With Small Animal Clinical Nutrition, or similar texts for professionals		Familiar With Professional websites		No		1-2 hours per day	Female	31-40
1		Selected	Selected	1	1	Yes		Internet			Book			Email group	Book, magazine or other printed source written by a veterinarian other than your own		Used a published reference source	Used information from an online resource					Very much	A little	Beneficial	Beneficial	Beneficial	Beneficial	Agree Somewhat	Agree Strongly	Agree Strongly	Agree Strongly	Disagree Strongly	Disagree Strongly	Agree Strongly	Agree Strongly			Familiar With National Research Council: Nutrient Requirements for Dogs and Cats			Consulted Small Animal Clinical Nutrition, or similar texts for professionals	Familiar With Professional websites		No		1-2 hours per day	Female	51-60
1		Selected		5		Yes	Breeder instructions or advice	Internet		Magazine	Book	Pet store employee	My veterinarian		Book, magazine or other printed source written by a veterinarian other than your own			Used information from an online resource			Pet store personnel	Decided proportions and composition based on availability	Somewhat	A little	Beneficial	Unnecessary	Beneficial	Beneficial	Agree Somewhat	Disagree Strongly	Agree Somewhat	Disagree Somewhat	Disagree Somewhat	Agree Somewhat	Agree Strongly	Agree Strongly	Familiar With Association of American Feed Control Officials Publications								Yes (Please specify)	Petmd	More than 2 hours per day	Female	31-40
1		Selected	Selected	1	1	Yes							My veterinarian			Consult with a nutritionist or veterinarian							A little	Not very much	Harmful	Harmful	Harmful	Beneficial	Agree Strongly	Agree Strongly	Agree Strongly	Agree Strongly	Agree Somewhat	Agree Somewhat	Agree Strongly	Agree Strongly	Familiar With Association of American Feed Control Officials Publications	Consulted Association of American Feed Control Officials Publications	Familiar With National Research Council: Nutrient Requirements for Dogs and Cats	Consulted National Research Council: Nutrient Requirements for Dogs and Cats	Familiar With Small Animal Clinical Nutrition, or similar texts for professionals	Consulted Small Animal Clinical Nutrition, or similar texts for professionals	Familiar With Professional websites	Consulted Professional websites	Yes (Please specify)	As a veterinarian I read anything I can get my hands on.	More than 2 hours per day	Female	61 or older
1			Selected		3	Yes									Book, magazine or other printed source written by a veterinarian other than your own	Consult with a nutritionist or veterinarian		Used information from an online resource					Somewhat	A little		Unnecessary	Beneficial	Beneficial	Agree Strongly	Agree Strongly	Agree Strongly	Agree Strongly	Agree Strongly	Agree Strongly	Agree Strongly	Agree Somewhat											More than 2 hours per day	Female	31-40
1			Selected		1	Yes	Breeder instructions or advice	Internet	Friend/family member									Used information from an online resource	Friend/family member	Breeder			A little	Not very much	Unnecessary	Unnecessary	Unnecessary	Unnecessary	Disagree Somewhat	Agree Somewhat	Agree Strongly	Agree Somewhat	Agree Somewhat	Agree Strongly	Agree Strongly	Agree Strongly									No		More than 2 hours per day	Female	51-60
1		Selected		3		Yes		Internet			Book											Decided proportions and composition based on availability	Somewhat	Not very much	Beneficial	Beneficial	Beneficial	Beneficial	Agree Strongly	Agree Somewhat	Agree Strongly	Agree Somewhat	Agree Strongly	Agree Strongly	Agree Strongly	Disagree Somewhat	Familiar With Association of American Feed Control Officials Publications		Familiar With National Research Council: Nutrient Requirements for Dogs and Cats			Consulted Small Animal Clinical Nutrition, or similar texts for professionals	Familiar With Professional websites		Yes (Please specify)	Myself as a Certified Veterinary Technician	More than 2 hours per day	Female	31-40
1			Selected		2	Yes		Internet	Friend/family member														Very much	Very much	Beneficial	Beneficial	Beneficial	Beneficial	Agree Strongly	Agree Strongly	Agree Somewhat	Agree Somewhat	Agree Somewhat	Agree Somewhat	Agree Strongly	Agree Strongly									No		More than 2 hours per day	Male	31-40
1			Selected		2	No																	Very much	Very much	Beneficial	Beneficial	Beneficial	Beneficial	Disagree Somewhat	Disagree Somewhat	Disagree Somewhat	Disagree Somewhat	Disagree Somewhat	Disagree Somewhat	Disagree Somewhat	Disagree Somewhat	Familiar With Association of American Feed Control Officials Publications		Familiar With National Research Council: Nutrient Requirements for Dogs and Cats		Familiar With Small Animal Clinical Nutrition, or similar texts for professionals		Familiar With Professional websites		No		More than 2 hours per day	Male	41-50
1		Selected		1		Yes		Internet	Friend/family member						Book, magazine or other printed source written by a veterinarian other than your own		Used a published reference source	Used information from an online resource	Friend/family member				Very much	A little	Beneficial	Beneficial	Beneficial	Beneficial	Agree Somewhat	Agree Somewhat	Agree Strongly	Agree Strongly	Disagree Somewhat	Agree Strongly	Agree Strongly	Agree Strongly	Familiar With Association of American Feed Control Officials Publications		Familiar With National Research Council: Nutrient Requirements for Dogs and Cats			Consulted Small Animal Clinical Nutrition, or similar texts for professionals		Consulted Professional websites	Yes (Please specify)	Online studies, others that feed the same food and why. Raw feeding forums and forums on cat biology	1-2 hours per day	Female	18-30
1			Selected		5	Yes		Internet									Used a published reference source						Somewhat	Not very much	Unnecessary	Beneficial	Beneficial	Beneficial	Agree Strongly	Agree Somewhat	Agree Strongly	Agree Strongly	Agree Somewhat	Agree Strongly	Agree Strongly	Agree Strongly	Familiar With Association of American Feed Control Officials Publications		Familiar With National Research Council: Nutrient Requirements for Dogs and Cats		Familiar With Small Animal Clinical Nutrition, or similar texts for professionals		Familiar With Professional websites		No		More than 2 hours per day	Female	18-30
1		Selected		1		Yes		Internet															Very much	Somewhat	Beneficial	Beneficial	Beneficial	Beneficial	Disagree Somewhat	Agree Strongly	Agree Strongly	Agree Strongly	Disagree Strongly	Disagree Strongly	Don't Know	Don't Know		Consulted Association of American Feed Control Officials Publications		Consulted National Research Council: Nutrient Requirements for Dogs and Cats		Consulted Small Animal Clinical Nutrition, or similar texts for professionals	Familiar With Professional websites		No		More than 2 hours per day	Male	18-30
1		Selected	Selected	6	2	Yes		Internet			Book				Book, magazine or other printed source written by a veterinarian other than your own		Used a published reference source	Used information from an online resource					Very much	Somewhat	Beneficial	Beneficial	Beneficial	Beneficial	Agree Somewhat	Agree Somewhat	Agree Strongly	Agree Strongly	Disagree Somewhat	Agree Somewhat	Agree Strongly	Agree Strongly	Familiar With Association of American Feed Control Officials Publications		Familiar With National Research Council: Nutrient Requirements for Dogs and Cats		Familiar With Small Animal Clinical Nutrition, or similar texts for professionals		Familiar With Professional websites		No		1-2 hours per day	Female	18-30
1		Selected		2		Yes			Friend/family member		Book												Not very much	Not very much	Unnecessary	Beneficial	Beneficial	Beneficial	Agree Somewhat	Agree Somewhat	Agree Strongly	Agree Somewhat	Agree Strongly	Agree Strongly	Agree Strongly	Agree Strongly									No		More than 2 hours per day	Female	18-30
1		Selected	Selected	2	3	Yes			Friend/family member														Very much	A little	Beneficial	Beneficial	Beneficial	Beneficial	Agree Strongly	Agree Strongly	Agree Strongly	Agree Strongly	Agree Somewhat	Agree Somewhat	Agree Strongly	Agree Strongly							Familiar With Professional websites		No		Less than one hour per day	Female	41-50
[truncated: 1,650 more rows]
[truncated: 3 more columns]

## Sheet: Cats
Pet	Q2.13_1	Q2.14_1	Q2.21_1	Q2.22_1	Q2.25d1_4	Q2.25d1_5	Q2.25d1_6	Q2.25d1_7	Q2.25d1_8	Q2.25d1_9	Q2.25d1_10	Q2.25d1_11	Q2.25d1_12	Q2.25d1_13	Q2.25d1_14	Q2.25d1_15	Q2.25d1_16	Q2.25d1_17	Q2.26_1
[truncated: 2,732 more rows]

[truncated: 2 more sheets: Dogs, Combined Frequencies]
